# Supplementary material for: Indium(i)-catalyzed alkyl–allyl coupling between ethers and an allylborane
Source: Royal Society of Chemistry journal article supplement (doi:10.1039/c0cc03673k), 2010-11-22

# Indium(I)-catalyzed alkyl–allyl coupling between ethers and an allylborane

Hai Thanh Dao, Uwe Schneider and Shū Kobayashi\*

*Department of Chemistry, School of Science and Graduate School of  
Pharmaceutical Sciences, The University of Tokyo, Hongo, Bunkyo-ku, Tokyo 113-0033, Japan*

## Electronic Supplementary Information (ESI)

### Table of Contents

| <i>Experimental</i>                                  | Page |
|------------------------------------------------------|------|
| 1 General                                            | S–2  |
| 2 Starting materials                                 | S–2  |
| 2.1 Procedure for synthesis of starting materials    | S–2  |
| 2.2 Analytical data for unknown ethers               | S–2  |
| 3 In(I)-catalyzed coupling reactions                 | S–3  |
| 3.1 Procedure for In(I)-catalyzed C–C bond formation | S–3  |
| 3.2 Analytical data for products                     | S–3  |
| 4 References                                         | S–7  |
| 5 Spectra                                            | S–9  |

## 1 General

Nuclear Magnetic Resonance (NMR) spectra were recorded on a JEOL ECX-400, a JEOL ECA-500, or a JEOL ECX-600 spectrometer, operating at 400 MHz, 500 MHz, or 600 MHz for  $^1\text{H}$  NMR, and 100 MHz, 125 MHz, or 150 MHz for  $^{13}\text{C}$  NMR (128 MHz for  $^{11}\text{B}$  NMR). Chemical shifts were reported downfield from tetramethylsilane (TMS). Infra Red (IR) spectra were measured using a JASSO FT/IR-610 spectrometer. High Resolution Mass Spectra (HRMS) were recorded using a JEOL JMS T100TD (DART) spectrometer. Preparative thin-layer chromatography (PTLC) was carried out using Wakogel B-5F from WAKO. All solvents used were commercially available dry solvents that were further dried and degassed appropriately under an argon atmosphere, and stored over activated molecular sieves in an argon box prior to use.

InOTf was prepared according to a reported procedure, and stored in an argon box at  $-30\text{ }^\circ\text{C}$ .<sup>1</sup> All other metal salts were purchased from ALDRICH, and stored in an argon box at room temperature. All reactions were carried out under an argon atmosphere in flame-dried glassware. 9-BBN-derived allylborane **2b** was synthesized according to a reported method.<sup>2</sup>

## 2 Starting materials

### 2.1 Procedure for synthesis of starting materials

To a stirred solution of an alcohol (20 mmol) in dry THF (20 mL) at  $0\text{ }^\circ\text{C}$  was slowly added NaH (2 equiv). The reaction mixture was further stirred at  $0\text{ }^\circ\text{C}$  for 1 h before slow addition of MeI (1.5 equiv). The mixture was then allowed to reach to room temperature overnight. Quenching with water followed by extraction ( $\text{Et}_2\text{O}$ ,  $3 \times 10\text{ mL}$ ) and evaporation afforded the corresponding crude ether product, which was then purified by column chromatography to provide substrates **1a–u**.

### 2.2 Analytical data for unknown ethers

#### 1-Bromo-3-(1-methoxyethyl)-benzene (**1f**):

$^1\text{H}$  NMR ( $\text{CDCl}_3$ , 600 Hz):  $\delta$  = 1.42 (s, 3H), 3.23 (s, 3H), 4.23–4.27 (q,  $J$  = 7.2, 1H), 7.20–7.26 (m, 2H), 7.40–7.46 (m, 2H) ppm.

$^{13}\text{C}$  NMR ( $\text{CDCl}_3$ , 150 Hz):  $\delta$  = 23.8, 56.6, 79.0, 122.6, 124.8, 129.2, 130.1, 130.5, 146.0 ppm.

IR (neat):  $\nu$  = 2977, 2930, 2320, 1117, 1068, 998, 871, 668  $\text{cm}^{-1}$ .

HRMS (DART): calculated for  $\text{C}_8\text{H}_8^{79}\text{Br}^+ = [\text{M}-\text{OMe}]^+$ :  $m/z$  = 182.98094, found:  $m/z$  = 182.98041.

#### 1-Methoxy-1-(2-thienyl)-ethane (**1k**):

$^1\text{H}$  NMR ( $\text{CDCl}_3$ , 600 Hz):  $\delta$  = 1.56 (s, 3H), 3.27 (s, 3H), 4.56–4.58 (q,  $J$  = 6.9, 1H), 6.95–6.97 (m, 2H), 7.25–7.26 (m, 1H), ppm.

$^{13}\text{C}$  NMR ( $\text{CDCl}_3$ , 150 Hz):  $\delta$  = 23.8, 56.2, 74.9, 124.5, 124.7, 126.3, 147.2 ppm.

IR (neat):  $\nu$  = 2978, 2930, 2820, 1113, 1086, 996, 858, 830, 701  $\text{cm}^{-1}$ .

HRMS (DART): calculated for  $\text{C}_6\text{H}_7^{32}\text{S}^+ = [\text{M}-\text{OMe}]^+$ :  $m/z$  = 111.02685, found:  $m/z$  = 182.02728.

### 3 In(I)-catalyzed coupling reactions

#### 3.1 Procedure for In(I)-catalyzed C–C bond formation

To a flame-dried 5 ml-screw-vial with magnetic stirring bar in an argon box were added successively InOTf (1–5 mol%), dry toluene or DCM (0.5 M), the corresponding ether **1a–u** (0.4 mmol), and allylborane **2b** (1.2–2.0 equiv). The reaction mixture was stirred at the indicated temperature for the indicated time until complete consumption of the corresponding electrophile **1** (detected by TLC or  $^1\text{H}$  NMR analyses of an aliquot of the reaction mixture). The crude reaction mixtures were purified -without further treatment- by preparative thin layer chromatography (PTLC; eluant: hexane  $\rightarrow$  hexane/ $\text{Et}_2\text{O}$  = 95:5) or column chromatography (eluant: hexane) to afford the corresponding products **3a–u**.

#### 3.2 Analytical data for products

##### 2-(1-Methyl-3-buten-1-yl)-naphthalene (**3a**):

Prepared from ether **1a** and allylborane **2b** (1.2 equiv) according to the general procedure with InOTf (1 mol%) in DCM (0.5 M) at 25 °C for 90 min. *The obtained analytical data of 3a fit accurately with the reported data.*<sup>3</sup>

Colorless liquid.

Yield: 86%.

##### 4-Benzyl-1-butene (**3b**):

Prepared from ether **1b** and allylborane **2b** (1.5 equiv) according to the general procedure with InOTf (5 mol%) in DCM (0.5 M) at 25 °C for 14 h. *The obtained analytical data of 3b fit accurately with the reported data.*<sup>4</sup>

Colorless liquid.

Yield 25%.

##### 4-(4-Methoxyphenyl)-1-butene (**3c**):

Prepared from ether **1c** and allylborane **2b** (1.2 equiv) according to the general procedure with InOTf (2 mol%) in toluene (0.5 M) at a temperature range from –20 °C to room temperature for 14 h. *The obtained analytical data of 3c fit accurately with the reported data.*<sup>5</sup>

Colorless liquid.

Yield: 80%.

##### 2-(3-Buten-1-yl)-naphthalene (**3d**):

Prepared from ether **1d** and allylborane **2b** (1.5 equiv) according to the general procedure with InOTf (5

mol%) in DCM (0.5 M) at 25 °C for 14 h. *The obtained analytical data of 3d fit accurately with the reported data.*<sup>5</sup>

Colorless liquid.

Yield 25%.

**(1-Methyl-3-buten-1-yl)-benzene (3e):**

Prepared from ether **1e** and allylborane **2b** (1.2 equiv) according to the general procedure with InOTf (2 mol%) in DCM (0.5 M) at 25 °C for 30 min. *The obtained analytical data of 3e fit accurately with the reported data.*<sup>4</sup>

Colorless liquid.

Yield: 73%.

**1-Bromo-3-(1-methyl-3-buten-1-yl)-benzene (3f):**

Prepared from ether **1f** and allylborane **2b** (1.2 equiv) according to the general procedure with InOTf (2 mol%) in DCM (0.5 M) at 25 °C for 5 h.

Colorless liquid.

Yield 55%.

<sup>1</sup>H NMR (CDCl<sub>3</sub>, 600 Hz): δ = 1.22–1.24 (d, *J* = 6.9, 3H), 2.24–2.29 (m, 1H), 2.33–2.37 (m, 1H), 2.74–2.77 (m, 1H), 4.96–5.00 (m, 2H), 5.64–5.71 (m, 1H), 7.11–7.17 (m, 2H), 7.31–7.34 (m, 2H) ppm.

<sup>13</sup>C NMR (CDCl<sub>3</sub>, 150 Hz): δ = 21.3, 39.6, 42.4, 116.3, 122.4, 125.7, 129.0, 129.9, 130.1, 136.5, 149.4 ppm

IR (neat): ν = 2961, 1558, 1540, 1260, 1072, 668 cm<sup>-1</sup>.

HRMS (DART): calculated for C<sub>11</sub>H<sub>14</sub><sup>81</sup>Br<sup>+</sup> = [M+H]<sup>+</sup>: *m/z* = 227.02584, found: *m/z* = 227.02524.

**(1-(2-Chloroethyl)-3-buten-1-yl)-benzene (3g):**

Prepared from ether **1g** and allylborane **2b** (1.2 equiv) according to the general procedure with InOTf (5 mol%) in DCM (0.5 M) at 25 °C for 30 min. *The obtained analytical data of 3g fit accurately with the reported data.*<sup>6</sup>

Colorless liquid.

Yield: 62%.

**1-Allyl-1,2,3,4-tetrahydronaphthalene (3h):**

Prepared from ether **1h** and allylborane **2b** (1.2 equiv) according to the general procedure with InOTf (2 mol%) in DCM (0.5 M) at 25 °C for 30 min. *The obtained analytical data of 3h fit accurately with the reported data.*<sup>7</sup>

Colorless liquid.

Yield: 83%.

**4,4-Diphenyl-1-butene (3i):**

Prepared from ether **1i** and allylborane **2b** (1.2 equiv) according to the general procedure with InOTf (2

mol%) in DCM (0.5 M) at 25 °C for 30 min. *The obtained analytical data of 3i fit accurately with the reported data.*<sup>7</sup>

Colorless liquid.

Yield: 98%.

#### **4-(*p*-Methoxyphenyl)-4-phenyl-1-butene (3j):**

Prepared from ether **1j** and allylborane **2b** (1.2 equiv) according to the general procedure with InOTf (2 mol%) in DCM (0.5 M) at 25 °C for 30 min. *The obtained analytical data of 3j fit accurately with the reported data.*<sup>6</sup>

Colorless liquid.

Yield: 94%.

#### **4-(2-Thienyl)-1-pentene (3k):**

Prepared from ether **1k** and allylborane **2b** (1.2 equiv) according to the general procedure with InOTf (5 mol%) in DCM (0.5 M) at 25 °C for 30 min.

Colorless liquid.

Yield 45%.

**<sup>1</sup>H NMR** (CDCl<sub>3</sub>, 600 Hz):  $\delta$  = 1.32–1.33 (d,  $J$  = 7.6, 3H), 2.30–2.35 (m, 1H), 2.43–2.47 (m, 1H), 3.10–3.13 (m, 1H), 5.00–5.06 (m, 2H), 5.73–5.79 (m, 1H), 6.80–6.81 (d,  $J$  = 3.48, 1H), 6.91–6.93 (m, 1H), 7.12–7.13 (d,  $J$  = 4.8, 1H) ppm.

**<sup>13</sup>C NMR** (CDCl<sub>3</sub>, 150 Hz):  $\delta$  = 22.3, 35.1, 43.5, 116.5, 122.5, 122.6, 126.4, 136.4, 151.2 ppm.

**IR** (neat):  $\nu$  = 3075, 2964, 2925, 1235, 993, 915, 847, 822, 692 cm<sup>-1</sup>.

**HRMS** (DART): calculated for C<sub>9</sub>H<sub>13</sub><sup>32</sup>S<sup>+</sup> = [M+H]<sup>+</sup>:  $m/z$  = 153.07380, found:  $m/z$  = 153.07387.

#### **(1,1-Dimethyl-3-buten-1-yl)-benzene (3l):**

Prepared from ether **1l** and allylborane **2b** (1.2 equiv) according to the general procedure with InOTf (2 mol%) in DCM (0.5 M) at –20 °C for 14 h. *The obtained analytical data of 3l fit accurately with the reported data.*<sup>6</sup>

Colorless liquid.

Yield: 40%.

#### **1-(1,1-Dimethyl-3-buten-1-yl)-4-methoxy-benzene (3m):**

Prepared from ether **1m** and allylborane **2b** (1.2 equiv) according to the general procedure with InOTf (2 mol%) in DCM (0.5 M) at –20 °C for 5 h.

Colorless liquid.

Yield: 78%.

**<sup>1</sup>H NMR** (CDCl<sub>3</sub>, 600 Hz):  $\delta$  = 1.28 (s, 6H), 2.33–2.34 (d,  $J$  = 6.9, 2H), 3.79 (s, 3H), 4.93–4.97 (m, 2H), 5.52–5.59 (m, 1H), 6.84–6.65 (d,  $J$  = 8.9, 2H), 7.25–7.47 (d,  $J$  = 8.9, 2H) ppm.

**<sup>13</sup>C NMR** (CDCl<sub>3</sub>, 150 Hz):  $\delta$  = 28.7, 36.9, 48.9, 55.2, 113.3, 116.8, 126.8, 135.7, 141.3, 157.3 ppm.

**IR** (neat):  $\nu$  = 3077, 2962, 1515, 1249, 1184, 1038, 911, 808 cm<sup>-1</sup>.

**HRMS (DART):** calculated for  $C_{13}H_{19}O^+ = [M+H]^+$ :  $m/z = 191.14359$ , found:  $m/z = 191.14370$ .

**4-(4,4,4-Triphenyl)-1-butane (3n):**

Prepared from ether **1n** and allylborane **2b** (1.2 equiv) according to the general procedure with InOTf (2 mol%) in DCM (0.5 M) at 25 °C for 30 min. *The obtained analytical data of 3n fit accurately with the reported data.*<sup>7</sup>

White solid.

Yield 95%.

**(3-Methyl-1,5-hexadien-1-yl)-benzene (3o-L):**

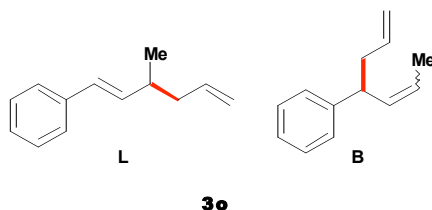

Prepared from ether **1o** and allylborane **2b** (1.2 equiv) according to the general procedure with InOTf (2 mol%) in DCM (0.5 M) at 25 °C for 30 min. *The obtained analytical data of 3o fit accurately with the reported data.*<sup>8</sup>

Colorless liquid.

Yield 93%, L:B = 1:1.

**1,5-Hexadien-1-yl-benzene (3p-L):**

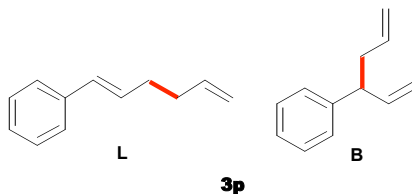

Prepared from ether **1p** and allylborane **2b** (1.2 equiv) according to the general procedure with InOTf (5 mol%) in DCM (0.5 M) at 25 °C for 14 h. *The obtained analytical data of 3p fit accurately with the reported data.*<sup>9</sup>

Colorless liquid.

Yield: 30%, L:B = 6:1.

**(3-Methyl-5-hexen-1-ynyl)benzene (3q-L):**

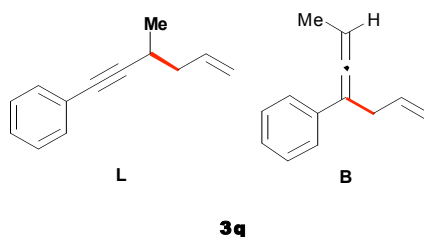

Prepared from ether **1q** and allylborane **2b** (1.2 equiv) according to the general procedure with InOTf (5 mol%) in DCM (0.5 M) at 25 °C for 5h. *The obtained analytical data of 3q fit accurately with the*

reported data.<sup>10</sup>

Colorless liquid.

Yield: 60%, L:B=12:1.

**1-Methyl-4-(1-methylethenyl)-6-(2-propenyl)-cyclohexene (3r):**

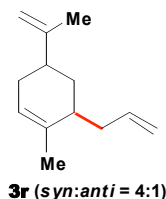

Prepared from ether **1r** and allylborane **2b** (1.2 equiv) according to the general procedure with InOTf (2 mol%) in DCM (0.5 M) at 25 °C for 14 h. *The obtained analytical data of 3r fit accurately with the reported data.*<sup>11</sup>

Colorless liquid.

Yield: 85%, *syn:anti* = 4:1.

***p*-4-Pentenylanisole (3t):**

Prepared from ether **1t** and allylborane **2b** (2.0 equiv) according to the general procedure with InOTf (5 mol%) under neat conditions at 60 °C for 48 h.

Colorless liquid.

Yield 58%.

<sup>1</sup>H NMR (CDCl<sub>3</sub>, 400 Hz): δ = 1.57–1.65 (m, 2H), 1.98–2.03 (m, 2H), 2.47–2.51 (t, *J* = 7.7, 2H), 3.70 (s, 3H), 4.88–4.97 (m, 2H), 5.70–5.80 (m, 1H), 6.73–6.76 (d, *J* = 8.7, 2H), 7.00–7.03 (d, *J* = 8.7, 2H) ppm.

<sup>13</sup>C NMR (CDCl<sub>3</sub>, 100 Hz): δ = 30.8, 33.2, 34.4, 55.2, 113.7, 114.6, 129.3, 134.5, 138.7, 157.7 ppm.

IR (neat): ν = 3073, 2962, 2834, 1244, 1038, 911, 828 cm<sup>-1</sup>.

HRMS (DART): calculated for C<sub>12</sub>H<sub>17</sub>O<sup>+</sup> = [M+H]<sup>+</sup>: *m/z* = 177.12794, found: *m/z* = 177.12837.

**1-Allyladamantane (3u):**

Prepared from ether **1u** and allylborane **2b** (1.2 equiv) according to the general procedure with InOTf (5 mol%) in DCM (0.5 M) at 25 °C for 14 h. *The obtained analytical data of 3u fit accurately with the reported data.*<sup>4</sup>

Colorless liquid.

Yield 73%.

## 4 References

1. C. L. C. Macdonald, A. M. Corrente, C. G. Andrews, A. Taylor and B. D. Ellis, *Chem. Commun.*, 2004, 250.
2. G. F. Fang, O. A. Wallner, N. D. Blasio, X. Ginesta, J. N. Harvey and V. K. Aggarwal, *J. Am. Chem.*

*Soc.*, 2007, **129**, 14632.

3. M. Noji, T. Ohno, N. Futaba, H. Tajima and K. Ishii, *J. Org. Chem.*, 2003, **68**, 9340.
4. T. Saito, Y. Nishimoto, M. Yasuda and A. Baba, *J. Org. Chem.*, 2006, **71**, 8516.
5. S. Datta, C.-L. Chang, K.-L. Yeh and R.-S. Liu, *J. Am. Chem. Soc.*, 2003, **125**, 9294.
6. M. Yasuda, T. Saito, M. Ueba and A. Baba, *Angew. Chem. Int. Ed.*, 2004, **43**, 1414.
7. S. K. De and R. A. Gibbs, *Tetrahedron Lett.*, 2005, **46**, 8345.
8. Y. Kataoka, I. Makihira, H. Akiyama and T. Tani, *Tetrahedron*, 1997, **53**, 9525.
9. For compound **3p-L**, see: Y. Sumida, S. Hayashi, K. Hirano, H. Yorimitsu and K. Oshima, *Org. Lett.*, 2008, **10**, 1629; for compound **3p-B**, see: M. J. S. Dewar and L. E. Wade Jr., *J. Am. Chem. Soc.*, 1977, **99**, 4417.
10. T. Schwier, M. Rubin and V. Gevorgyan, *Org. Lett.*, 2004, **6**, 1999.
11. J. S. Yadav, B. V. D. S. Reddy, K. V. Rao, K. S. Raj, P. R. Rao, A. R. Prasad and D. Gunasekar, *Tetrahedron Lett.*, 2004, **45**, 6505.

C:\Documents and Settings\delta\My Dr

shale\_pulse  
20-01-2010 00:51:24

1H  
shale\_pulsex2  
600.17 MHz

5.30 KHz  
5.47 Hz  
16384

11261.26 Hz  
8

1.4549 sec  
2.0000 sec  
6.50 usec

1H  
182 c  
CDCL3

0.00 ppm  
1.20 Hz  
42

DFILE  
COMNT  
DATIM  
OBNUC  
EXMOD  
OBFREQ  
OBSET  
OBFIN  
POINT  
FREQU  
SCANS  
ACQTM  
PWI  
IRNUC  
CTEMP  
SLVNT  
EXREF  
BF  
RGAIN

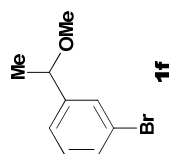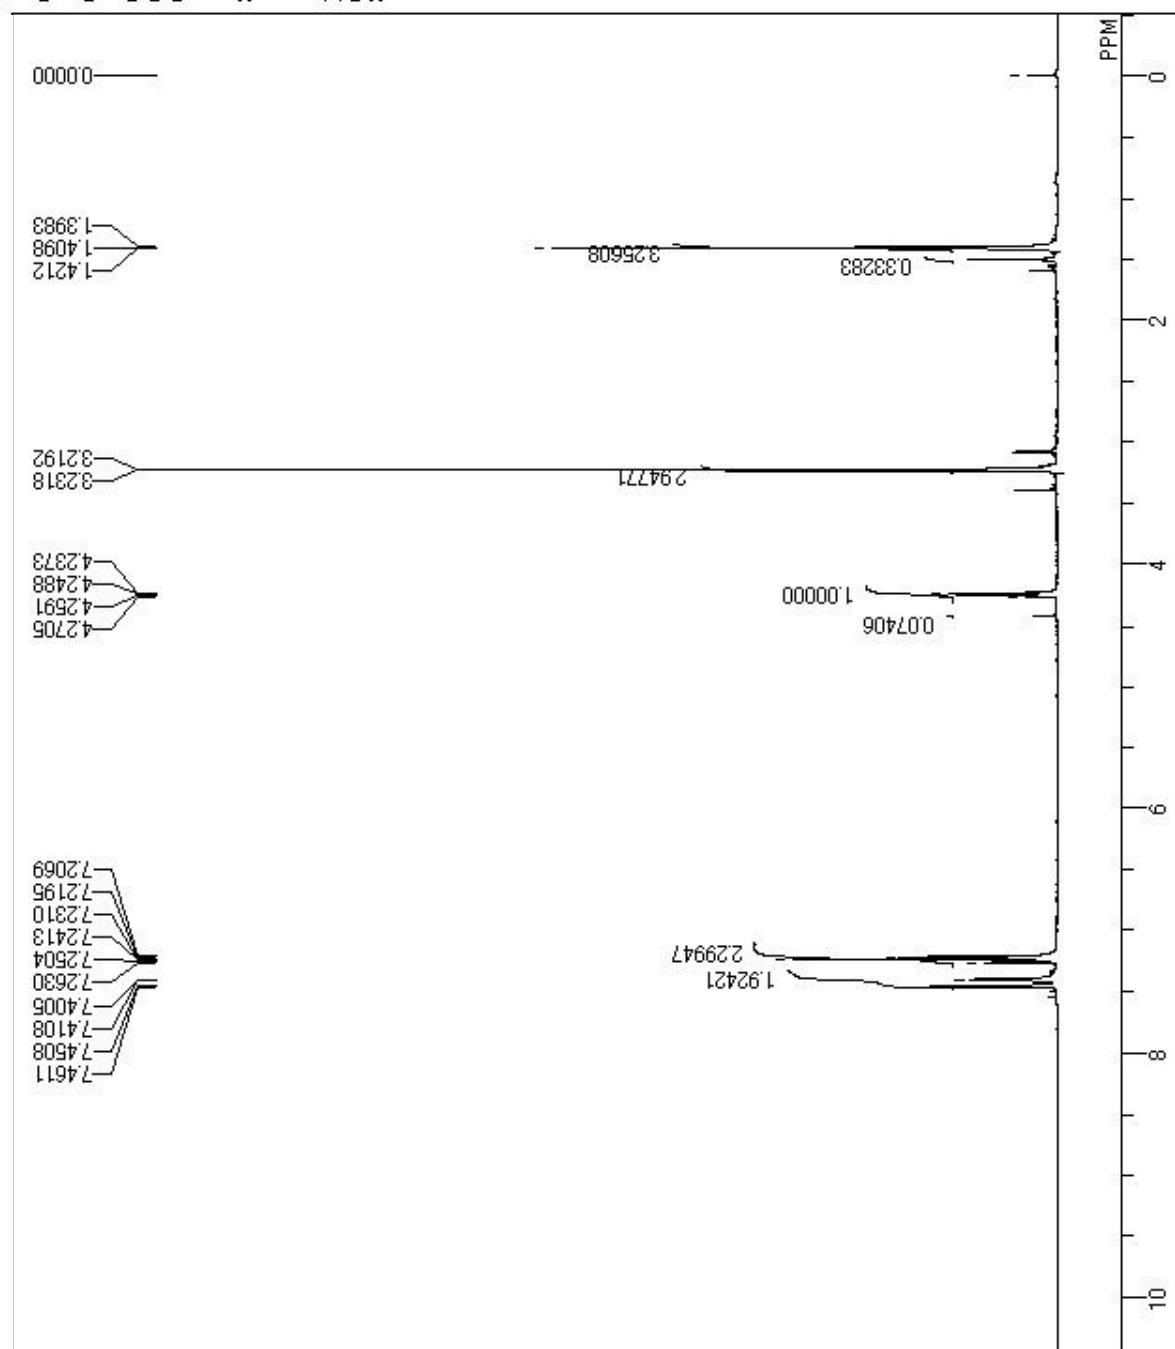

C:\Documents and Settings\delta\My Dr

DFILE  
COMNT  
DATIM  
OBNUC  
EXMOD  
OBFREQ  
OBSET  
OBFIN  
POINT  
FREQU  
SCANS  
ACQTM  
PD  
PWI  
IRNUC  
CTEMP  
SLVNT  
EXREF  
BF  
RGAIN

20-01-2010 00:59:55

13C

shield pulse dec

150.92 MHz

8.52 KHz

1.74 Hz

32768

47348.48 Hz

124

0.6921 sec

2.0000 sec

2.87 usec

1H

189 c

CDCL3

77.00 ppm

1.20 Hz

60

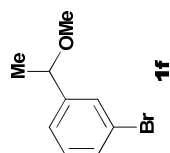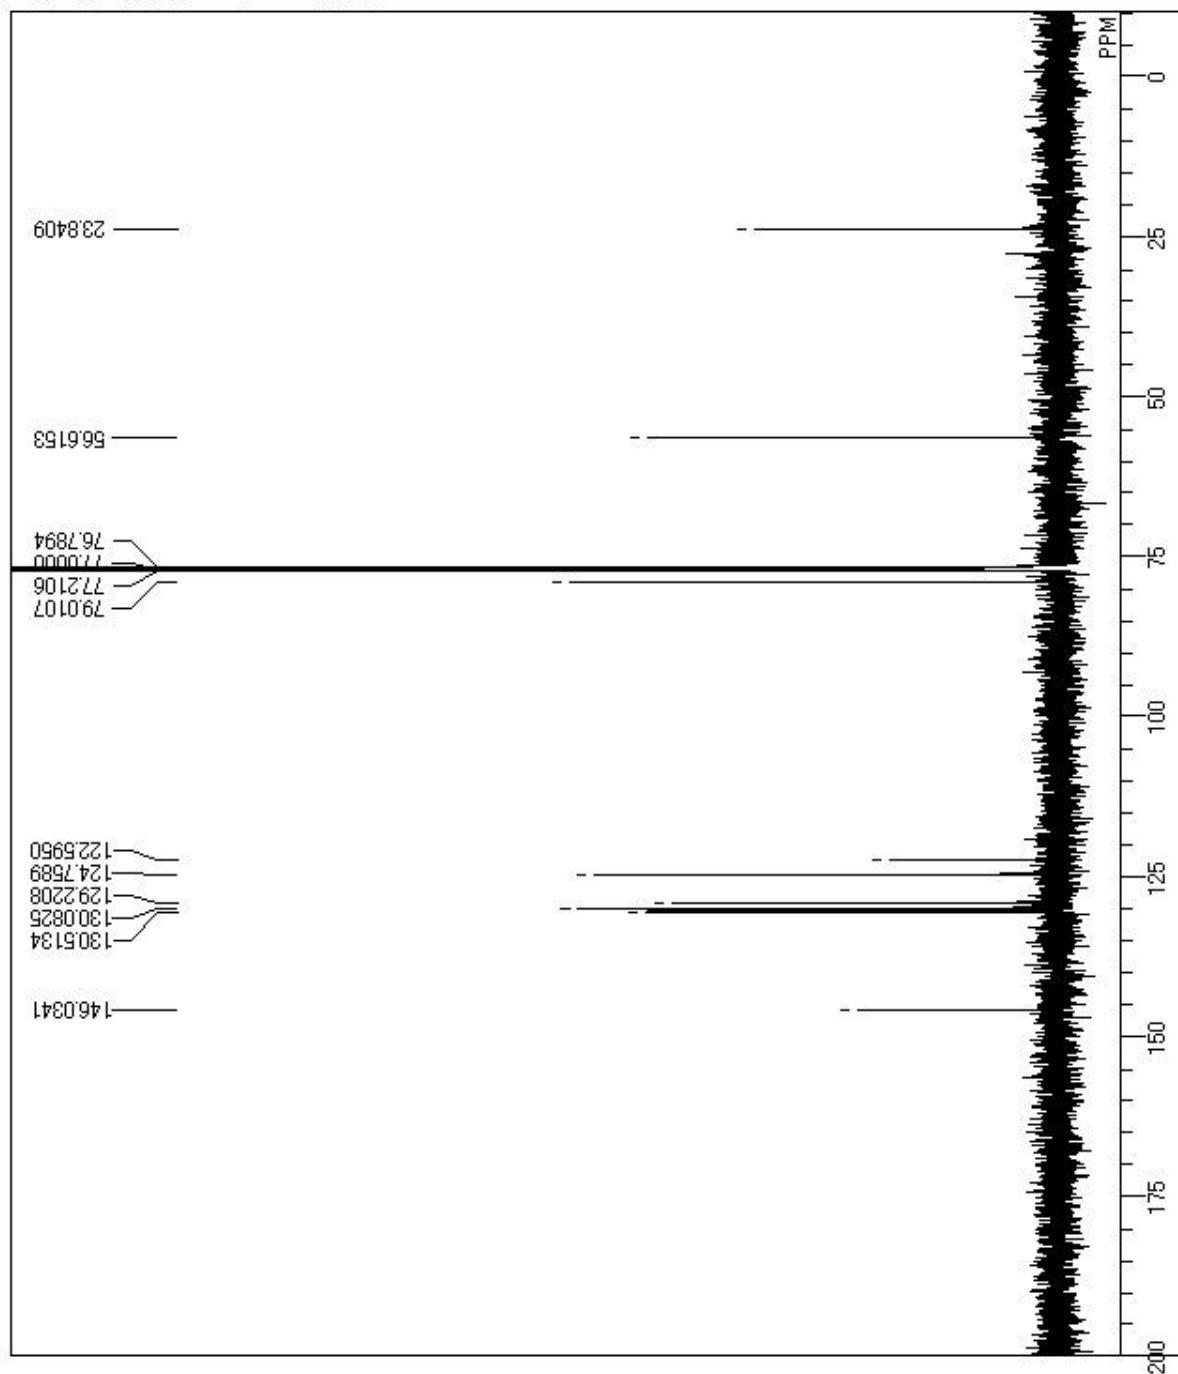

C:\Documents and Settings\delta\My Dr

DFILE  
COMNT  
DATIM  
OBNUC  
EXMOD  
OBFREQ  
OBSET  
OBFIN  
POINT  
FREQU  
SCANS  
ACQTM  
PD  
PWI  
IRNUC  
CTEMP  
SLVNT  
EXREF  
BF  
RGAIN

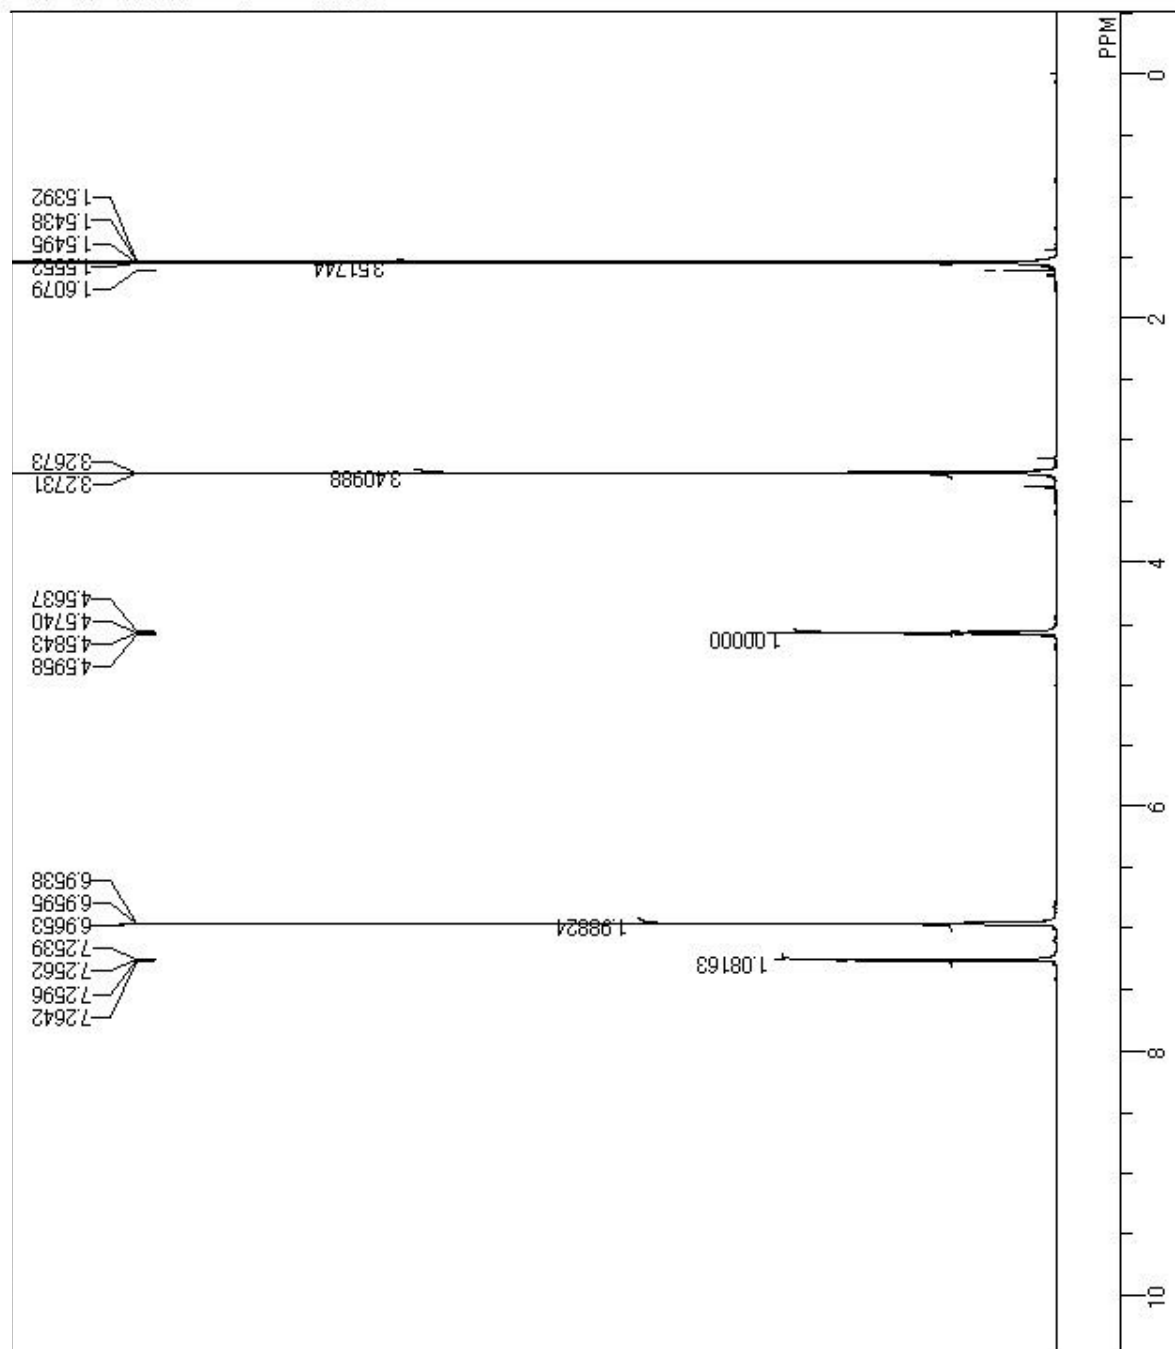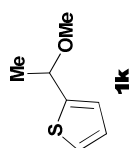

C:\Documents and Settings\delta\My D

DFILE  
COMNT  
DATIM  
OBNUC  
EXMOD  
OBFREQ  
OBSET  
OBFIN  
POINT  
FREQ  
SCANS  
ACQTM  
PD  
PWI  
IRNUC  
CTEMP  
SLVNT  
EXREF  
BF  
RGAIN

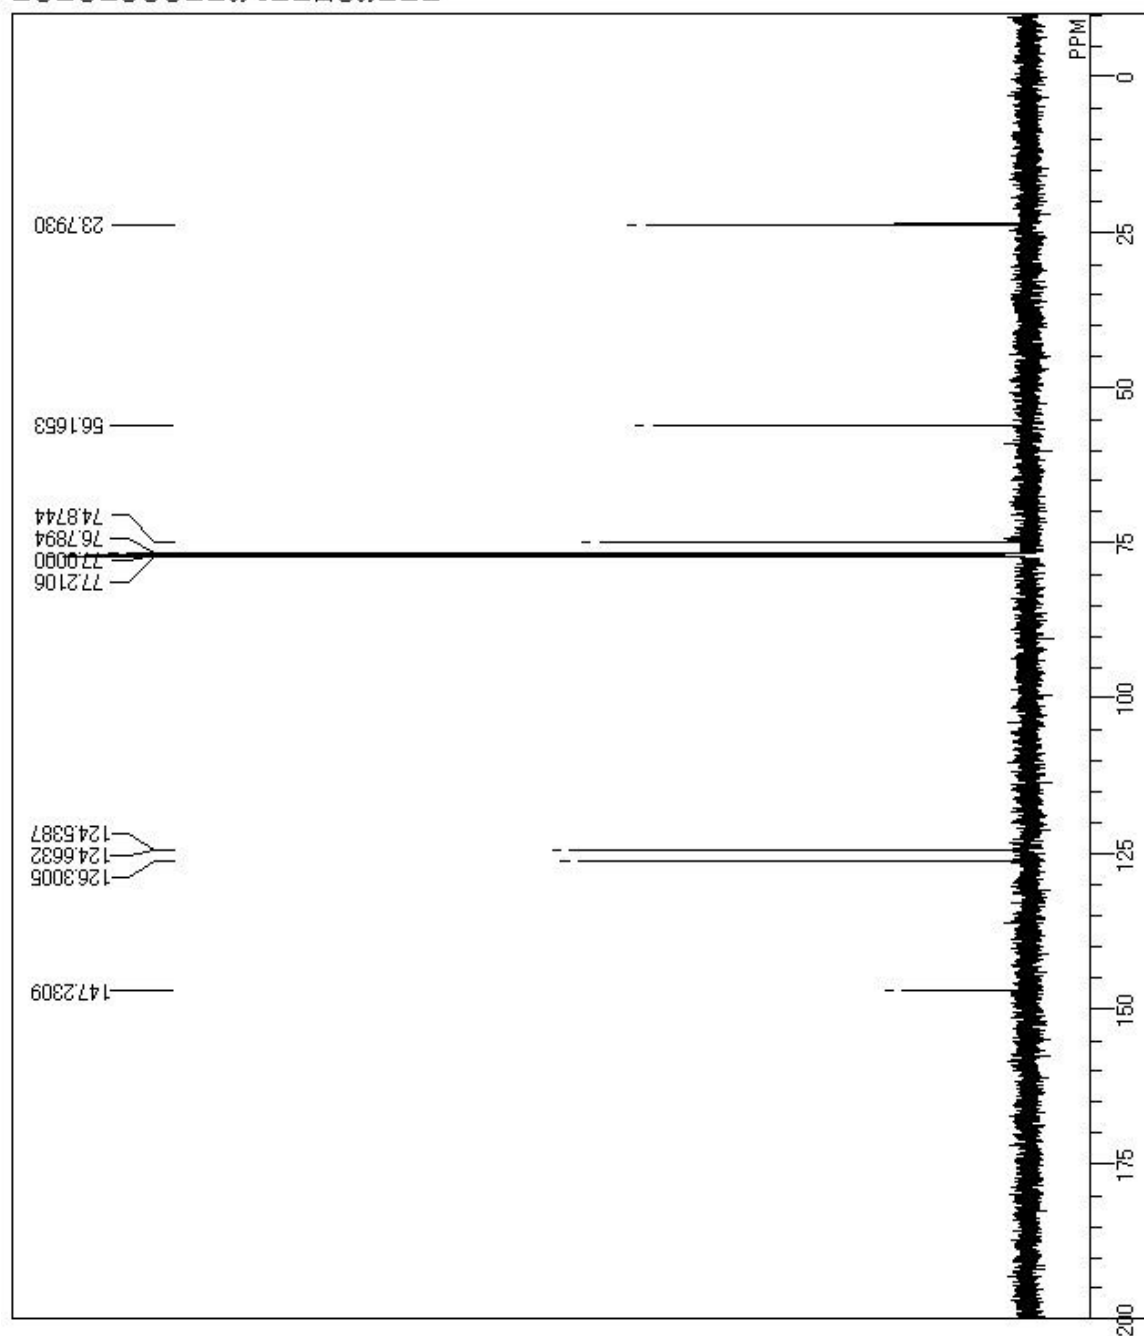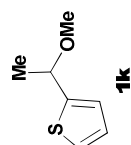

C:\Documents and Settings\delta\My Dr

shd\_pulse  
18-02-2010 03:49:58

1H  
shd\_pulsex2  
600.17 MHz

5.30 KHz  
5.47 Hz

16384  
11261.26 Hz

8  
1.4549 sec  
2.0000 sec

6.50 usec  
1H

181 c  
CDCL3

0.00 ppm  
1.20 Hz

38  
RGAIN

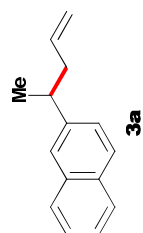

DFILE  
COMNT  
DATIM  
OBNUC  
EXMOD  
OBFREQ  
OBSET  
OBFIN  
POINT  
FREQU  
SCANS  
ACQTM  
PD  
PWI  
IRNUC  
CTEMP  
SLVNT  
EXREF  
BF  
RGAIN

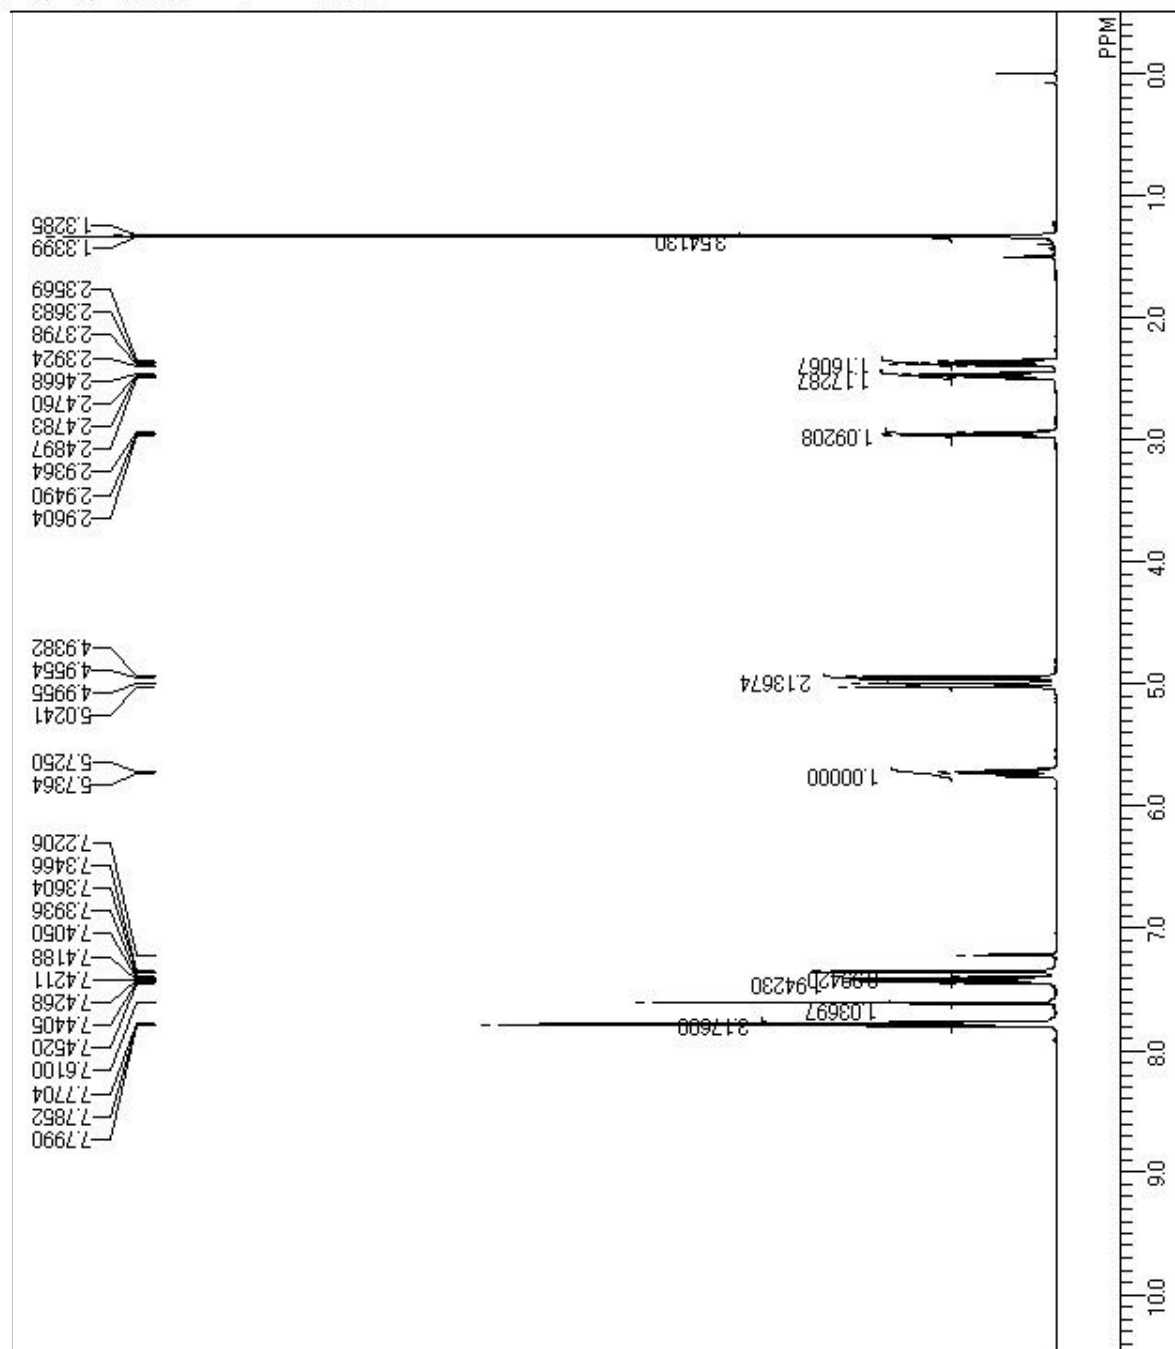

C:\Documents and Settings\delta\My Dr

dao 543-1 c  
22-01-2010 15:59:01

13C  
shie pulse dec  
100.53 MHz

5.35 KHz  
5.86 Hz

26214  
25125.24 Hz

54  
1.0433 sec

2.0000 sec  
350 usec

1H  
193 c

CDCL3  
0.00 ppm

1.20 Hz  
58

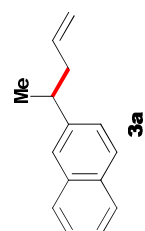

DFILE  
COMNT  
DATIM  
OBNUC  
EXMOD  
OBFRO  
OBSET  
OBFIN  
POINT  
FREQU  
SCANS  
ACQTM  
PD  
PWI  
IRNUC  
CTEMP  
SLVNT  
EXREF  
BF  
RGAIN

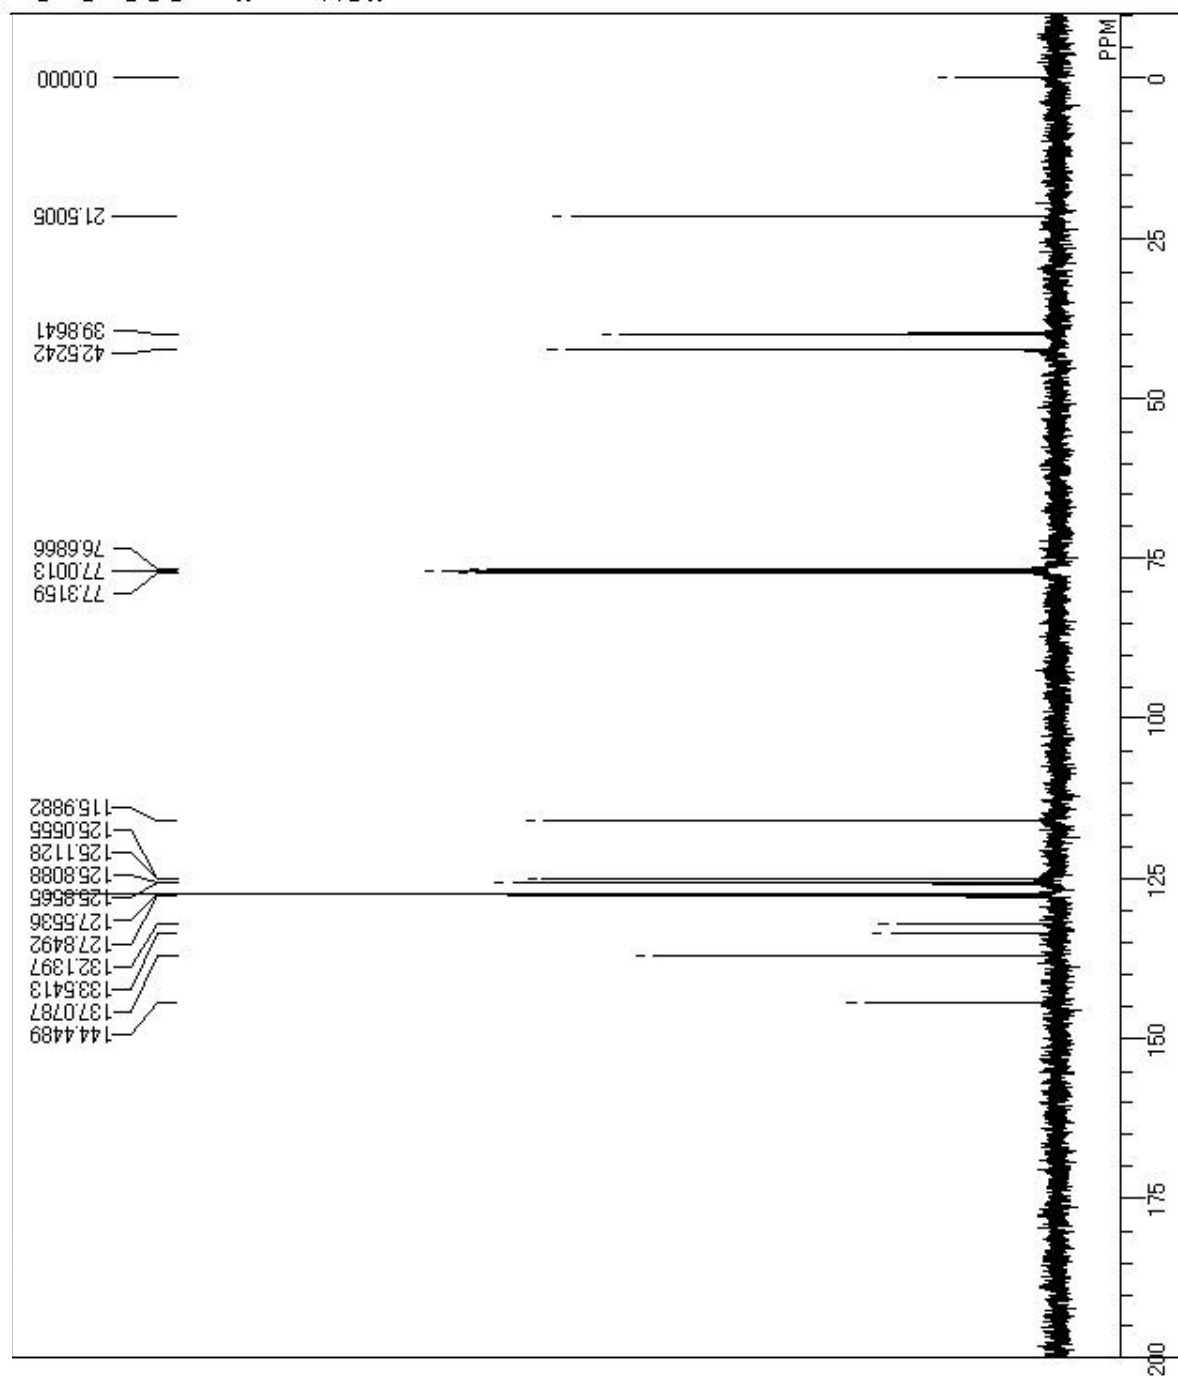

C:\Documents and Settings\delta\My D

DFILE  
COMNT  
DATIM  
OBNUC  
EXMOD  
OBFREQ  
OBSET  
OBFIN  
POINT  
FREQU  
SCANS  
ACQTM  
PD  
PW1  
IRNUC  
CTEMP  
SLVNT  
EXREF  
BF  
RGAIN

single pulse  
22-02-2010 03:07:59  
1H

single pulse  
600.17 MHz  
5.30 KHz  
5.47 Hz  
16384  
11261.26 Hz  
8  
1.4549 sec  
2.0000 sec  
6.50 usec  
1H  
18.1 c  
CDCL3  
0.00 ppm  
1.20 Hz  
42

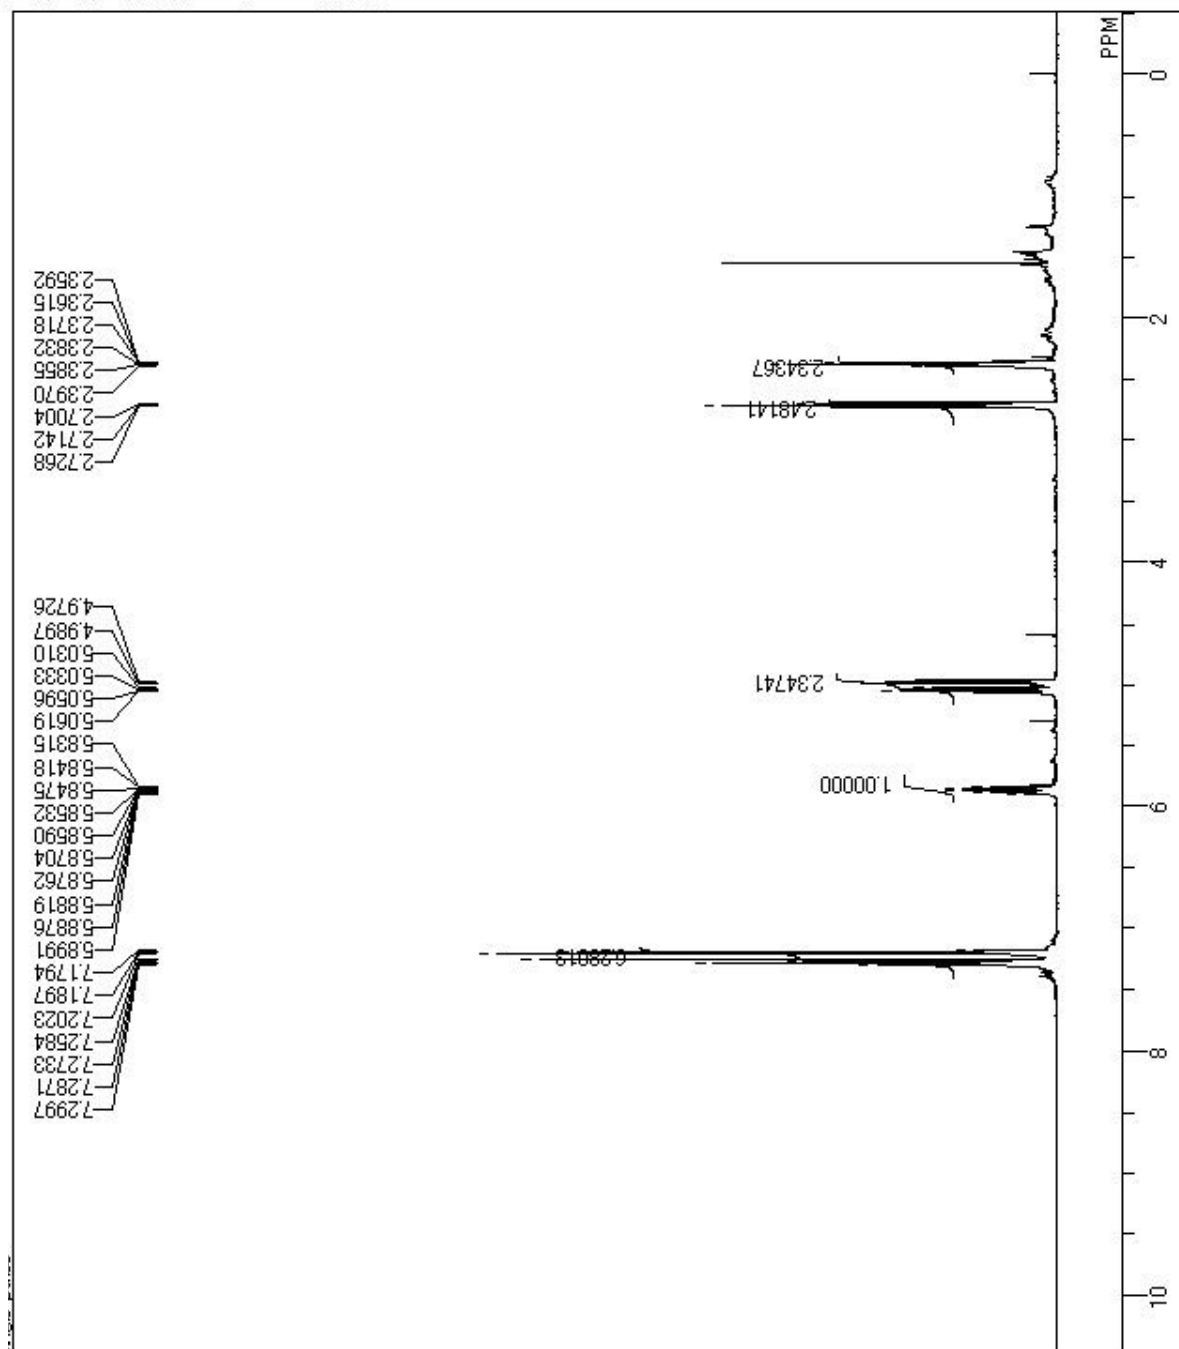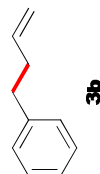

C:\Documents and Settings\delta\My Dr

DFILE  
COMNT  
DATIM  
OBNUC  
EXMOD  
OBFRQ  
OBSET  
OBFIN  
POINT  
FREQU  
SCANS  
ACQTM  
PD  
PWI  
IRNUC  
CTEMP  
SLVNT  
EXREF  
BF  
RGAIN

22-02-2010 03:24:47  
13C  
shie pulse dec  
150.92 MHz  
852 KHz  
1.74 Hz  
32768  
47348.48 Hz  
168  
0.6921 sec  
2.0000 sec  
2.87 usec  
1H  
192 c  
CDCL3  
77.00 ppm  
1.20 Hz  
60

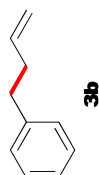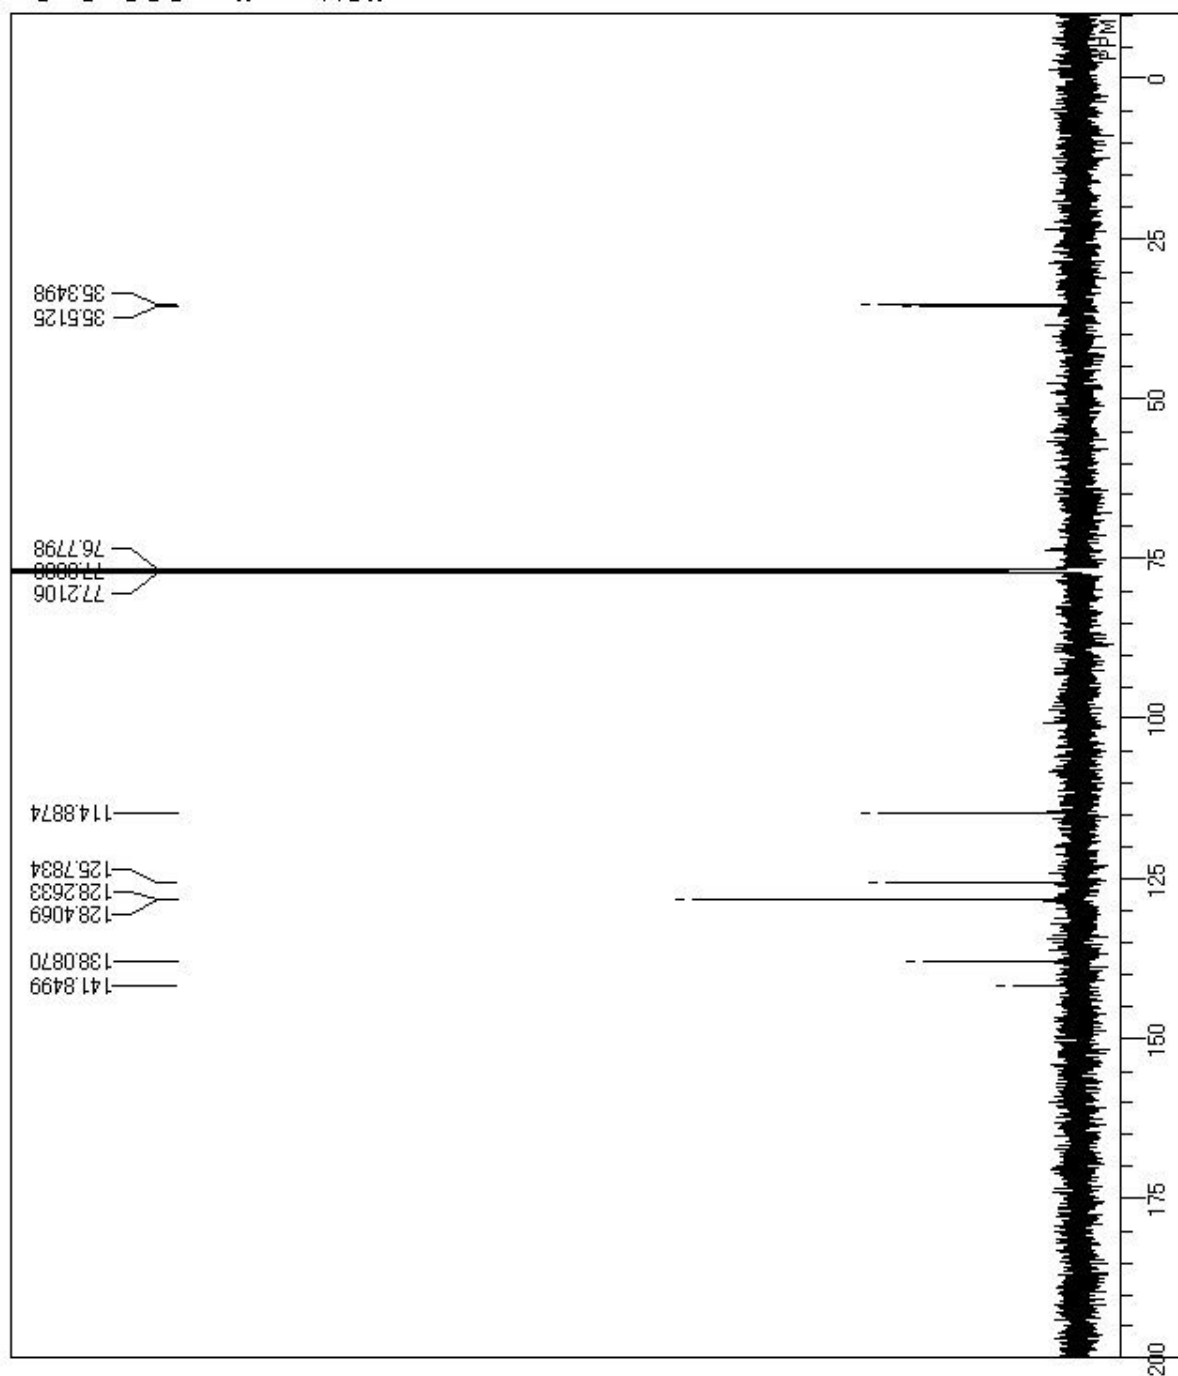

C:\Documents and Settings\delta\My D

DFILE  
COMNT  
DATIM  
DINUC  
EXMOD  
OBNUC  
OBFREQ  
OBFREQ  
OBFREQ  
POINT  
FREQ  
SCANS  
ACQTM  
PD  
PWI  
IRNUC  
CTEMP  
SLVNT  
EXREF  
BF  
RGAIN

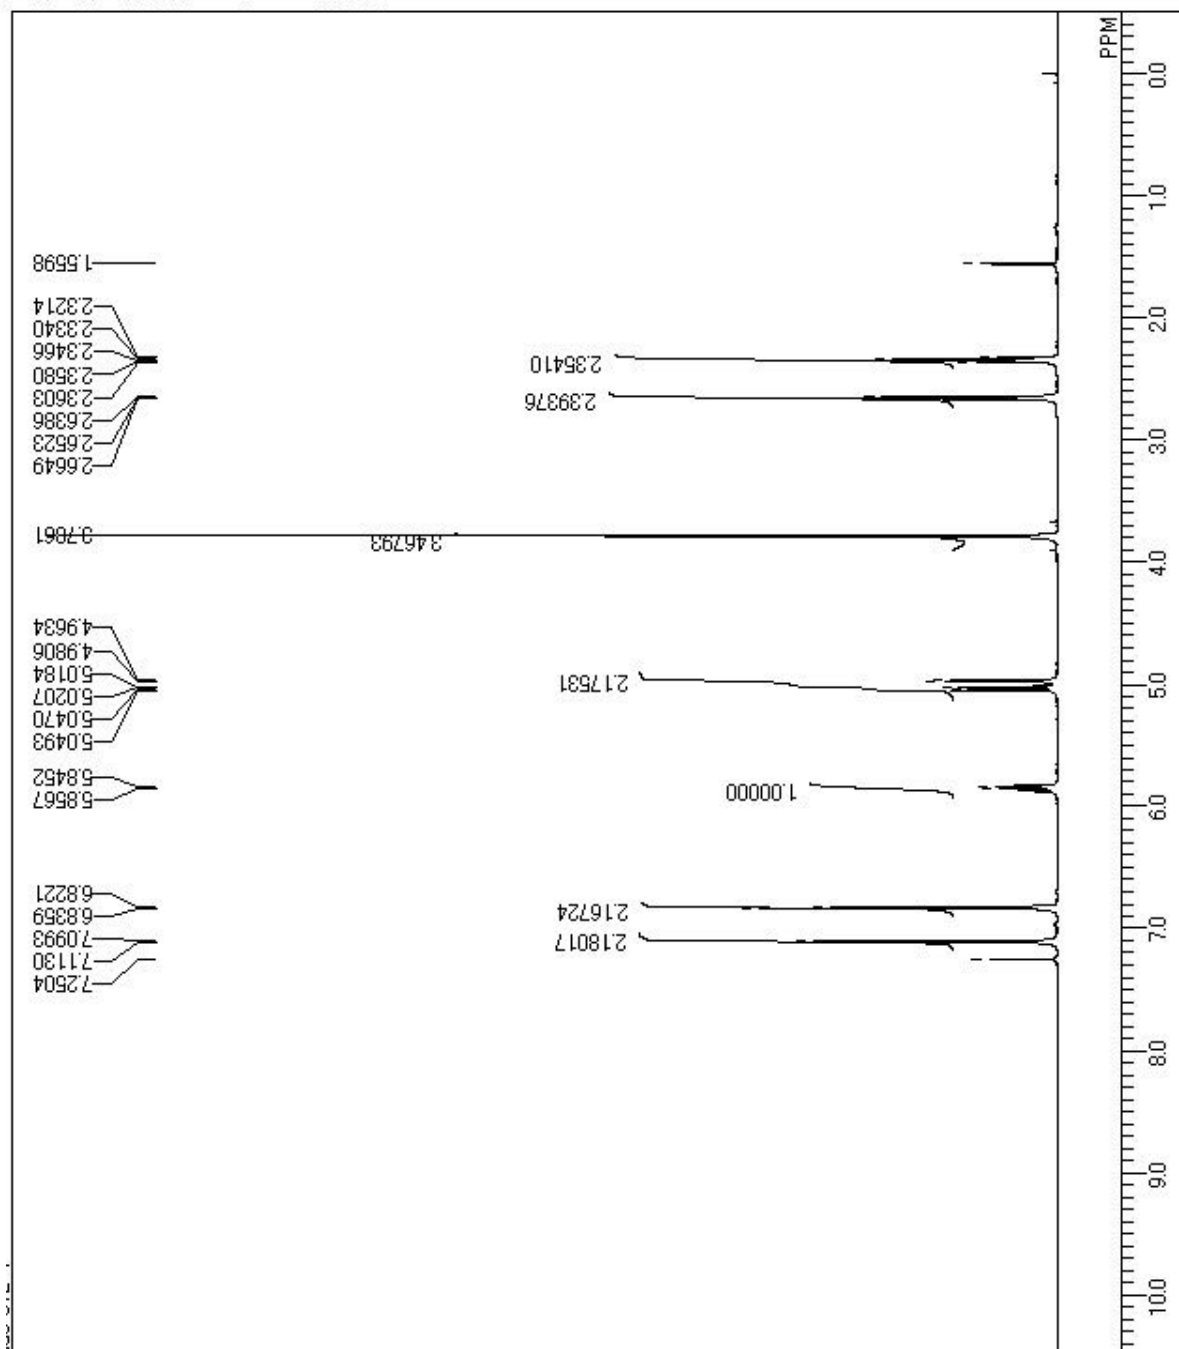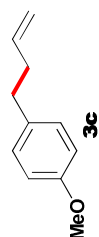

DFILE  
 COMNT  
 DATIM  
 OBNUC  
 EXMOD  
 OBFRQ  
 OBSET  
 OBFIN  
 POINT  
 FREQU  
 SCANS  
 ACQTM  
 PD  
 PW1  
 IRNUC  
 CTEMP  
 SLVNT  
 EXREF  
 BF  
 RGAIN

C:\Documents and Settings\delta\My Dr  
 dao 512-1 c2  
 17-12-2009 02:13:34  
 13C  
 single pulse dec  
 150.92 MHz  
 8.52 KHz  
 1.74 Hz  
 32768  
 47348.48 Hz  
 79  
 0.6921 sec  
 2.0000 sec  
 2.87 usec  
 1H  
 200 c  
 CDCL3  
 225.50 ppm  
 0.12 Hz  
 60

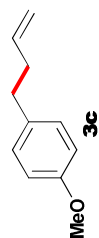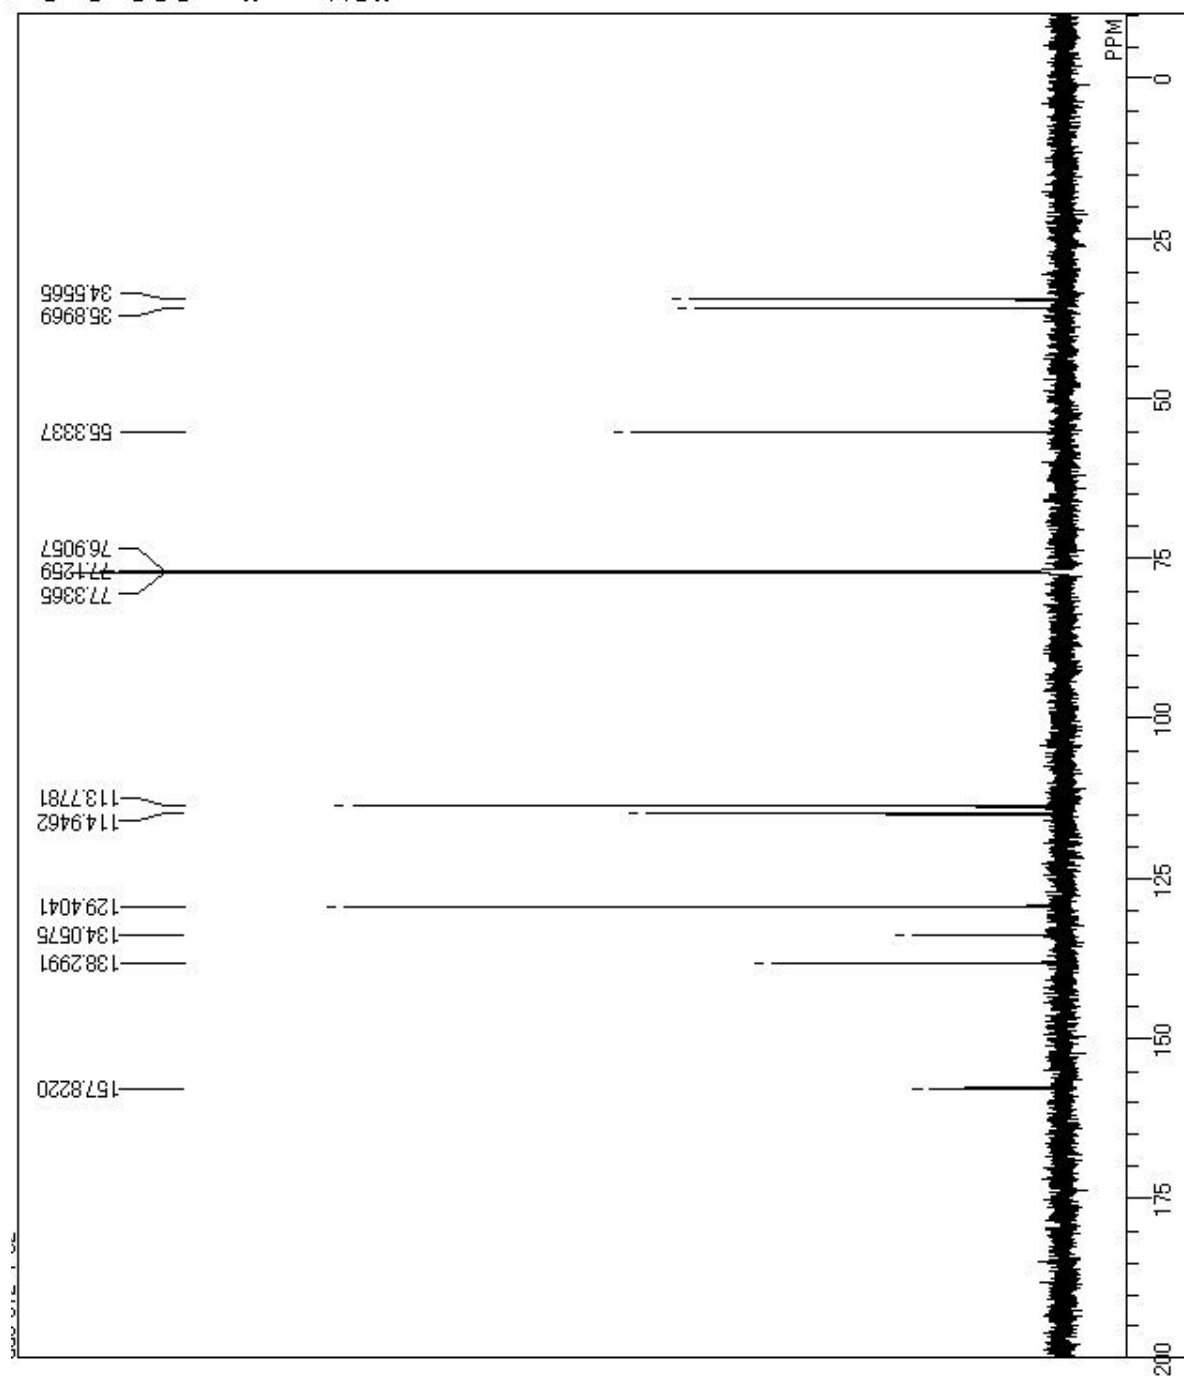

C:\Documents and Settings\delta\My Dc

27-07-2010 19:57:04

1H  
 single pulse  
 399.78 MHz  
 4.19 KHz  
 7.29 Hz  
 16384  
 7503.00 Hz  
 8  
 21837 sec  
 20000 sec  
 6.50 usec  
 1H  
 407.6 c  
 CDCL3  
 0.00 ppm  
 0.71 Hz  
 38

DFILE  
 COMNT  
 DATIM  
 OBNUC  
 EXMOD  
 OBFRQ  
 OBSET  
 OBFIN  
 POINT  
 FREQU  
 SCANS  
 ACQTM  
 PD  
 PW1  
 IRNUC  
 CTEMP  
 SLVNT  
 EXREF  
 BF  
 RGAIN

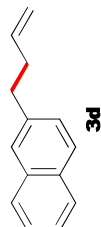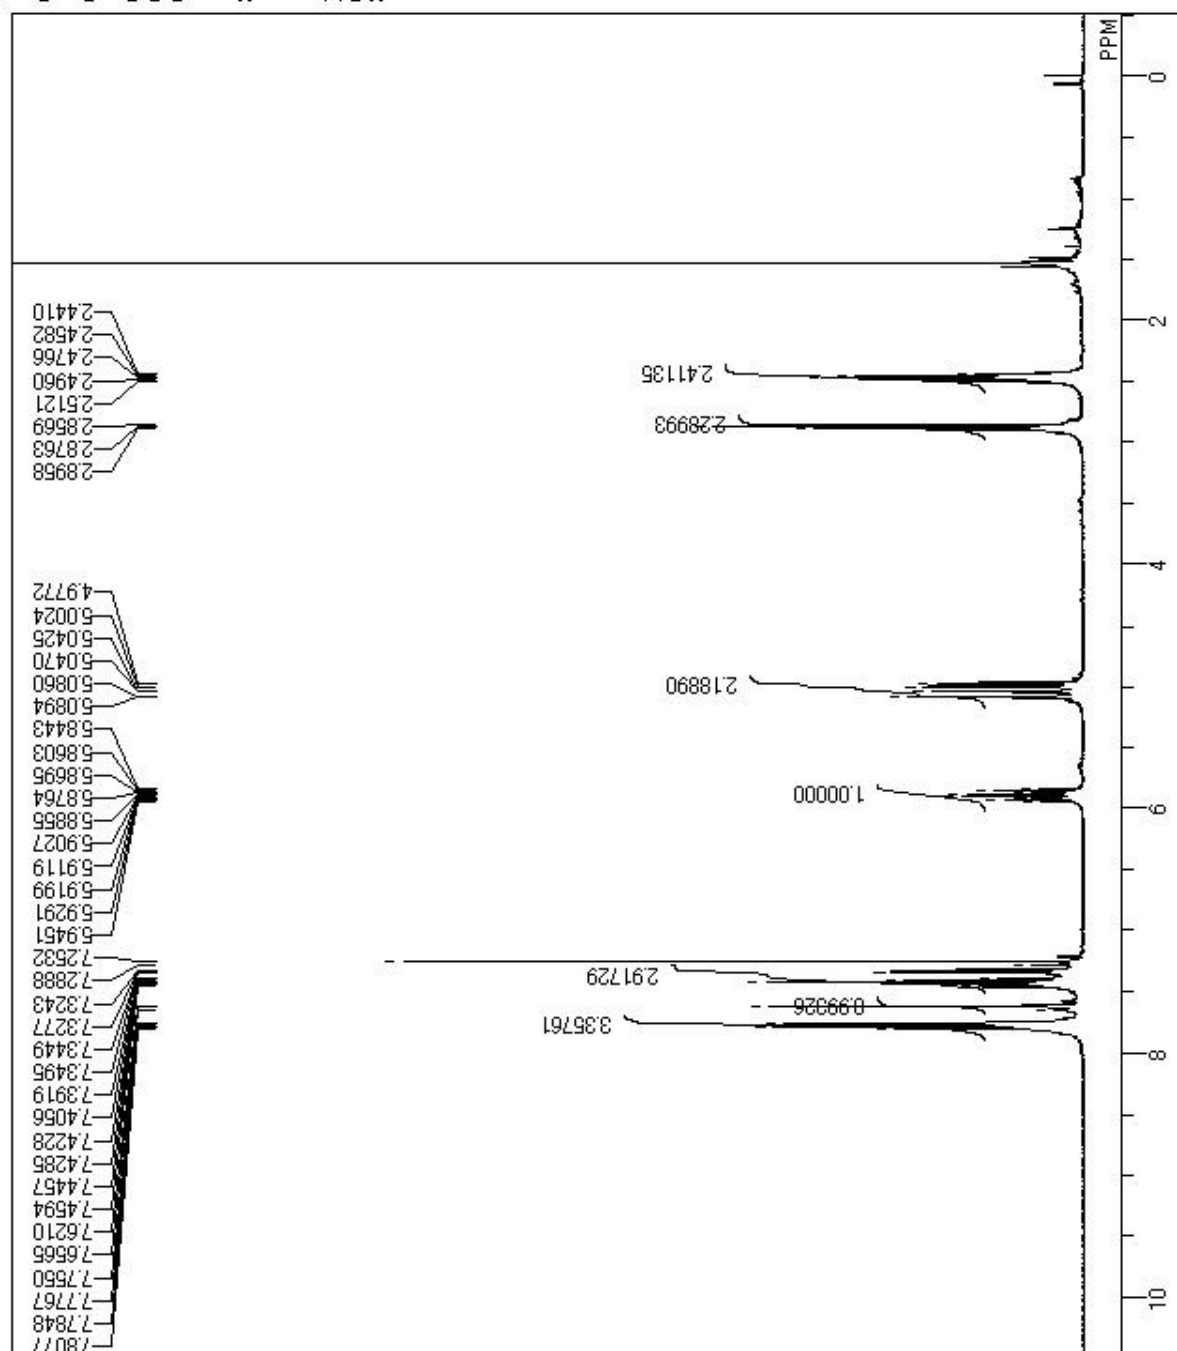

C:\Documents and Settings\delta\My Dr

DFILE  
COMNT  
DATIM  
OBNUC  
EXMOD  
OBFRQ  
OBSET  
OBFIN  
POINT  
FREQU  
SCANS  
ACQTM  
PD  
PW1  
IRNUC  
CTEMP  
SLVNT  
EXREF  
BF  
RGAIN

28-07-2010 21:52:14  
13C  
single pulse dec  
100.53 MHz  
5.35 KHz  
5.86 Hz  
32768  
31407.04 Hz  
326  
1.0433 sec  
2.0000 sec  
350 usec  
1H  
406.8 c  
CDCL3  
77.00 ppm  
0.71 Hz  
54

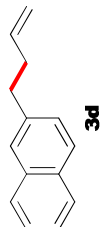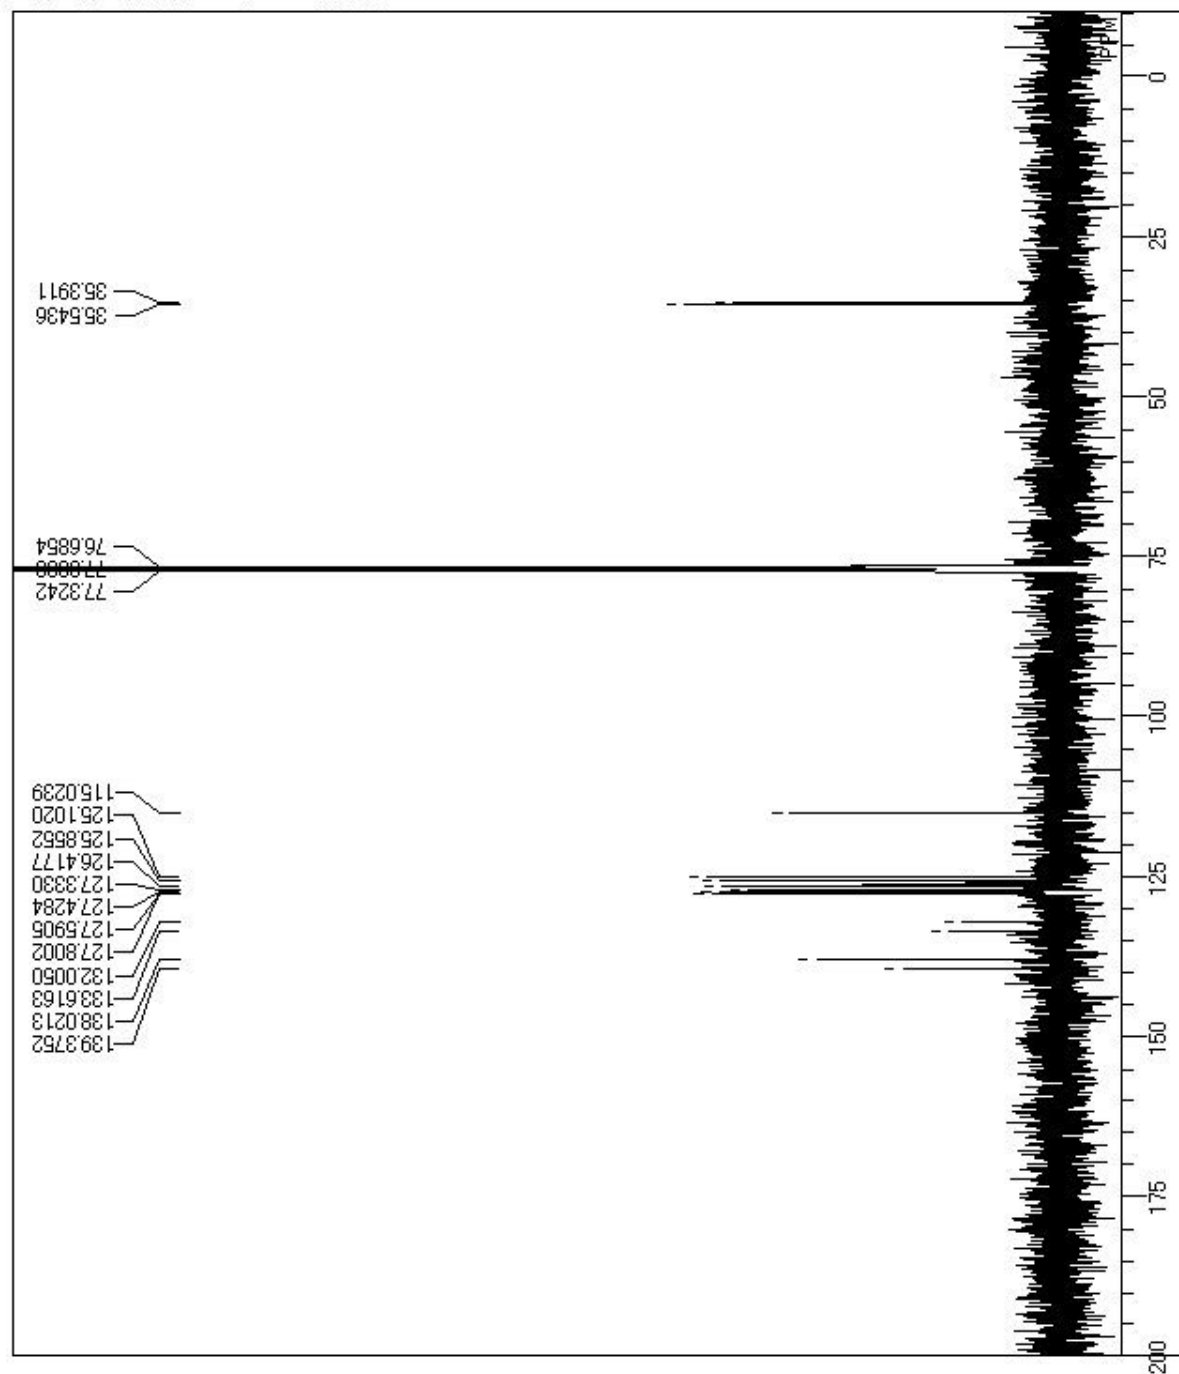

C:\Documents and Settings\delta\My Dr

DFILE  
COMNT  
DATIM  
OBNUC  
EXMOD  
OBFRQ  
OBSET  
OBFIN  
POINT  
FREQU  
SCANS  
ACQTM  
PD  
PWI  
IRNUC  
CTEMP  
SLVNT  
EXREF  
BF  
RGAIN

15-01-2010 06:10:03

1H  
shd\_pulsex2  
600.17 MHz  
5.30 KHz  
5.47 Hz  
16384  
11261.26 Hz  
8  
1.4549 sec  
2.0000 sec  
6.50 usec  
1H  
183 c  
CDCL3  
0.00 ppm  
1.20 Hz  
38

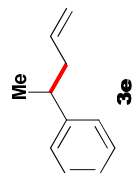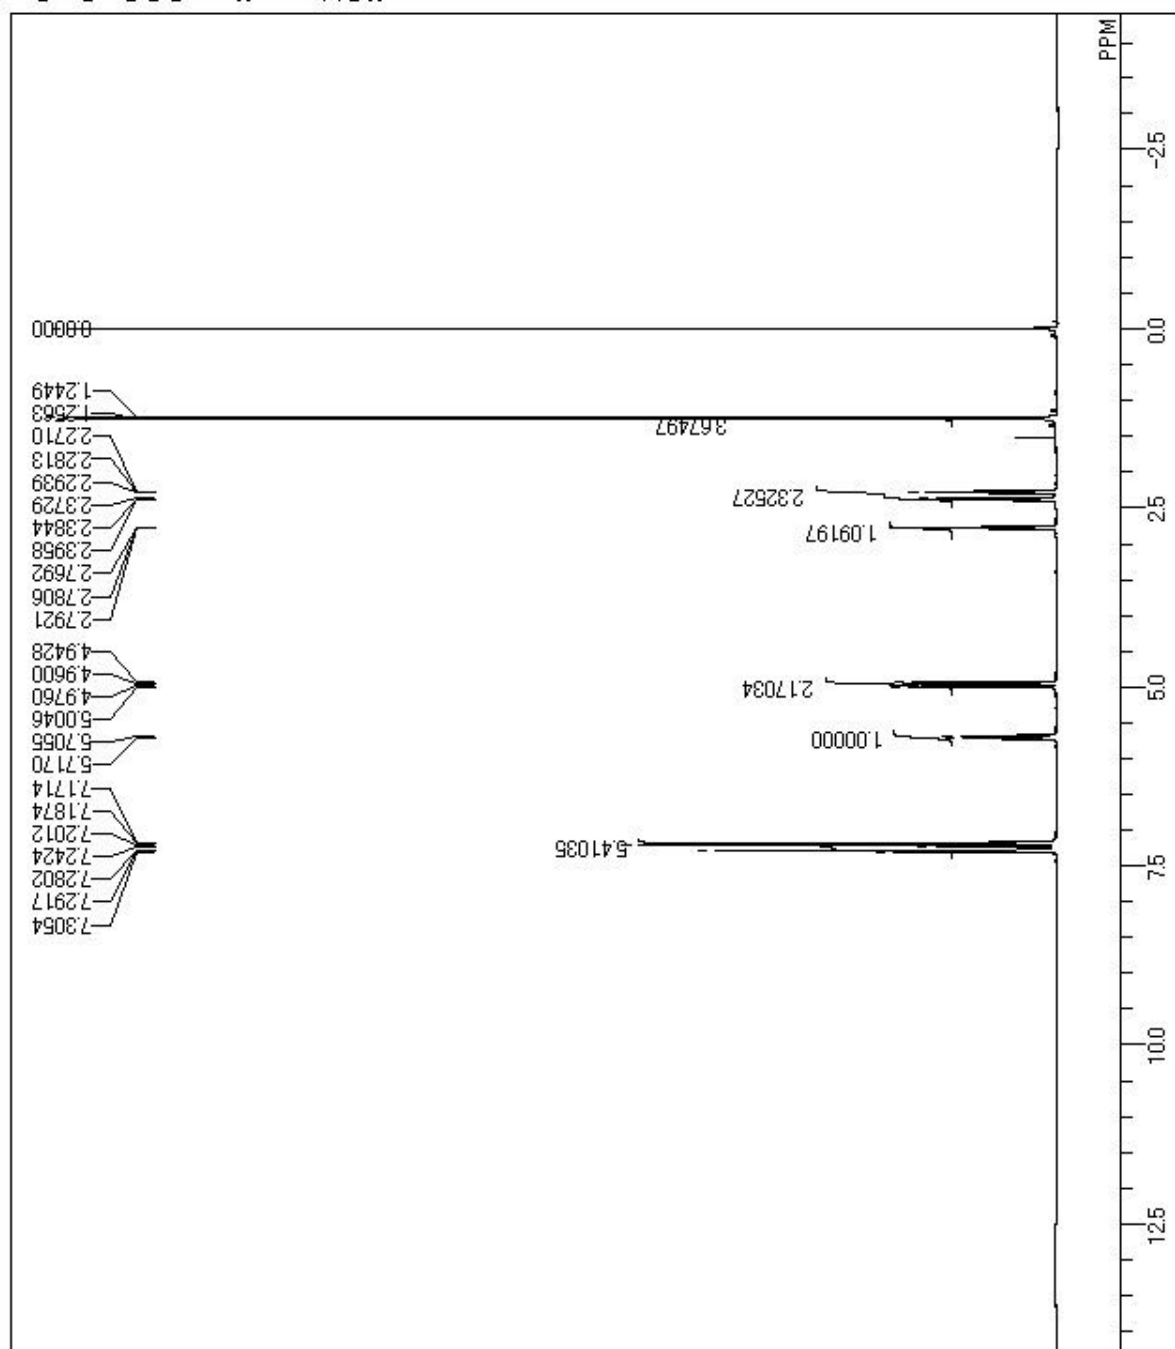

S-21

DFILE  
 COMNT  
 DATIM  
 OBNUC  
 EXMOD  
 OBFRQ  
 OBSET  
 OBFIN  
 POINT  
 FREQU  
 SCANS  
 ACQTM  
 PD  
 Pw1  
 IRNUC  
 CTEMP  
 SLVNT  
 EXREF  
 BF  
 RGAIN

C:\Documents and Settings\delta\My Dc  
 dao 511-1 c  
 17-12-2009 02:04:06  
 13C  
 snr pulse dec  
 150.92 MHz  
 852 KHz  
 1.74 Hz  
 32768  
 47348.48 Hz  
 79  
 0.6921 sec  
 2.0000 sec  
 2.87 usec  
 1H  
 198 c  
 CDCL3  
 77.00 ppm  
 0.12 Hz  
 60

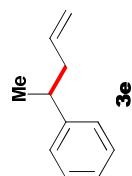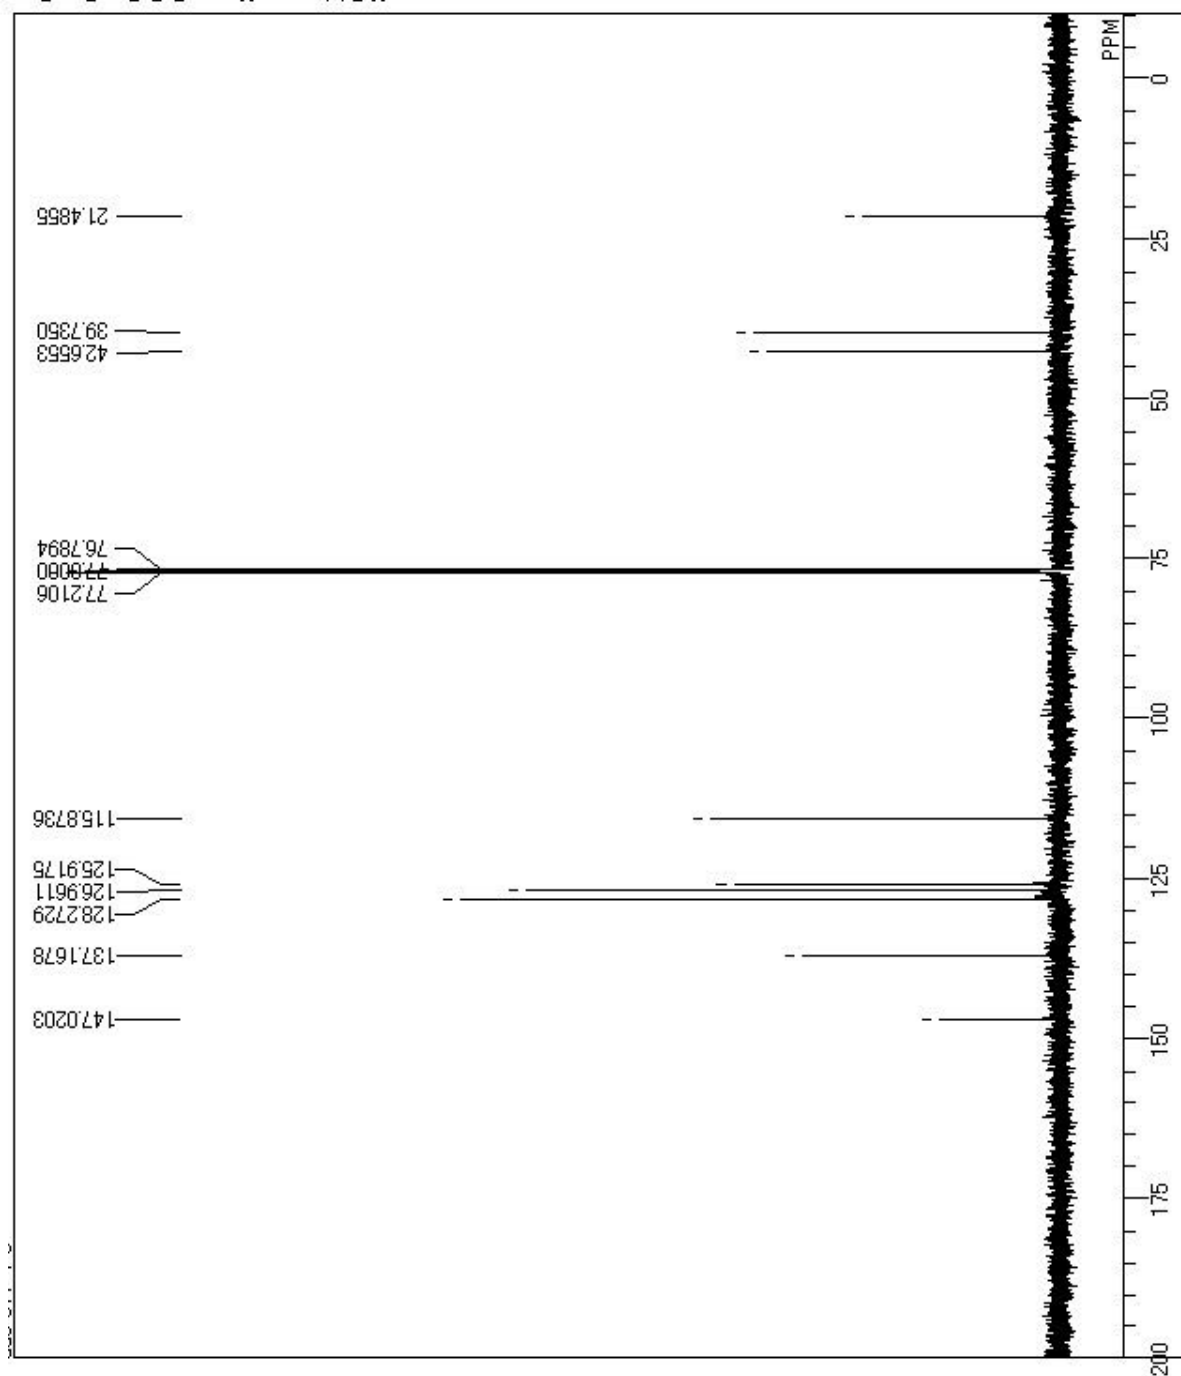

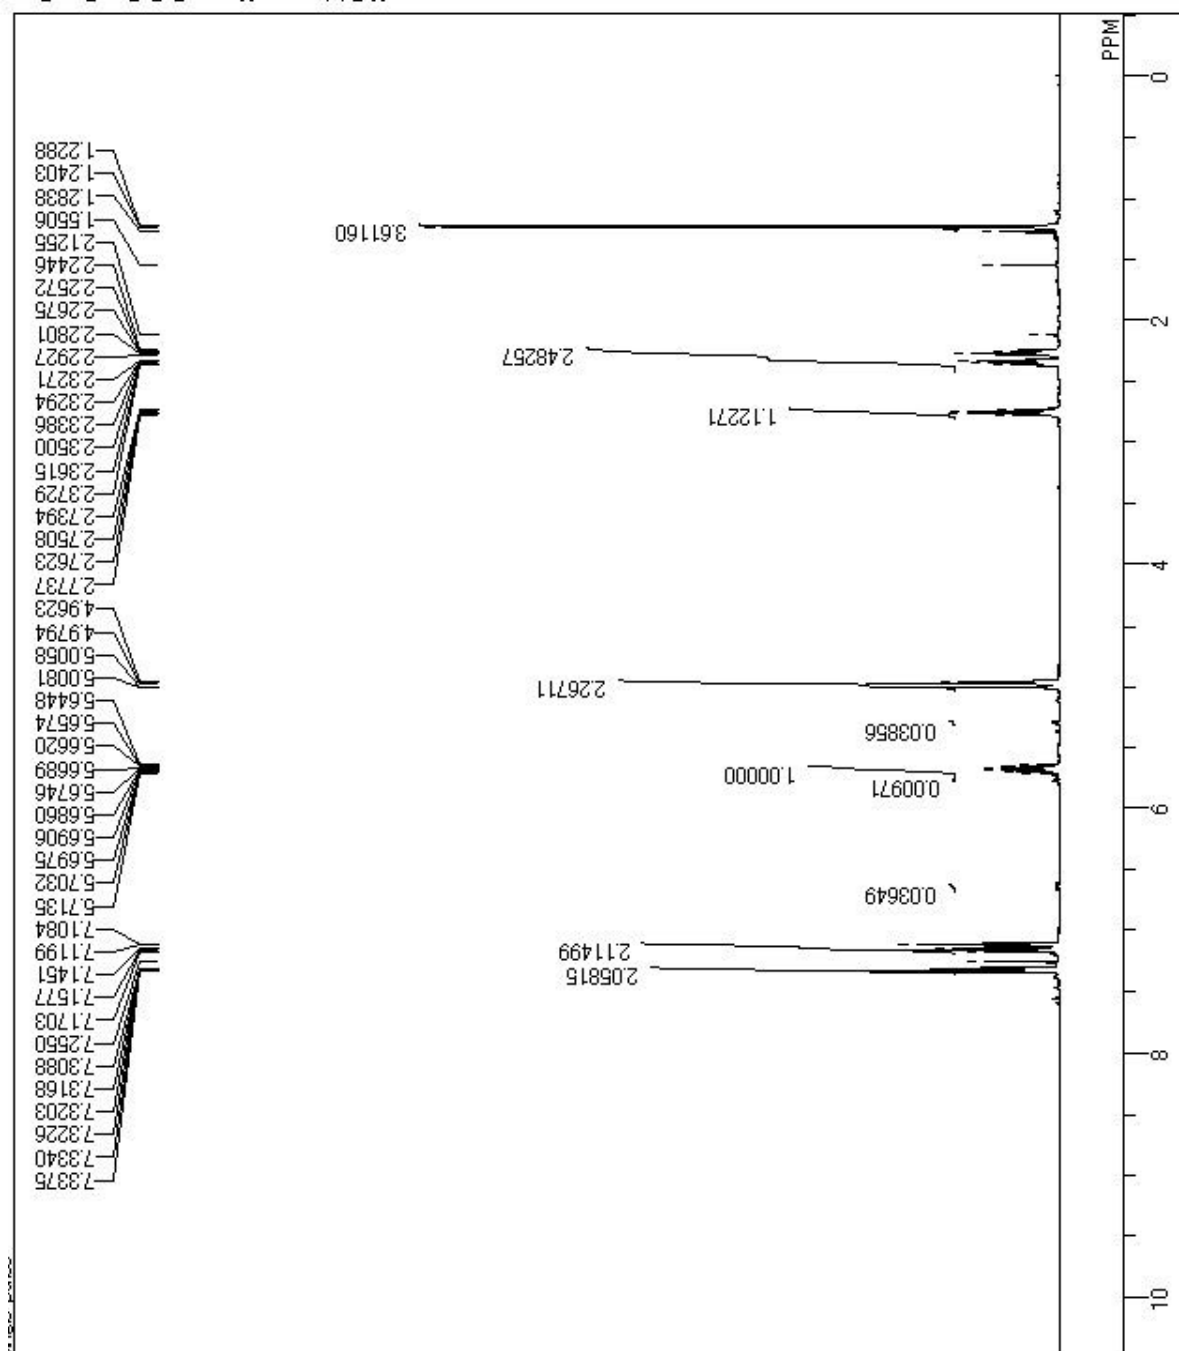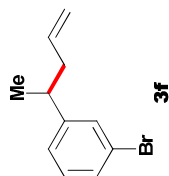

DFILE  
COMNT  
DATIM  
OBNUC  
EXMOD  
OBFREQ  
OBSET  
OBFIN  
POINT  
FREQU  
SCANS  
ACQTM  
PD  
PWI  
IRNUC  
CTEMP  
SLVNT  
EXREF  
BF  
RGAIN

22-02-2010 03:00:45

13C

single\_pulse\_dec

150.92 MHz

8.52 KHz

1.74 Hz

32768

47348.48 Hz

69

0.6921 sec

2.0000 sec

2.87 usec

1H

18.9 c

CDCL3

77.00 ppm

1.20 Hz

60

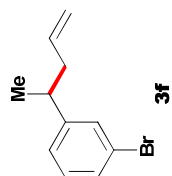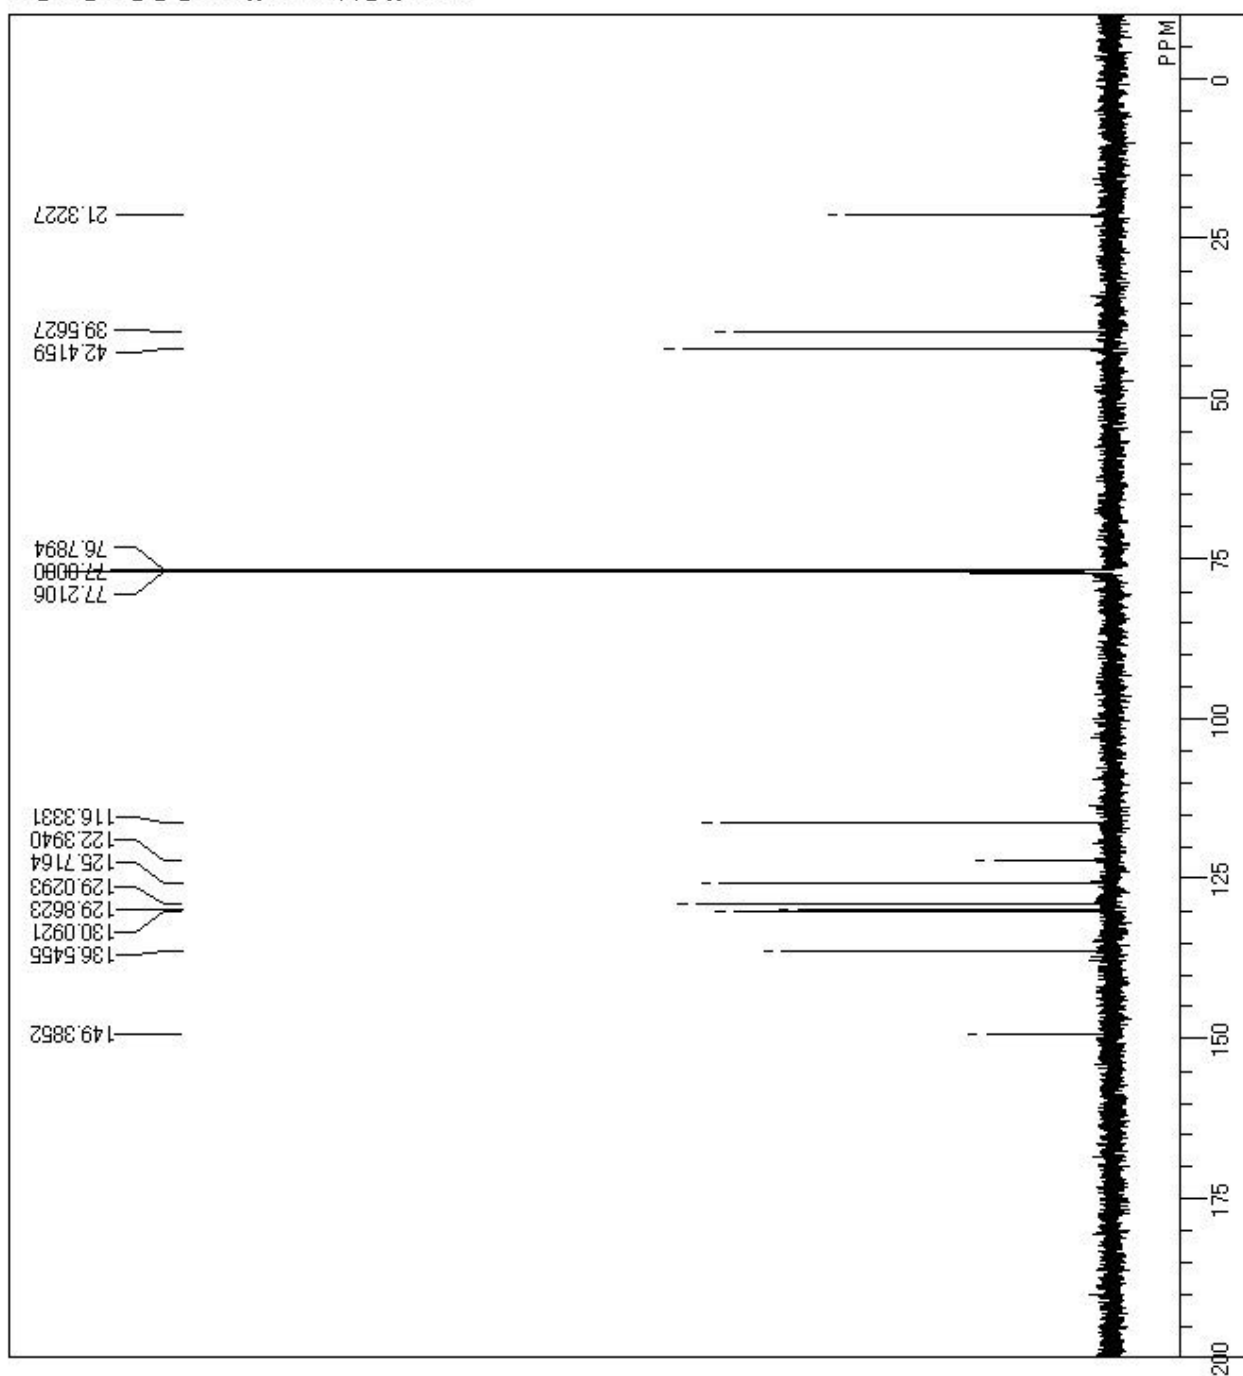



C:\Documents and Settings\delta\My I

DFILE  
COMNT  
DATIM  
OBNUC  
EXMOD  
OBFRQ  
OBSET  
OBFIN  
POINT  
FREQU  
SCANS  
ACQTM  
PD  
PWI  
IRNUC  
CTEMP  
SLVNT  
EXREF  
BF  
RGAIN

14-06-2010 20:42:08  
13C  
single\_pulse\_dec  
150.92 MHz  
8.52 KHz  
1.74 Hz  
32768  
47348.48 Hz  
152  
0.6921 sec  
2.0000 sec  
2.87 usec  
1H  
22.9 c  
CDCL3  
77.00 ppm  
0.12 Hz  
60

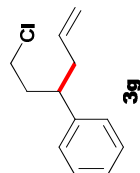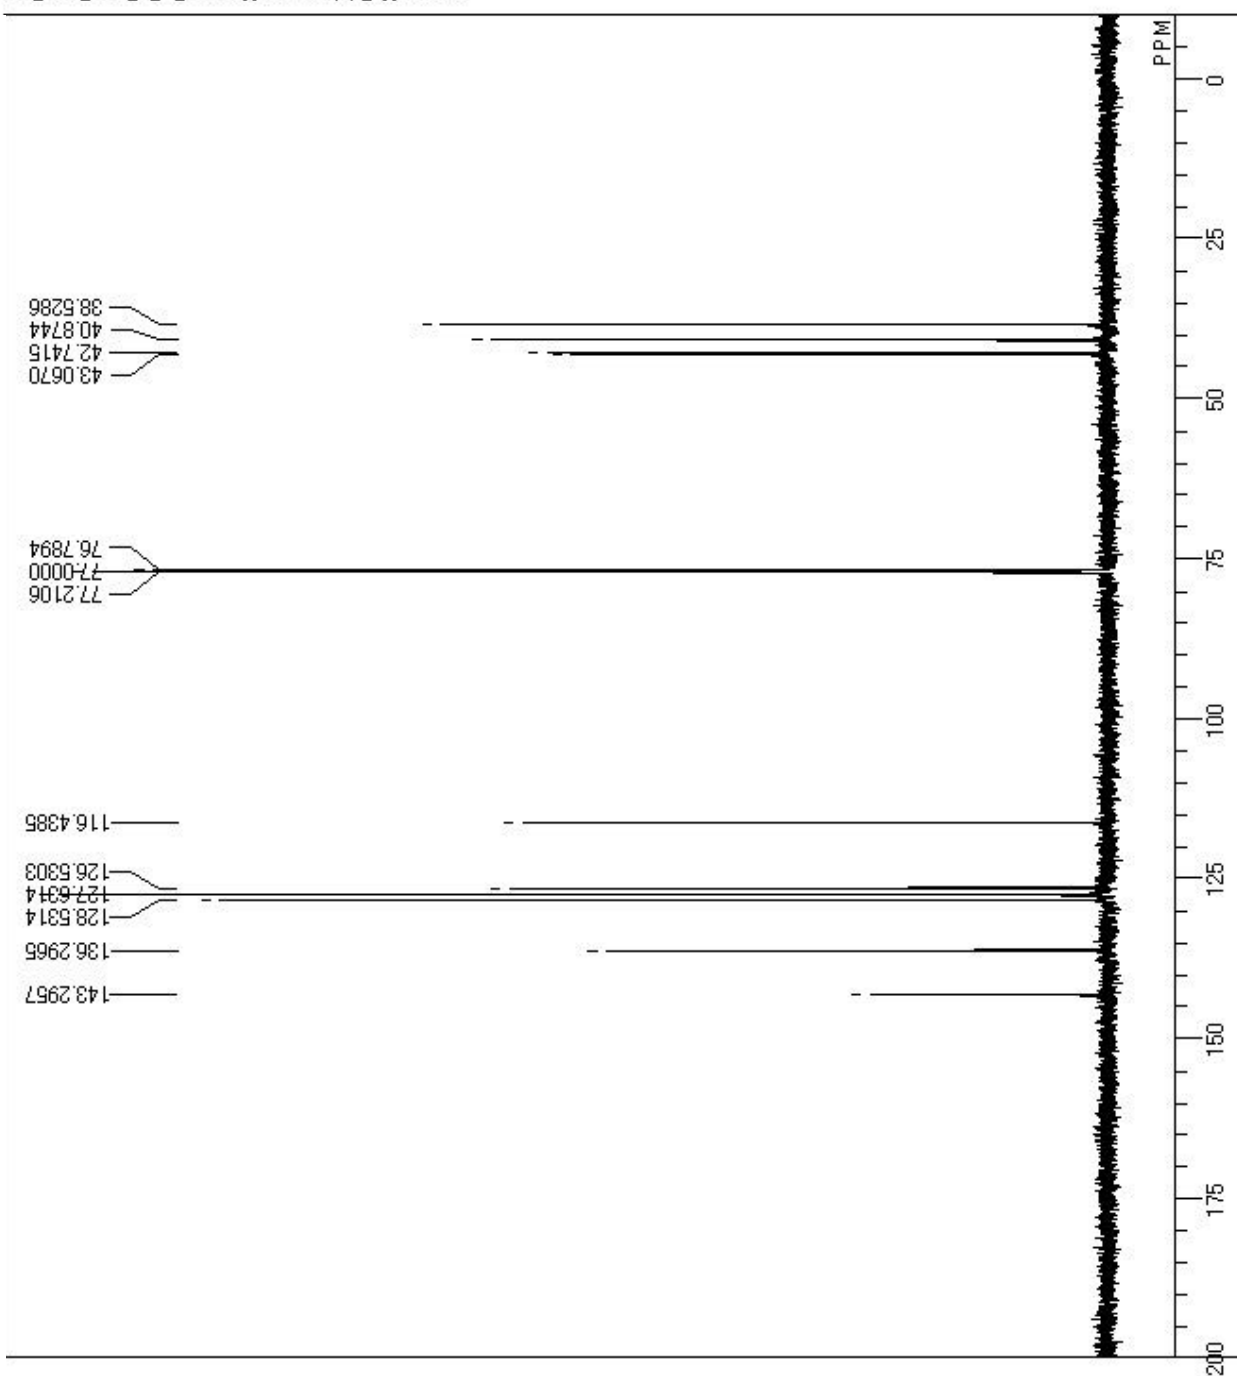

C:\Documents and Settings\delta\My Dr

DFILE  
COMNT  
DATIM  
OBNUC  
EXMOD  
OBFREQ  
OBSET  
OBFIN  
POINT  
FREQU  
SCANS  
ACQTM  
PD  
PWT  
IRNUC  
CTEMP  
SLVNT  
EXREF  
BF  
RGAIN

1.602  
1.6251  
1.6274  
1.6319  
1.6365  
1.6411  
1.6468  
1.6537  
1.7362  
1.7407  
1.7488  
1.7522  
1.7579  
1.7614  
2.2389  
2.2492  
2.2549  
2.2630  
2.4015  
2.4096  
2.4118  
2.4199  
2.4222  
2.4256  
2.4336  
2.4359  
2.6592  
2.6730  
2.6856  
2.6959  
2.7772  
2.7852  
2.7932  
2.8012  
4.9554  
4.9703  
4.9726  
4.9989  
5.7445  
5.7571  
5.7616  
5.7731  
6.9836  
6.9950  
7.0053  
7.0168  
7.0294  
7.0317  
7.0363  
7.0489  
7.0603  
7.1199  
7.1325  
7.1622

smile\_pulse  
24-02-2010 00:59:37  
1H  
smile\_pulsex2  
600.17 MHz  
5.30 KHz  
5.47 Hz  
16384  
11261.26 Hz  
8  
1.4549 sec  
2.0000 sec  
6.50 usec  
1H  
18.4 c  
CDCL3  
0.00 ppm  
1.20 Hz  
36

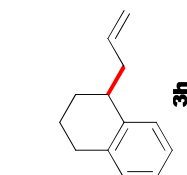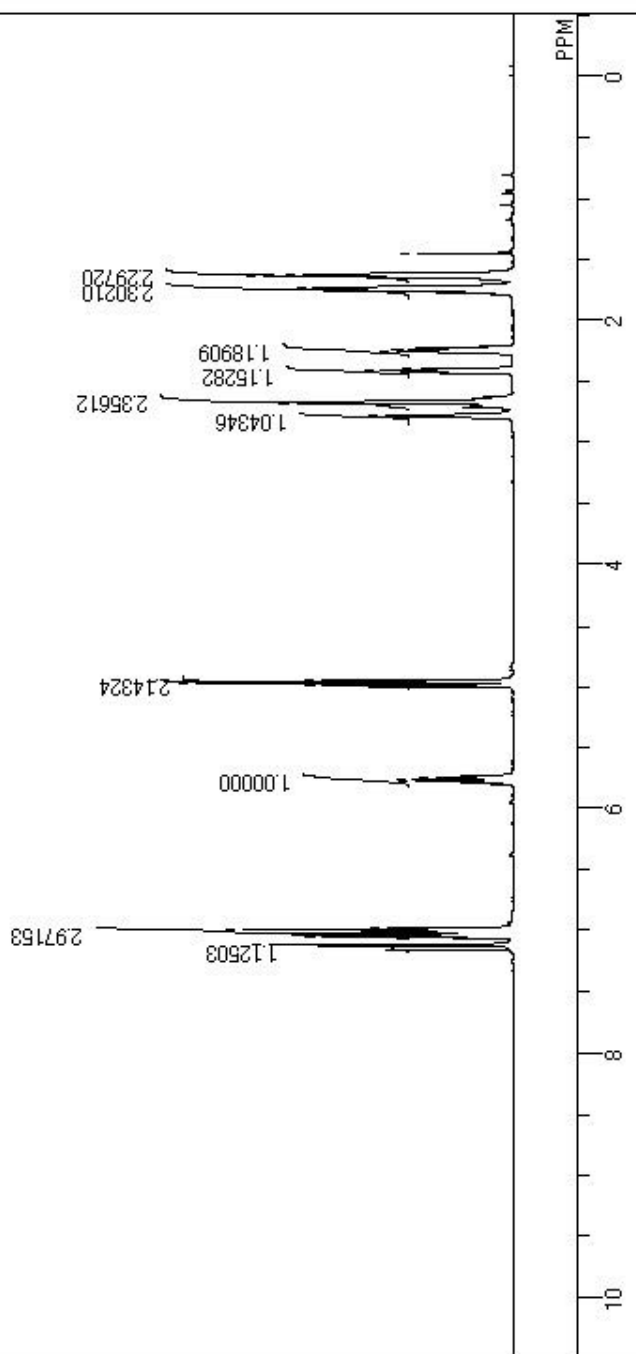

C:\Documents and Settings\delta\My Dr

DFILE  
COMNT  
DATIM  
OBNUC  
EXMOD  
OBFRO  
OBSET  
OBFIN  
POINT  
FREQU  
SCANS  
ACQTM  
PD  
PWI  
IRNUC  
CTEMP  
SLVNT  
EXREF  
BF  
RGAIN

24-02-2010 01:06:60

13C  
shie pulse dec  
150.92 MHz  
8.52 KHz  
1.74 Hz  
32768  
47348.48 Hz  
117  
0.6921 sec  
2.0000 sec  
2.87 usec  
1H  
196 c  
CDCL3  
77.00 ppm  
1.20 Hz  
60

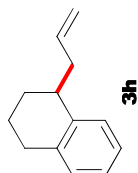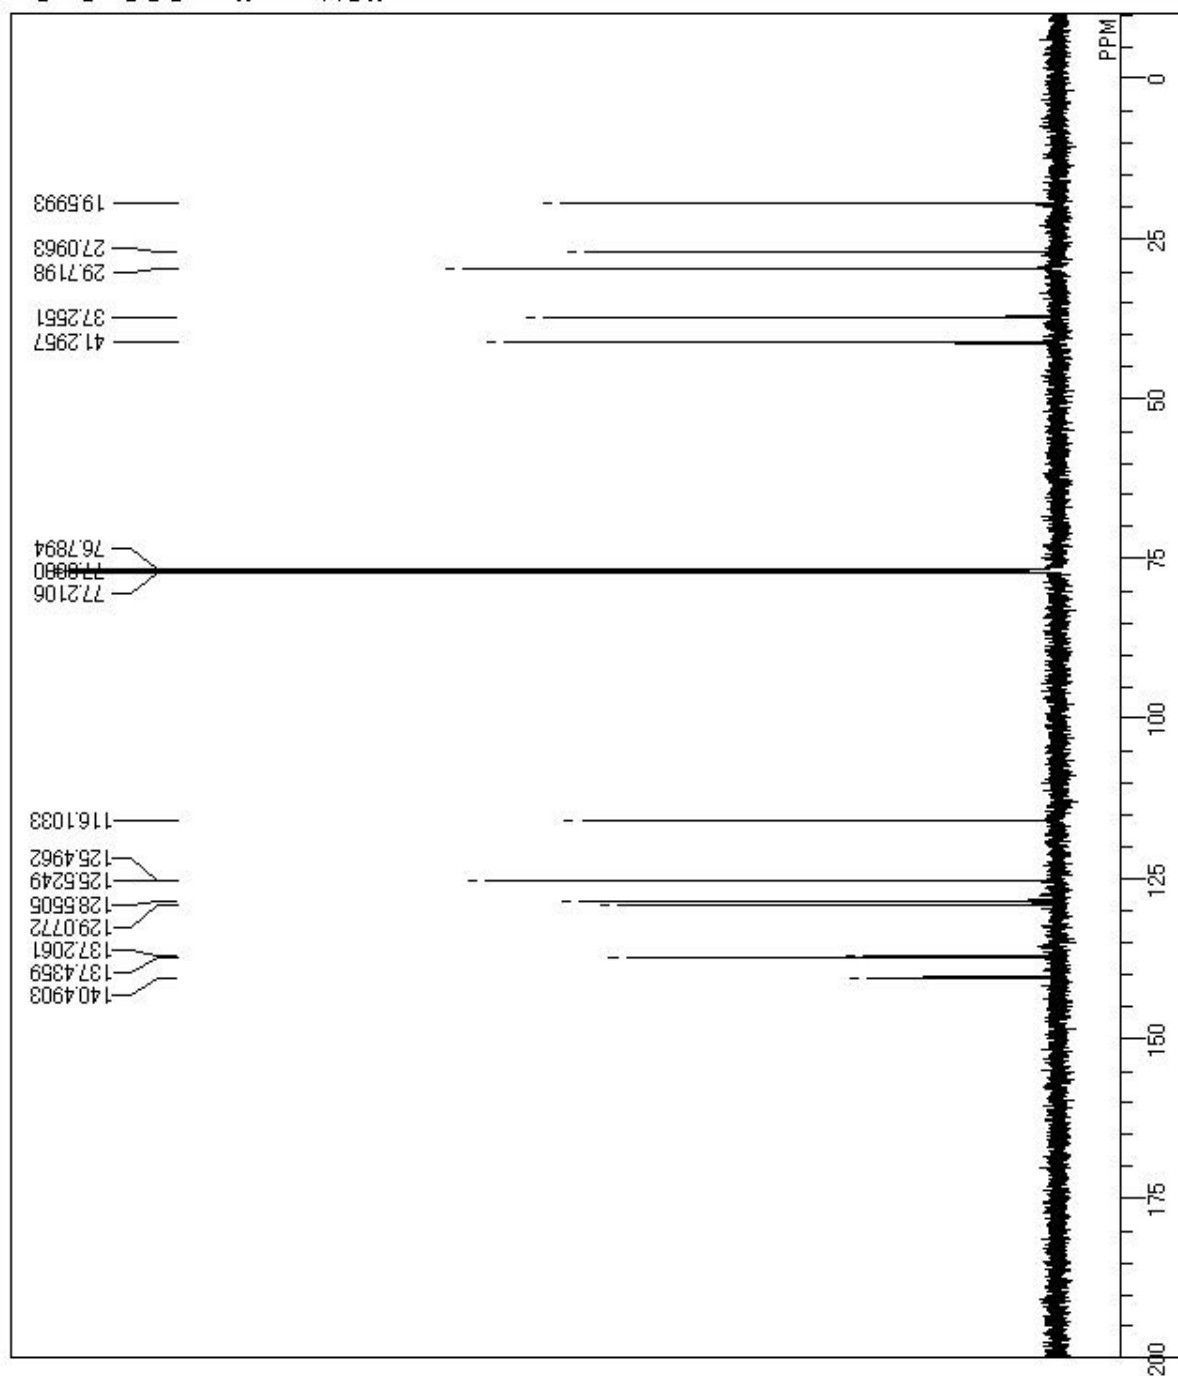

C:\Documents and Settings\delta\My I

single pulse  
07-06-2010 21:31:34

1H  
single\_pulse.ex2

600.17 MHz  
5.30 KHz

5.47 Hz  
16384

11261.26 Hz  
8

1.4549 sec  
2.0000 sec

6.50 usec  
1H

22.4 c  
CDCL3

0.00 ppm  
0.12 Hz

36  
RGAIN

DFILE  
COMNT  
DATIM  
OBNUC  
EXMOD  
OBFRQ  
OBSET  
OBFIN  
POINT  
FREQU  
SCANS  
ACQTM  
P.D  
P.W1  
IRNUC  
CTEMP  
SLVNT  
EXREF  
BF  
RGAIN

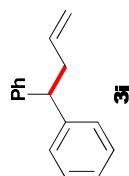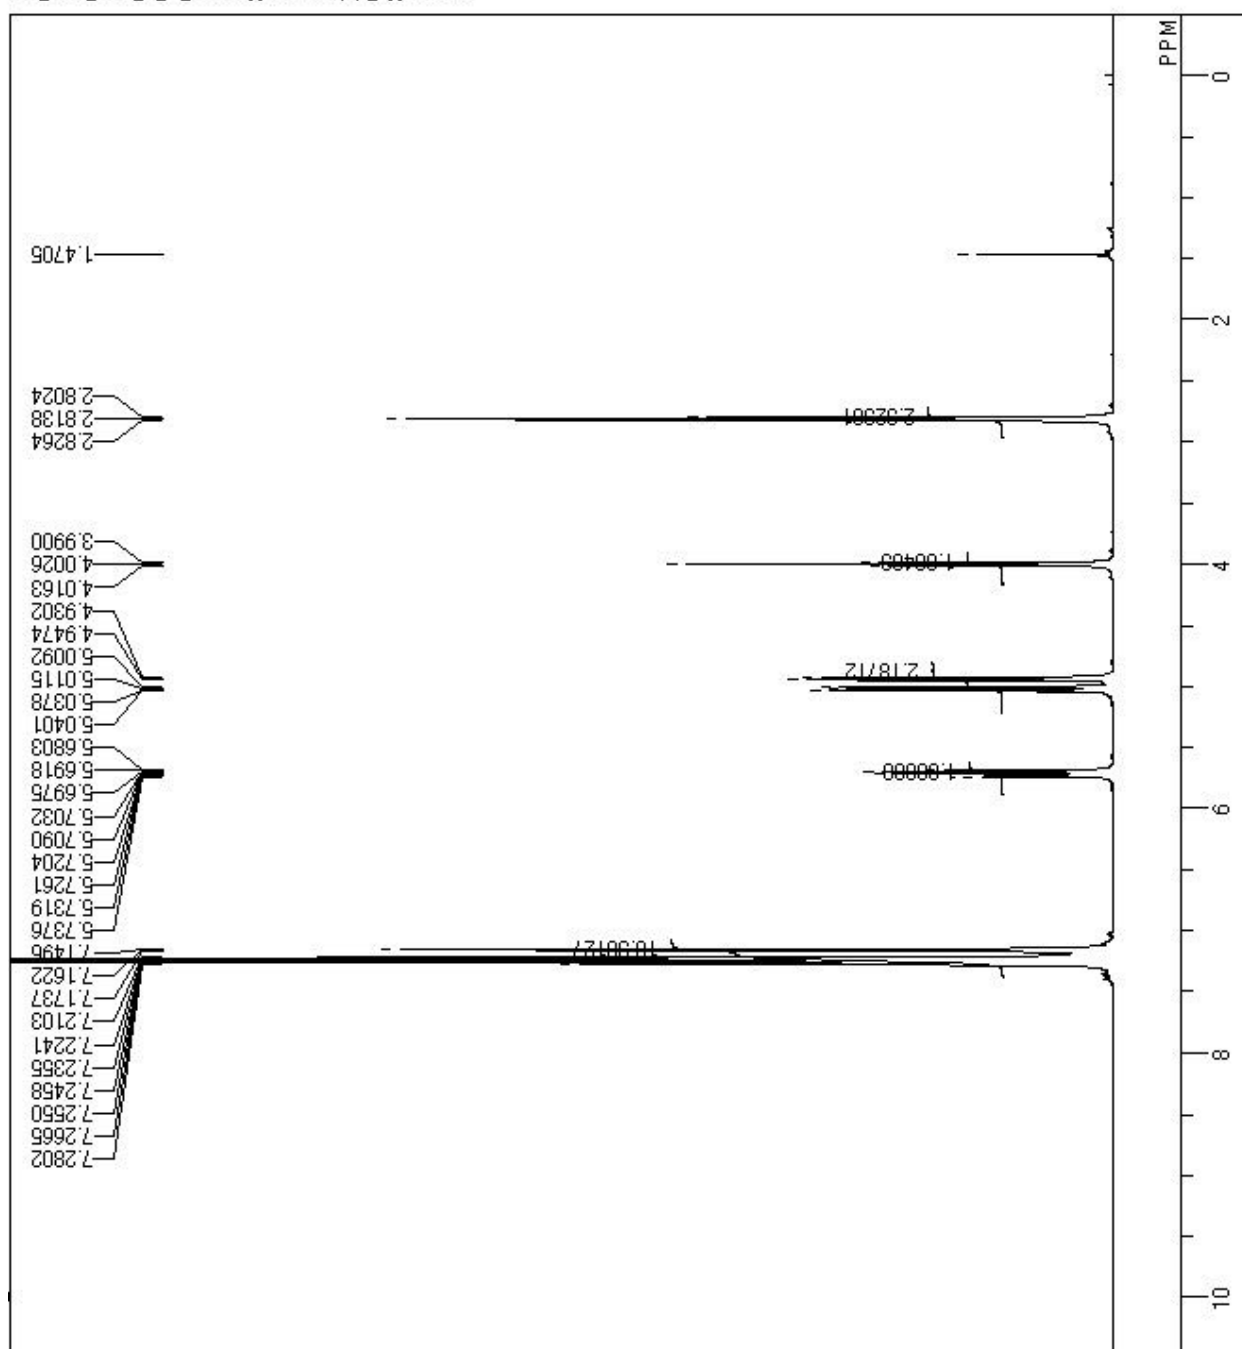

C:\Documents and Settings\delta\My I

DFILE  
COMNT  
DATIM  
OBNUC  
EXMOD  
OBFRQ  
OBSET  
OBFIN  
POINT  
FREQU  
SCANS  
ACQTM  
PD  
PW1  
IRNUC  
CTEMP  
SLVNT  
EXREF  
BF  
RGAIN

07-06-2010 21:36:19

13C  
single pulse dec  
150.92 MHz  
8.52 KHz  
1.74 Hz  
32768  
47348.48 Hz  
50  
0.6921 sec  
2.0000 sec  
2.87 usec  
1H  
23.1 c  
CDCL3  
77.00 ppm  
0.12 Hz  
60

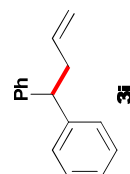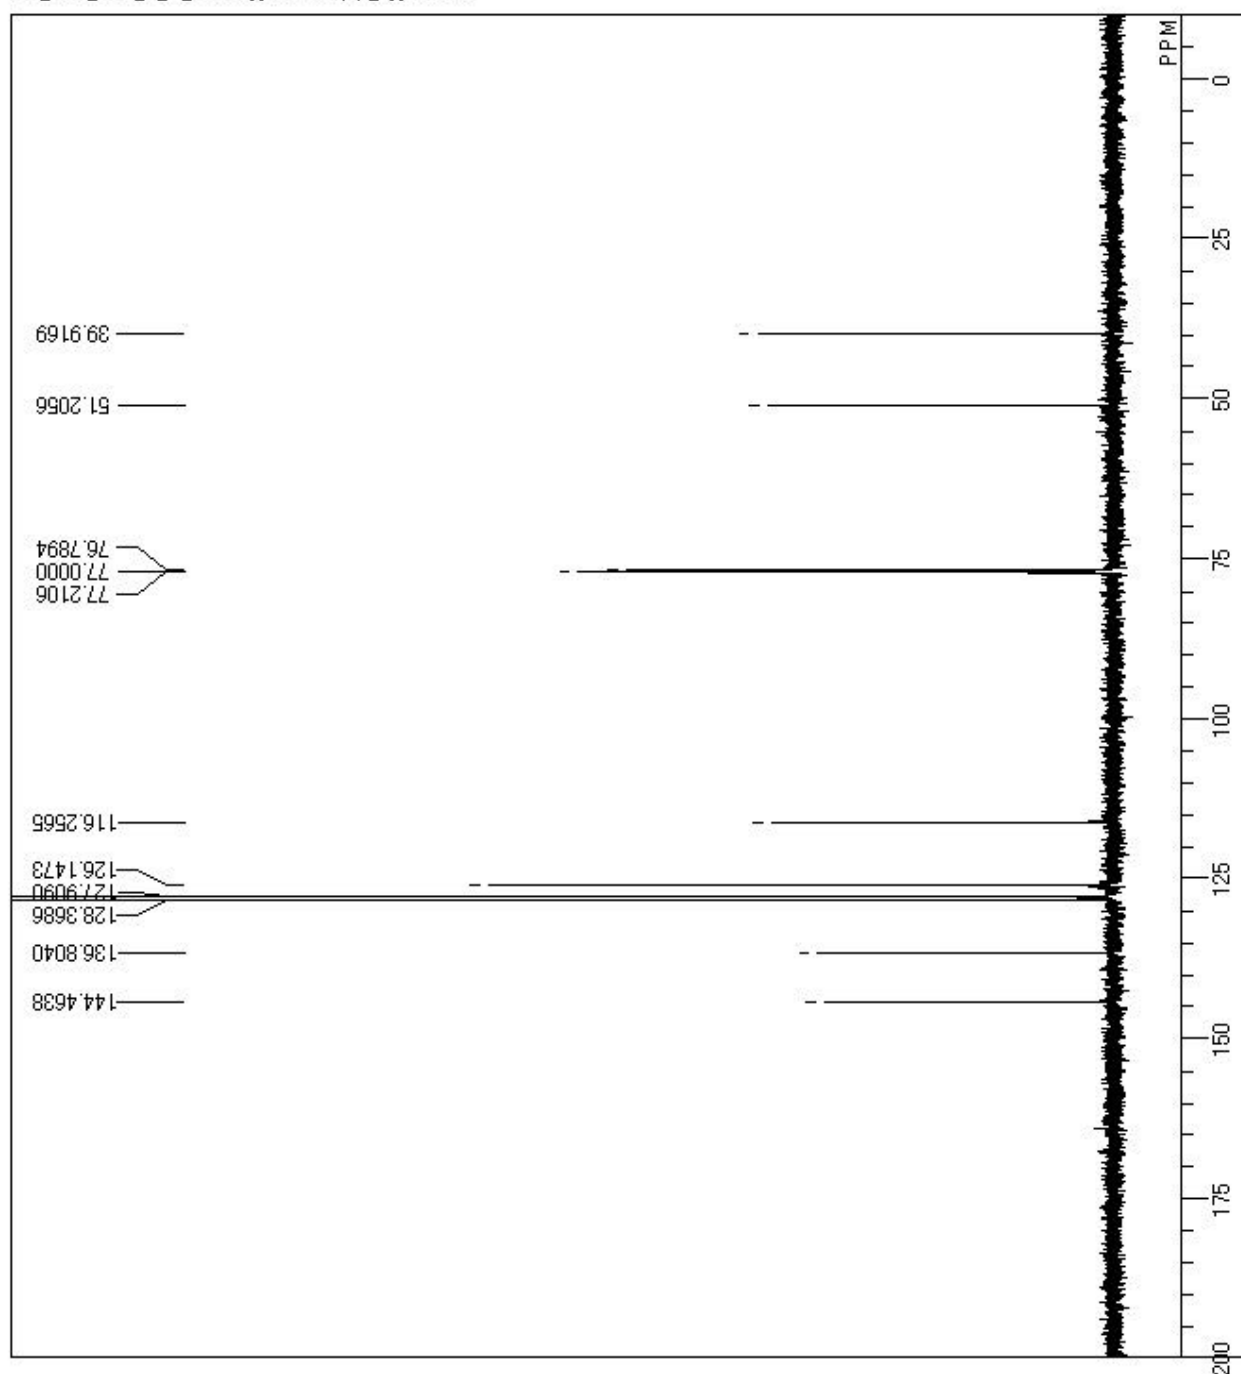



C:\Documents and Settings\My [

DFILE  
COMNT  
DATIM  
OBNUC  
EXMOD  
OBFREQ  
OBSET  
OBFIN  
POINT  
FREQU  
SCANS  
ACQTM  
PW1  
IRNUC  
CTEMP  
SLVNT  
EXREF  
BF  
RGAIN

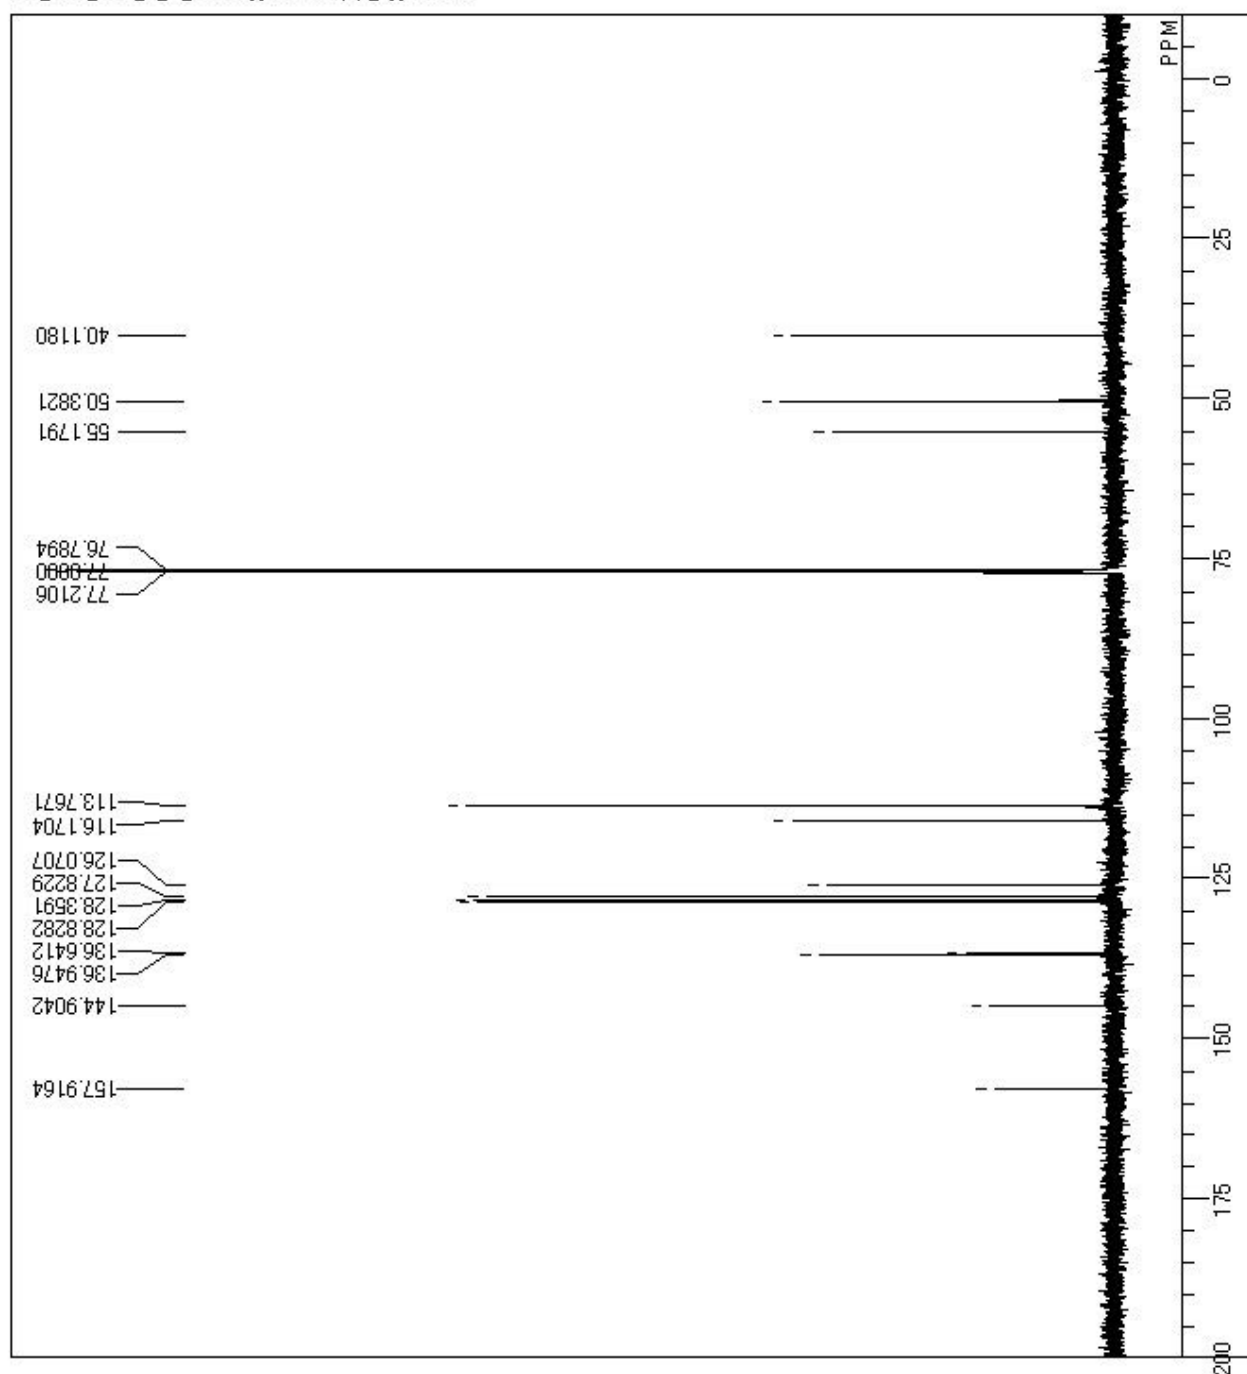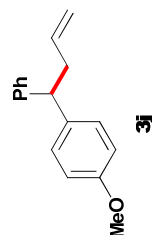

C:\Documents and Settings\delta\My I  
 single\_pulse  
 07-06-2010 22:04:29  
 1H  
 single\_pulse.ex2  
 600.17 MHz  
 5.30 KHz  
 5.47 Hz  
 16384  
 11261.26 Hz  
 8  
 1.4549 sec  
 2.0000 sec  
 6.50 usec  
 1H  
 22.7 c  
 CDCL<sub>3</sub>  
 0.00 ppm  
 0.12 Hz  
 42  
 RGAIN

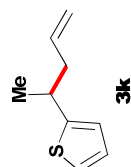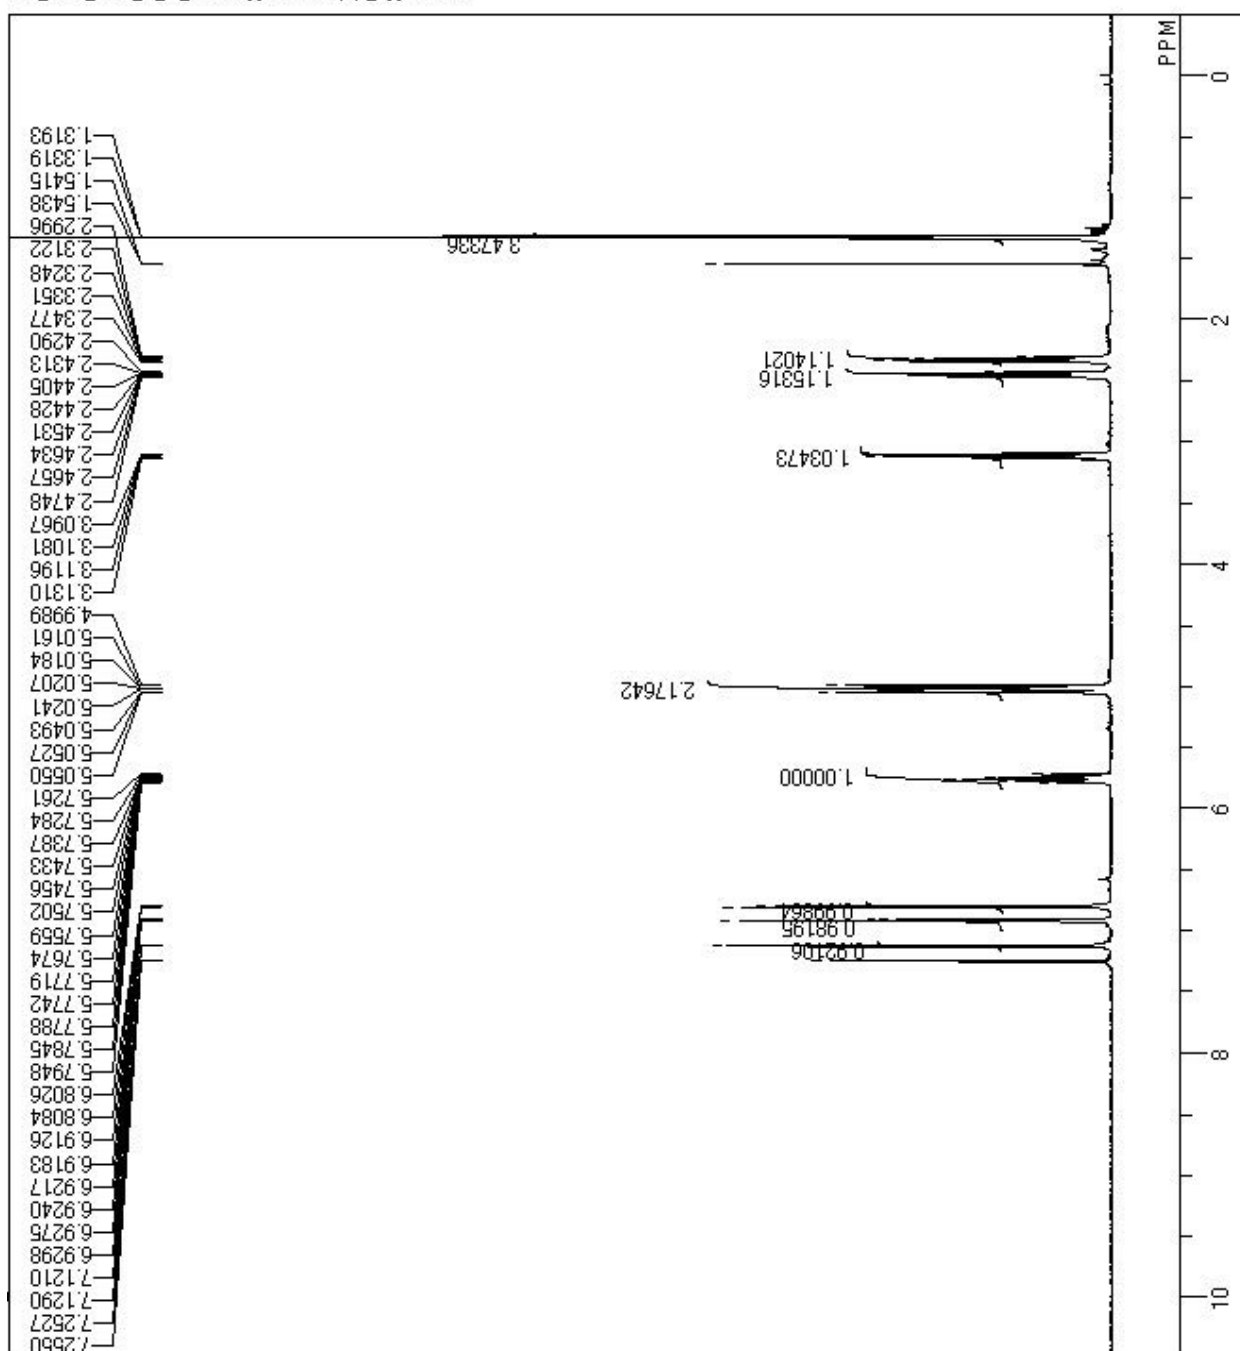

DFILE  
COMNT  
DATIM  
OBNUC  
EXMOD  
OBFRQ  
OBSET  
OBFIN  
POINT  
FREQU  
SCANS  
ACQTM  
P.D  
PWI  
IRNUC  
CTEMP  
SLVNT  
EXREF  
BF  
RGAIN

07-06-2010 22:10:53  
13C  
single\_pulse\_dec  
150.92 MHz  
8.52 KHz  
1.74 Hz  
32768  
47348.48 Hz  
86  
0.6921 sec  
2.0000 sec  
2.87 usec  
1H  
23.5 c  
CDCL3  
77.00 ppm  
0.12 Hz  
60

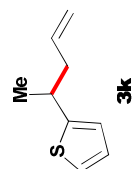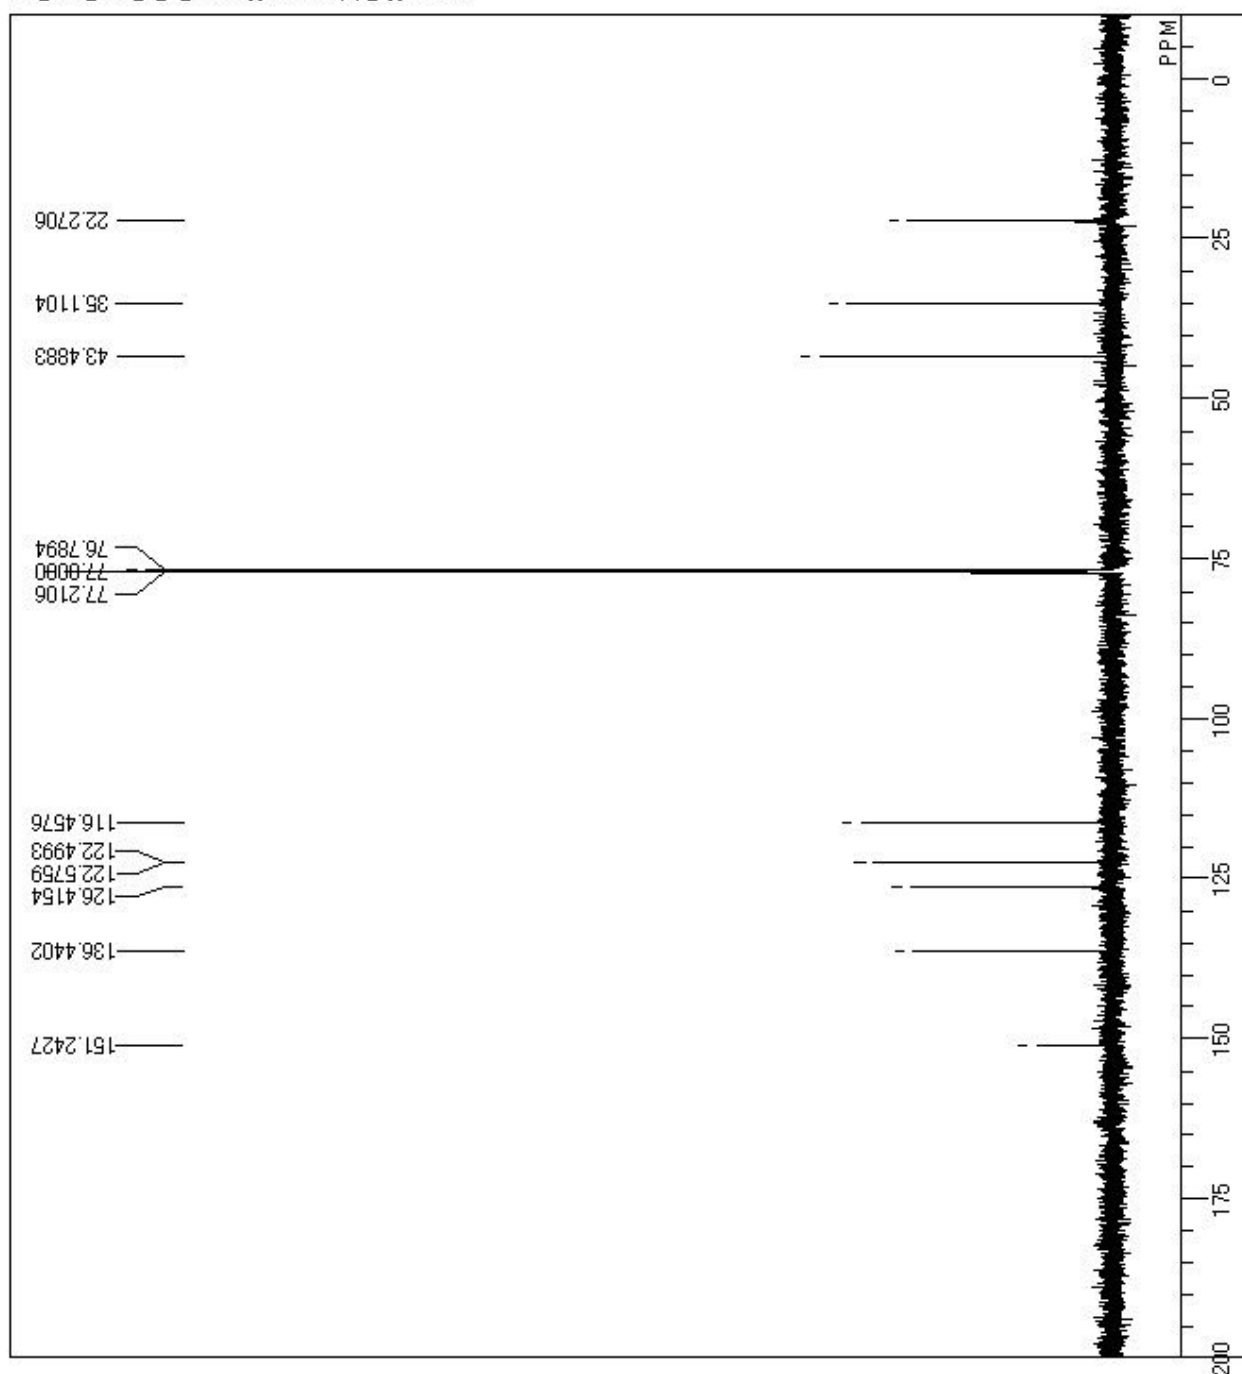

C:\Documents and Settings\delta\My I

DFILE  
COMNT  
DATIM  
OBNUC  
EXMOD  
OBFRQ  
OBSET  
OBFIN  
POINT  
FREQU  
SCANS  
ACQTM  
PWI  
IRNUC  
CTEMP  
SLVNT  
EXREF  
BF  
RGAIN

22-06-2010 16:23:39

1H

single pulse ex2

399.78 MHz

4.19 KHz

7.29 Hz

16384

7503.00 Hz

8

2.1837 sec

2.0000 sec

6.50 usec

1H

406.5 c

CDCL3

0.00 ppm

1.20 Hz

34

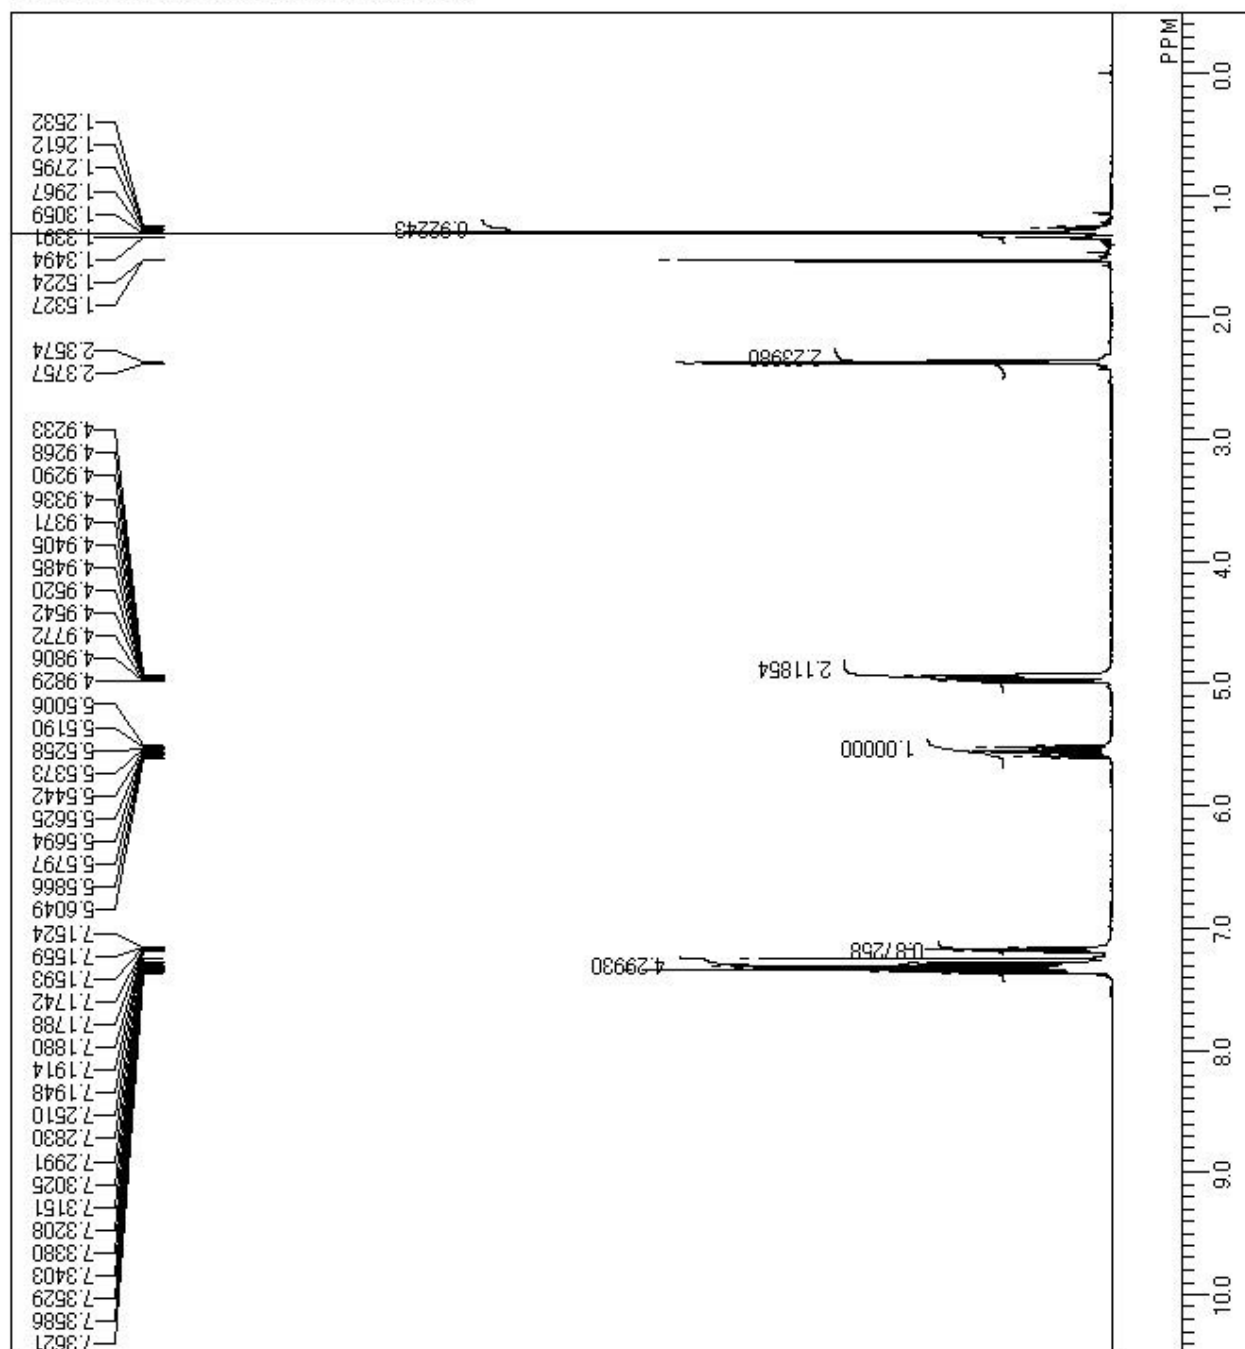

C:\Documents and Settings\delta\My I

DFILE  
 COMNT  
 DATIM  
 OBNUC  
 EXMOD  
 OBFRQ  
 OBSET  
 OBFIN  
 POINT  
 FREQU  
 SCANS  
 ACQTM  
 PD  
 PW1  
 IRNUC  
 CTEMP  
 SLVNT  
 EXREF  
 BF  
 RGAIN

22-06-2010 16:30:10

13C  
single pulse dec

100.53 MHz

5.35 KHz

5.86 Hz

32768

31407.04 Hz

62

1.0433 sec

2.0000 sec

3.50 usec

1H

406.5 c

CDCL3

77.00 ppm

1.20 Hz

56

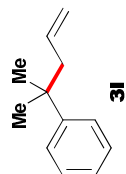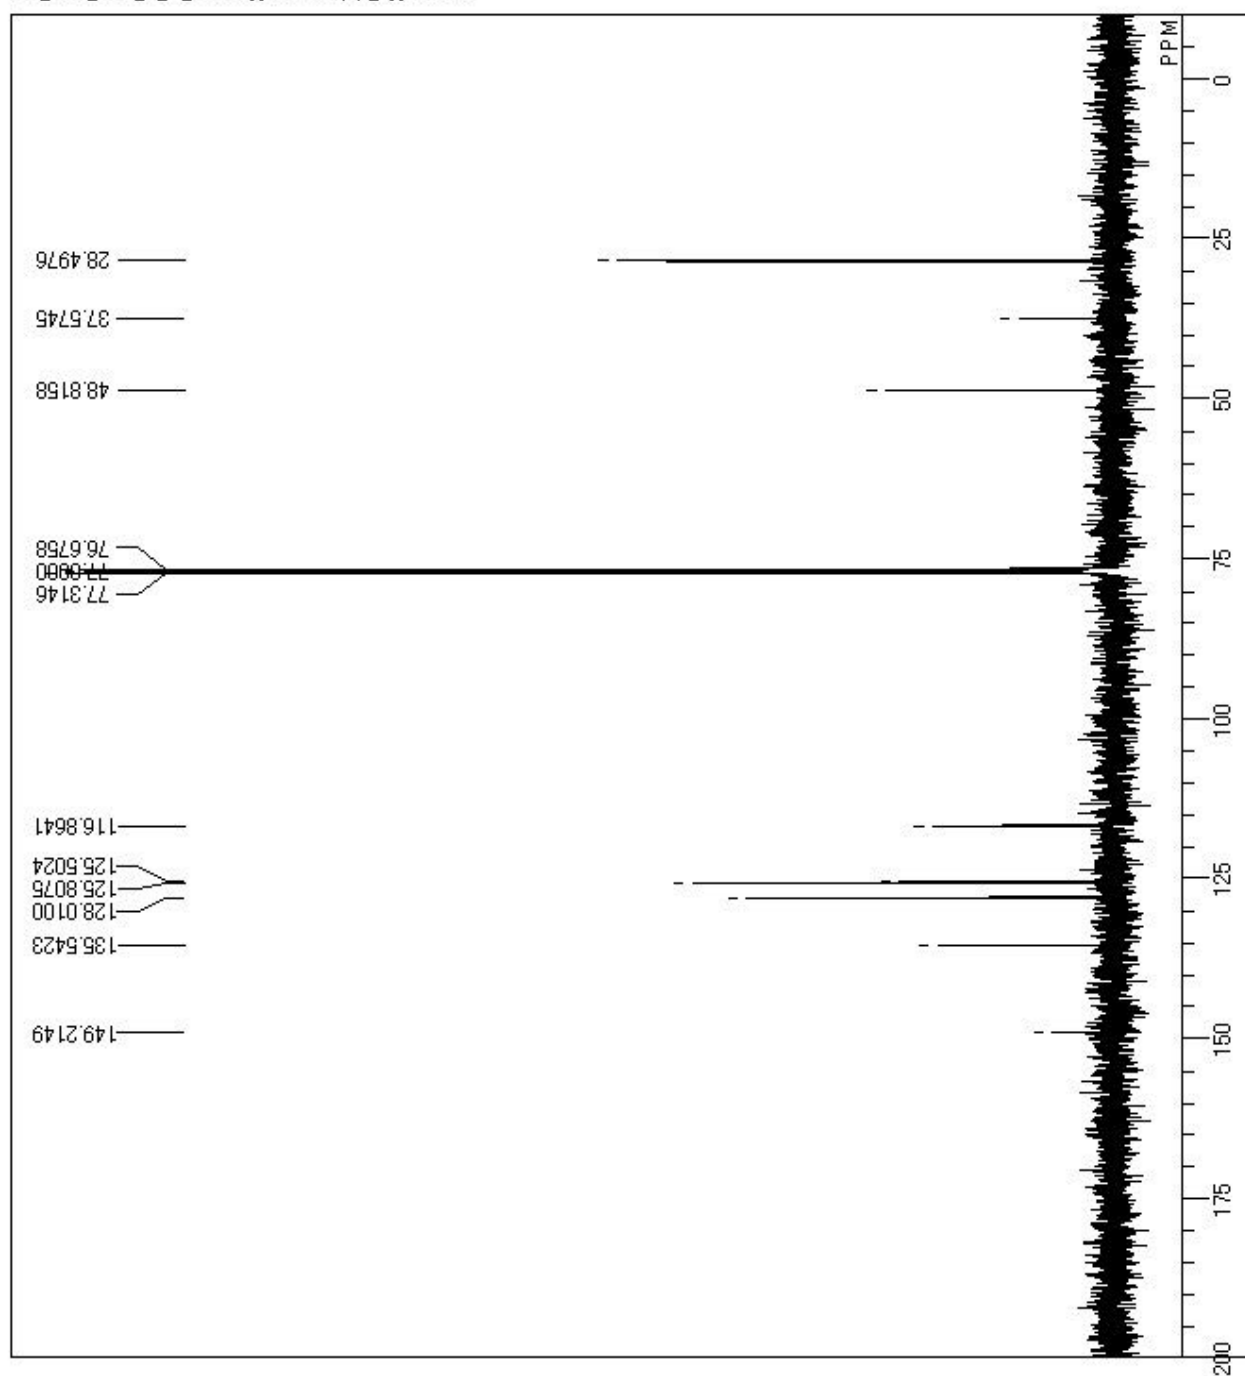

S-36

C:\Documents and Settings\delta\My I

single pulse  
25-05-2010 01:19:15

1H  
single\_pulse.ex2  
600.17 MHz

5.30 KHz  
5.47 Hz  
16384

11261.26 Hz  
8

1.4549 sec  
2.0000 sec  
6.50 usec

1H  
21.3 c  
CDCL3

0.00 ppm  
0.20 Hz  
38

DFILE  
COMNT  
DATIM  
OBNUC  
EXMOD  
OBFRQ  
OBSET  
OBFIN  
POINT  
FREQU  
SCANS  
ACQTM  
P.D  
PWI  
IRNUC  
CTEMP  
SLVNT  
EXREF  
BF  
RGAIN

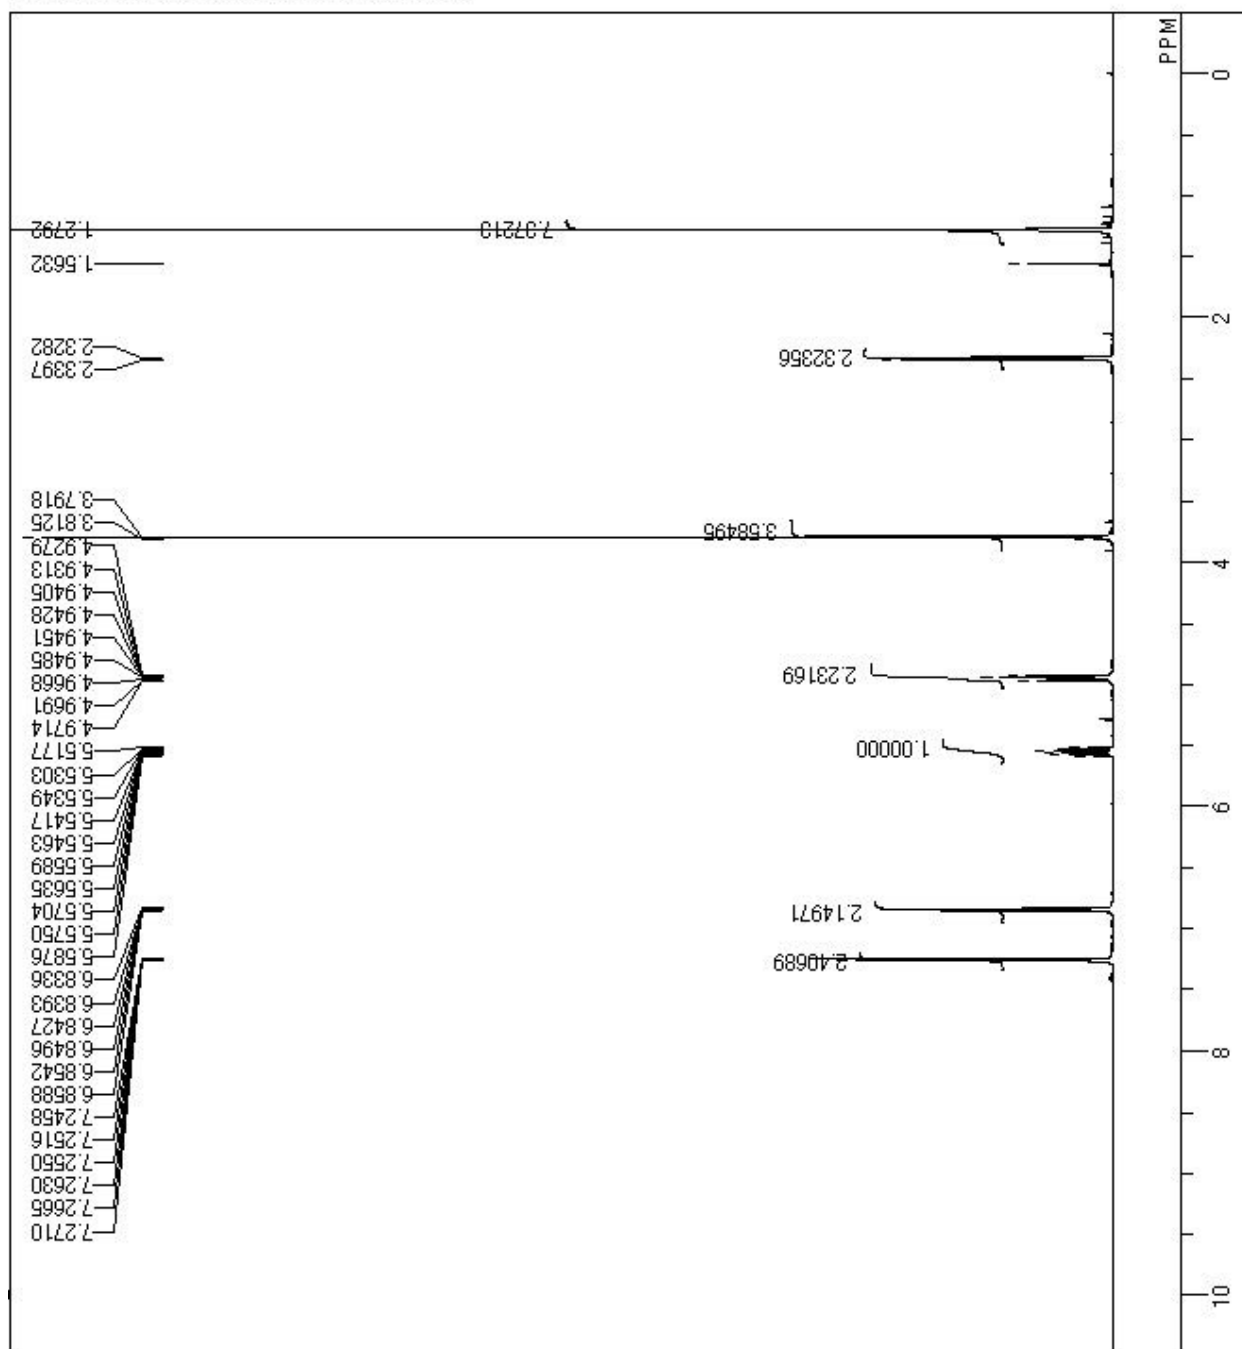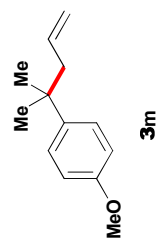

C:\Documents and Settings\delta\My I

DFILE  
COMNT  
DATIM  
OBNUC  
EXMOD  
OBFRQ  
OBSET  
OBFIN  
POINT  
FREQU  
SCANS  
ACQTM  
PWI  
IRNUC  
CTEMP  
SLVNT  
EXREF  
BF  
RGAIN

25-05-2010 01:25:02  
13C  
single pulse dec  
150.92 MHz  
8.52 KHz  
1.74 Hz  
32768  
47348.48 Hz  
60  
0.6921 sec  
2.0000 sec  
2.87 usec  
1H  
22.0 c  
CDCl3  
77.00 ppm  
0.20 Hz  
60

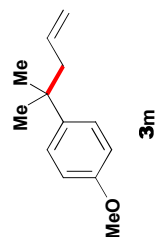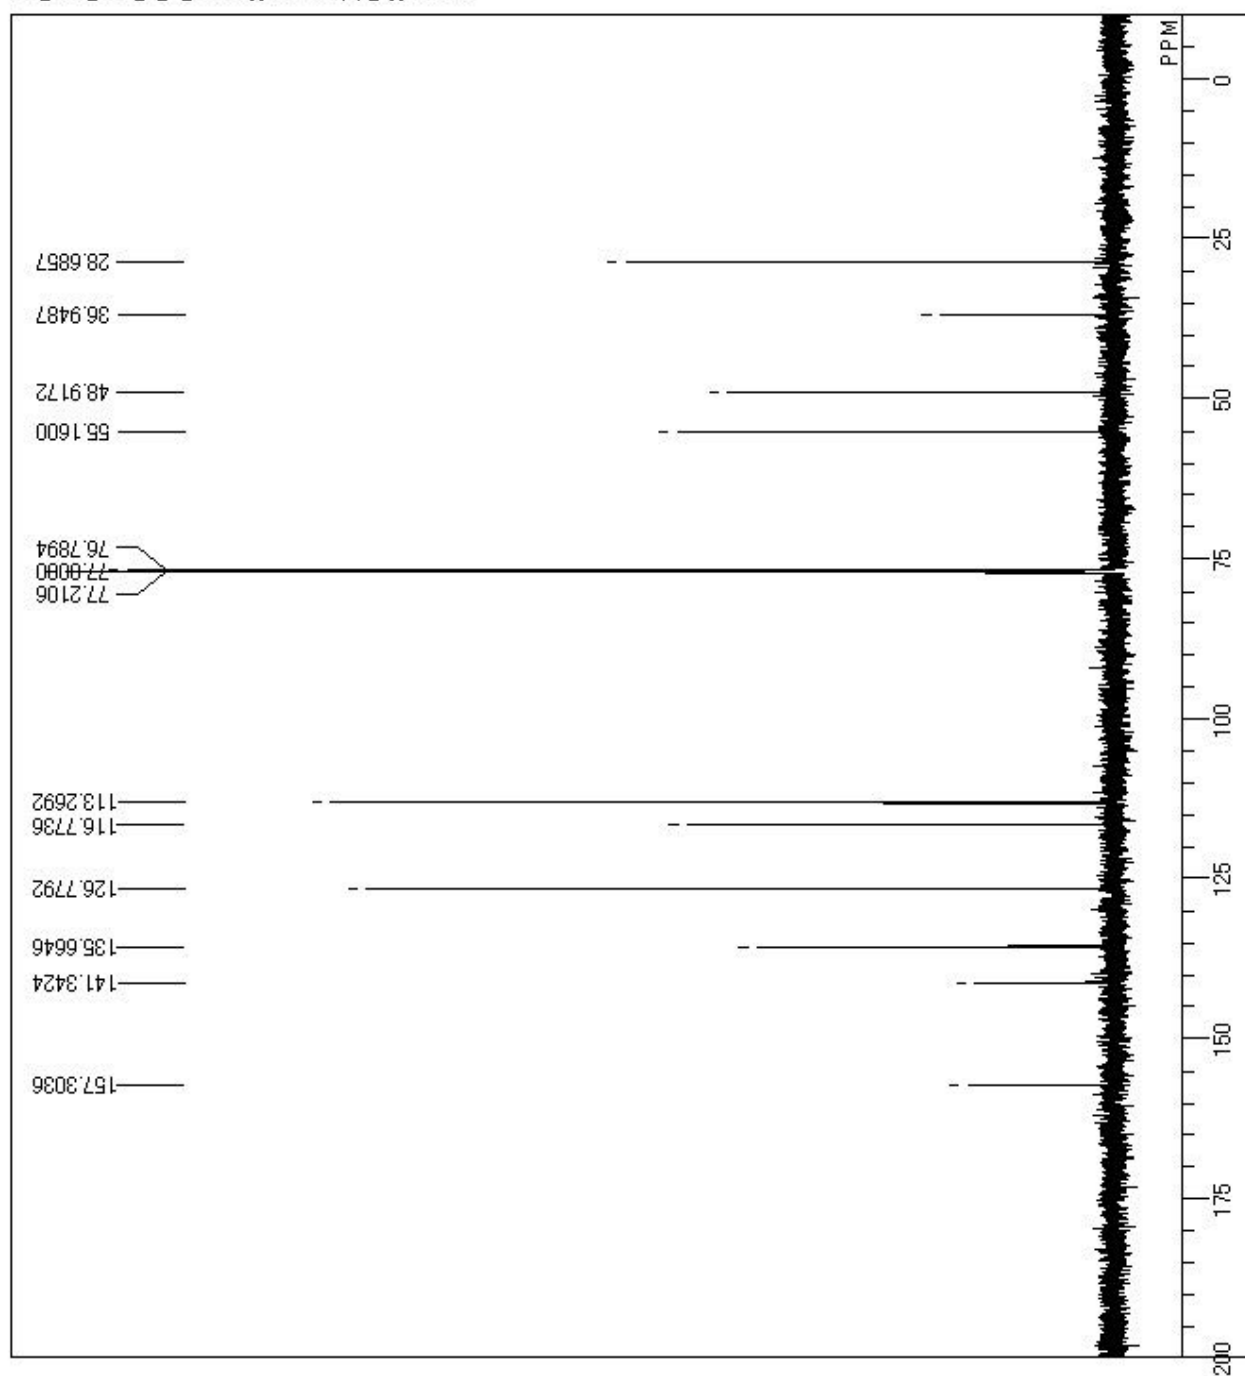

C:\Documents and Settings\delta\My I

DFILE  
COMNT  
DATIM  
OBNUC  
EXMOD  
OBFREQ  
OBSET  
OBFIN  
POINT  
FREQU  
SCANS  
ACQTM  
PD  
PWI  
IRNUC  
CTEMP  
SLVNT  
EXREF  
BF  
RGAIN

single\_pulse  
07-06-2010 21:40:47  
1H  
single\_pulse.ex2  
600.17 MHz  
5.30 KHz  
5.47 Hz  
16384  
11261.26 Hz  
8  
1.4549 sec  
2.0000 sec  
6.50 usec  
1H  
22.6 c  
CDCL3  
0.00 ppm  
0.12 Hz  
32

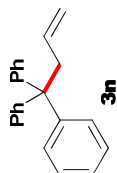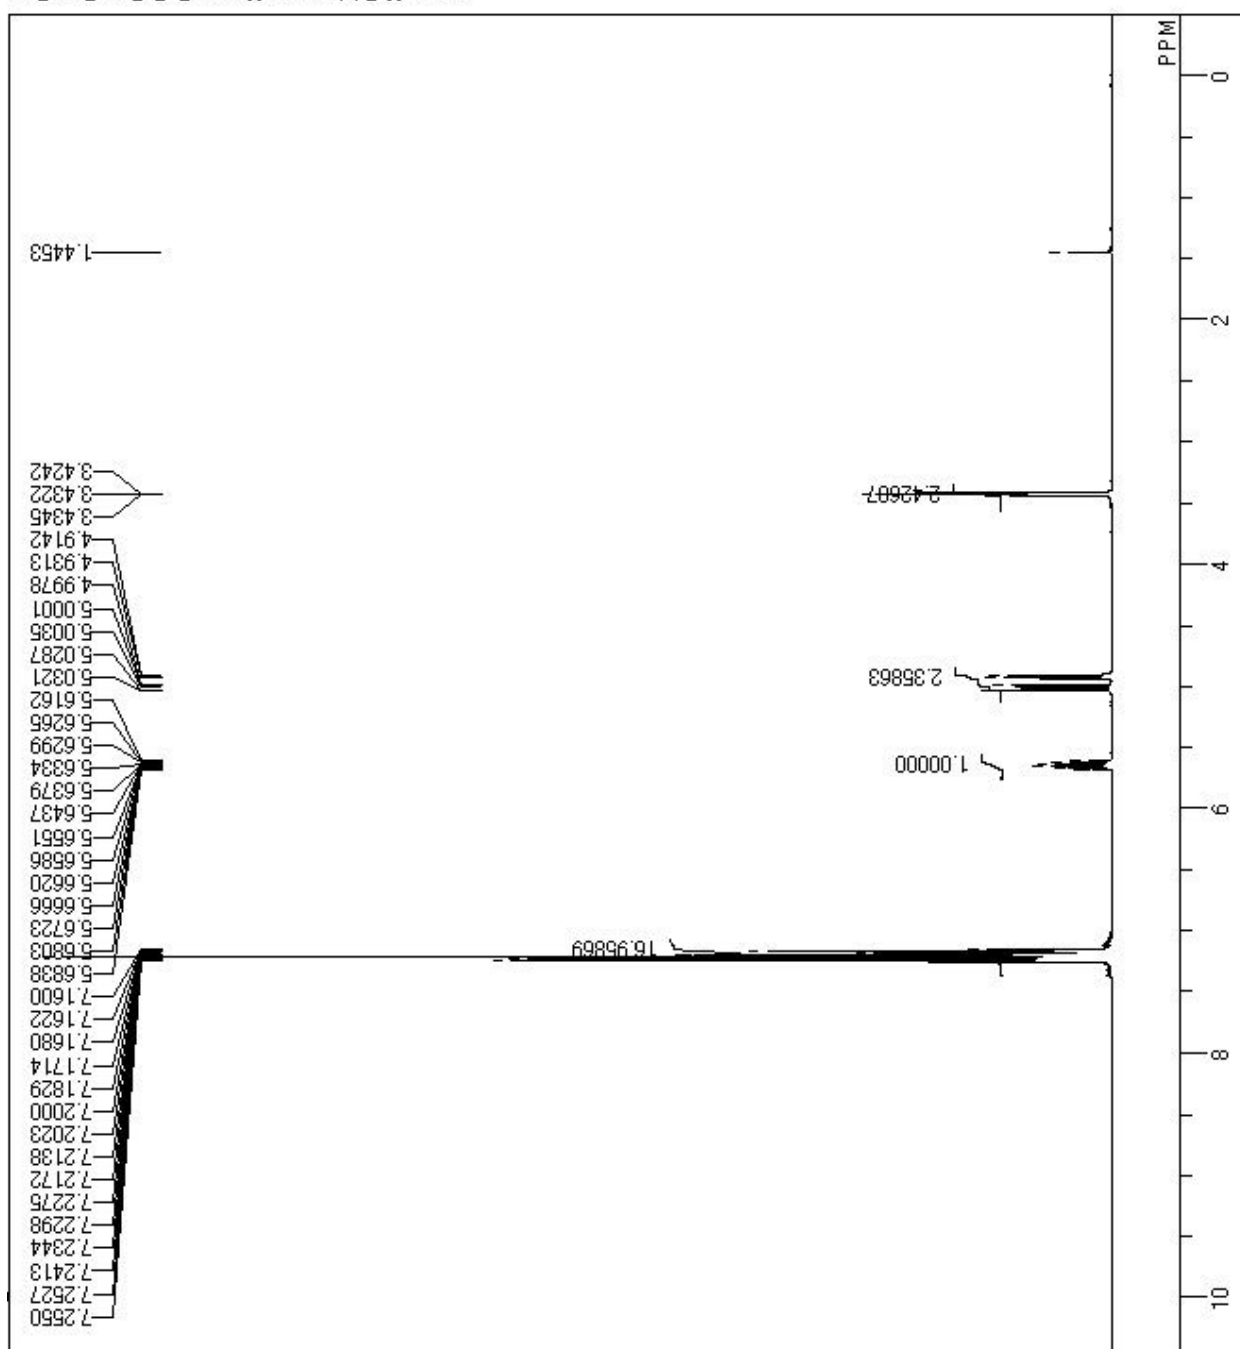

DFILE  
COMNT  
DATIM  
OBNUG  
EXMOD  
OBFRO  
OBSET  
OBFIN  
POINT  
FREQU  
SCANS  
ACQTM  
PD  
PW1  
IRNUG  
CTEMP  
SLVNT  
EXREF  
BF  
RGAIN

DFILE  
COMNT  
DATIM  
OBNUG  
EXMOD  
OBFRO  
OBSET  
OBFIN  
POINT  
FREQU  
SCANS  
ACQTM  
PD  
PW1  
IRNUG  
CTEMP  
SLVNT  
EXREF  
BF  
RGAIN

C:\Documents and Se  
07-06-2010 21:45:28

13C  
07 00 2010 21:40

single\_pulse\_dec

150.92 MHz

8.52 KHz

1.74 Hz  
0072032768  
17040 40 11-47348.48 Hz  
5.1

0.6921 sec  
54 pg

0.6921 sec  
2.0000 sec2.0000 sec  
2.87  $\mu$ sec1H  
2.07 usec

23.4 c

CDCL3

77.00 ppm

0.12 Hz

09

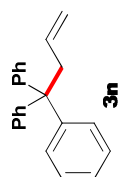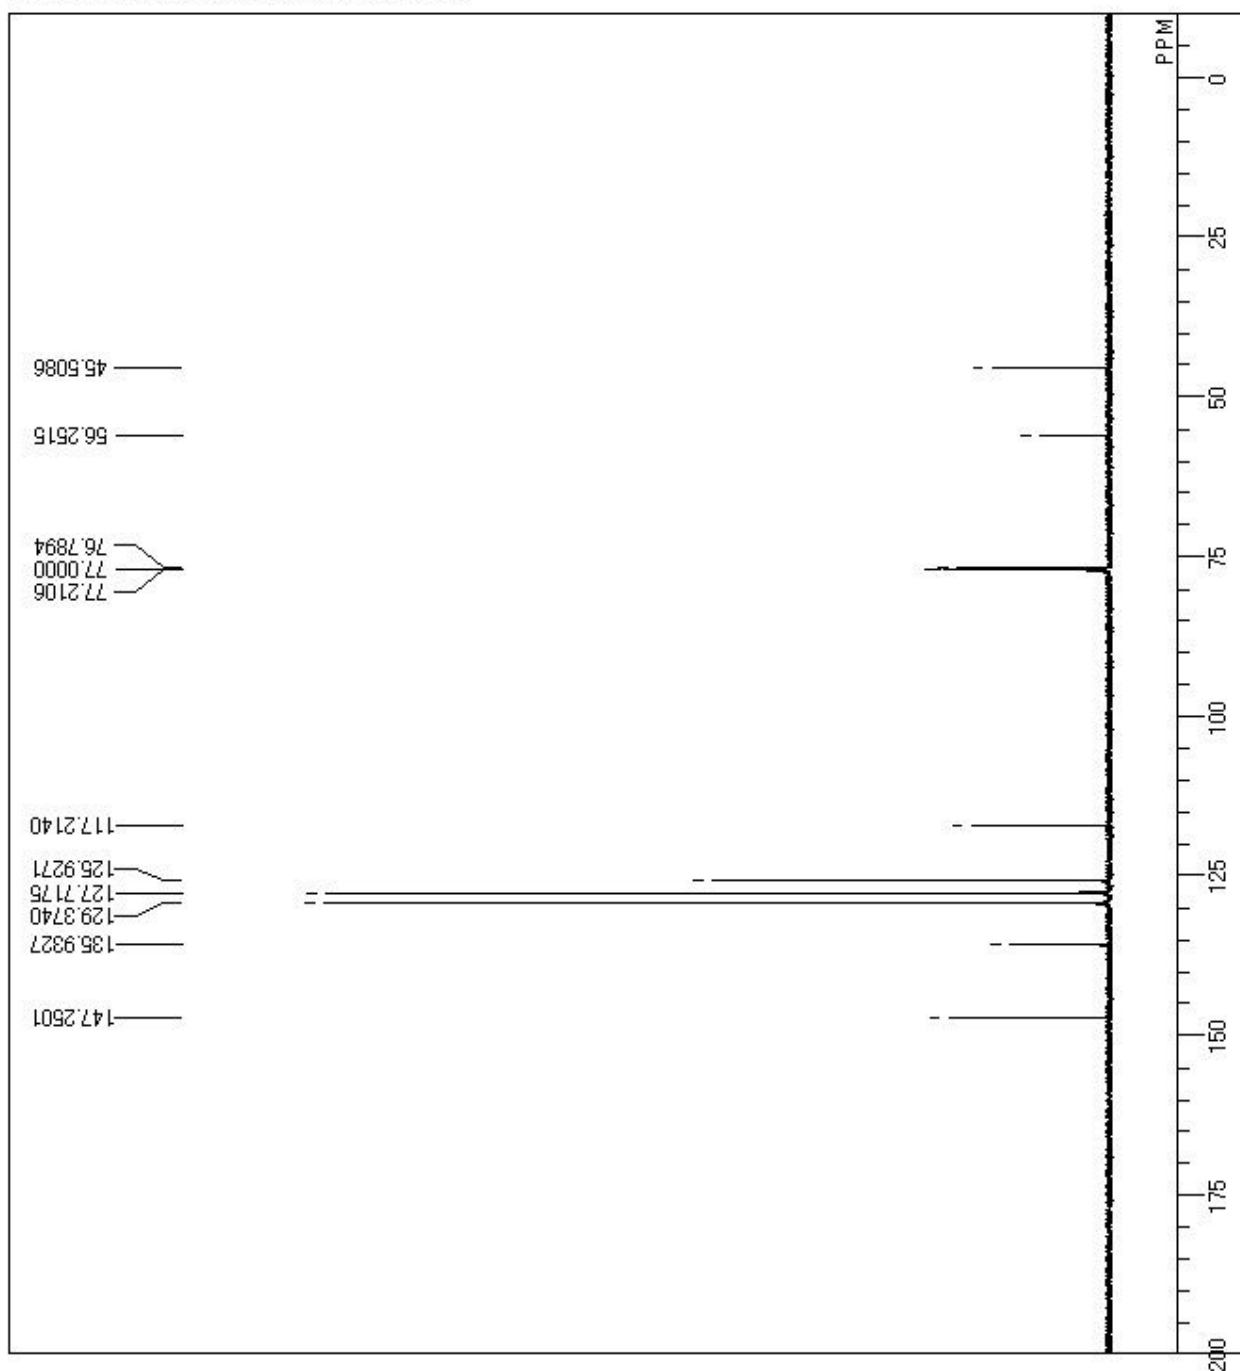

S-40

[illegible]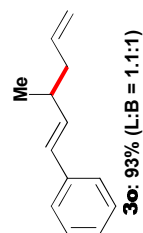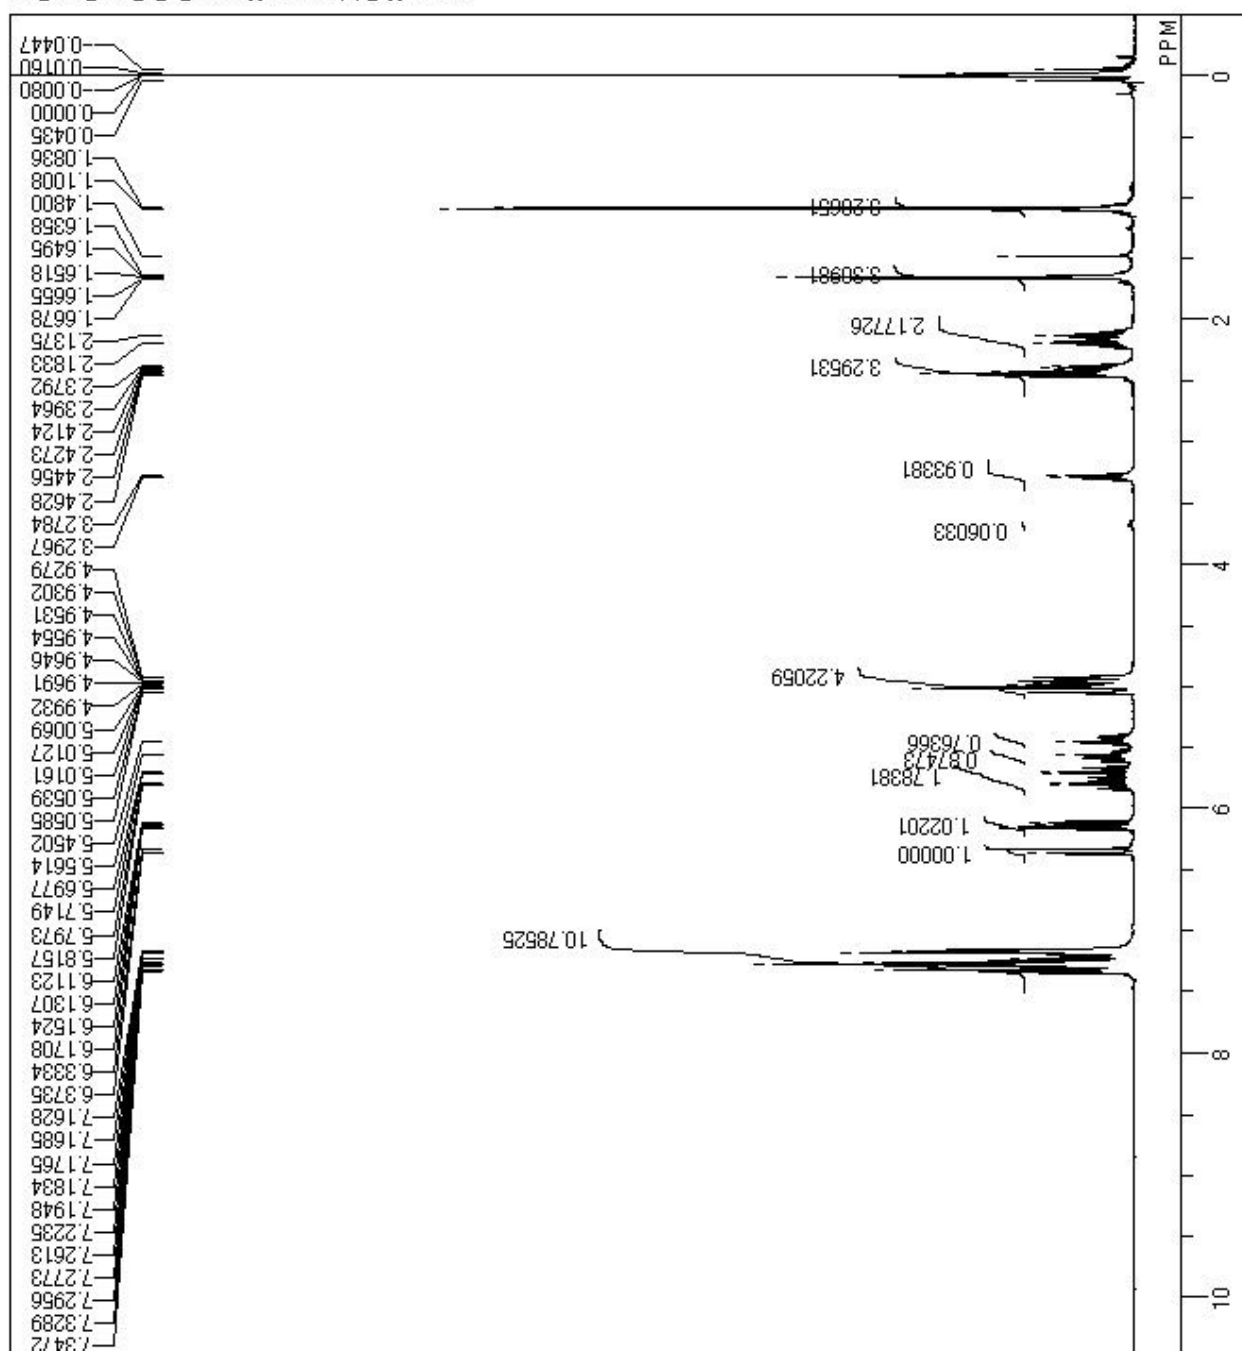

C:\Documents and Settings\delta\delta\delta\delta\delta\delta\delta

DFILE  
 COMNT  
 DATIM  
 OBNUC  
 EXMOD  
 OBFREQ  
 OBSET  
 OBFIN  
 POINT  
 FREQU  
 SCANS  
 ACQTM  
 PD  
 PWI  
 TRNUC  
 CTEMP  
 SLVNT  
 EXREF  
 BF  
 RGAIN

20-08-2010 19:41:60

single pulse dec  
100.53 MHz

5.35 KHz  
5.86 Hz

40961  
39259.39 Hz

98  
1.0433 sec

2.0000 sec  
3.50 usec

1H  
409.1 c

CDCL3  
0.00 ppm

0.71 Hz  
56

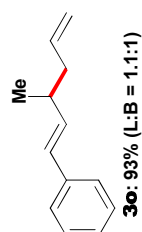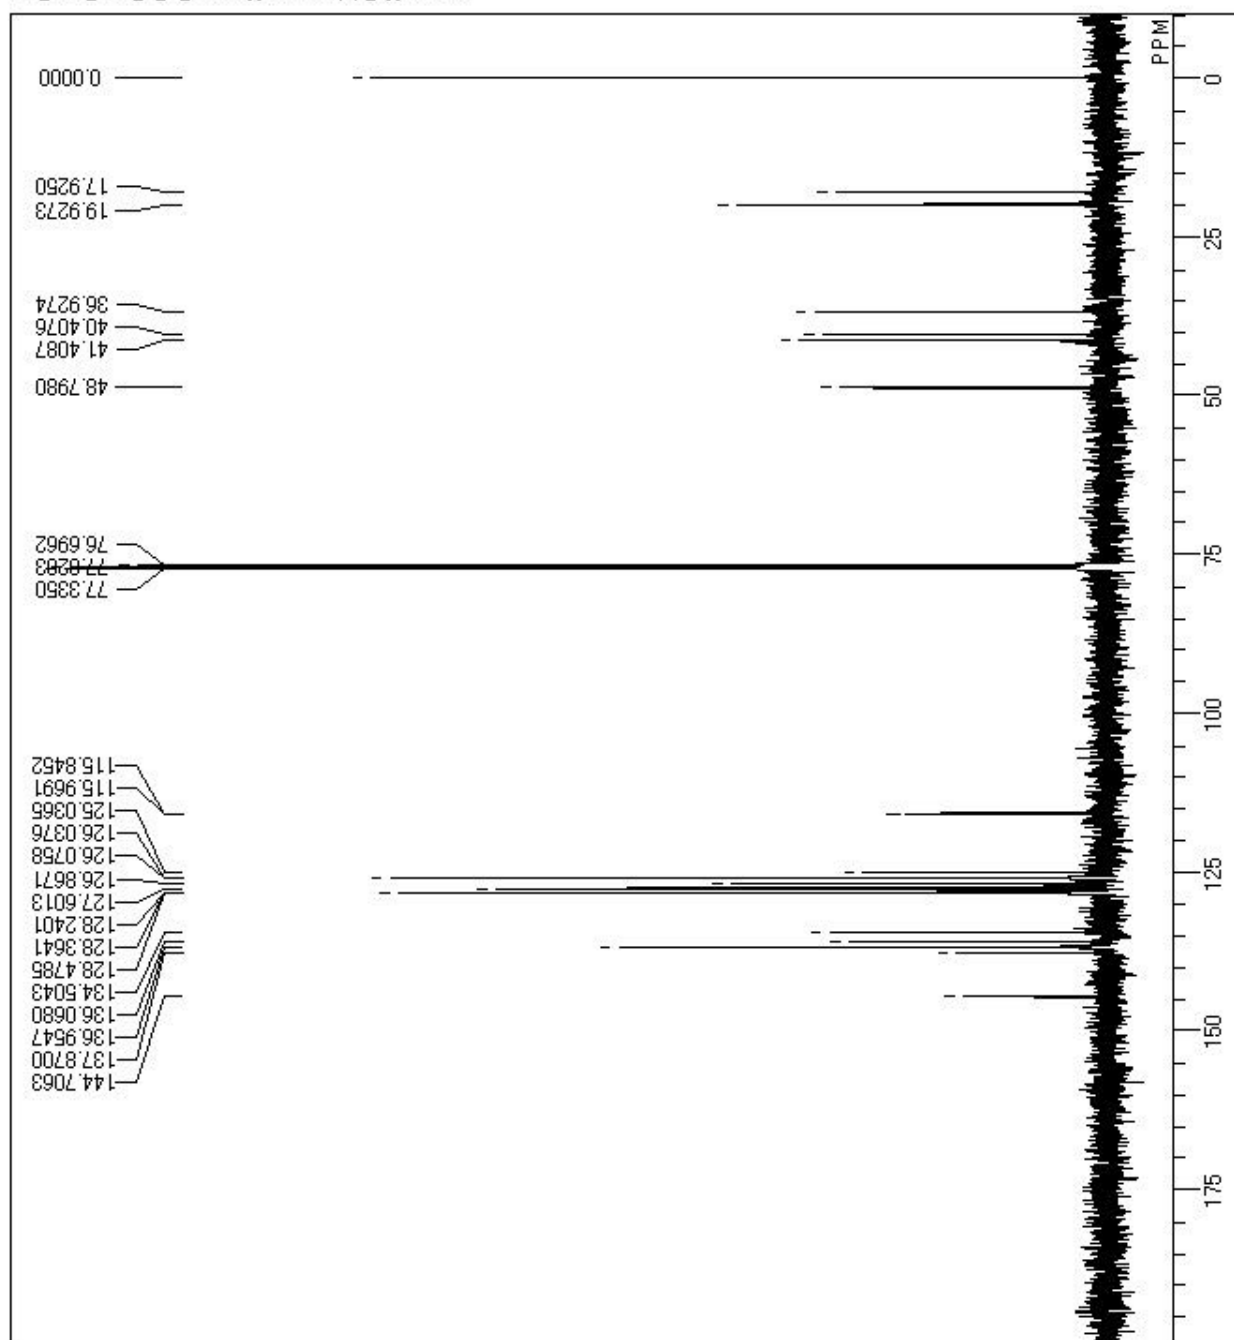

C:\Documents and Settings\delta\My I

single pulse  
11-02-2010 05:21:32

1H

single\_pulse.ex2

600.17 MHz

5.30 KHz

5.47 Hz

13107

9008.87 Hz

8

1.4549 sec

2.0000 sec

6.50 usec

1H

21.4 c

CDCL3

0.00 ppm

1.20 Hz

42

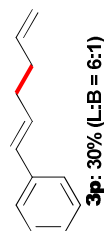

DFILE  
COMNT  
DATIM  
OBNUC  
EXMOD  
OBFRQ  
OBSET  
OBFIN  
POINT  
FREQU  
SCANS  
ACQTM  
PDI  
PWI  
IRNUC  
CTEMP  
SLVNT  
EXREF  
BF  
RGAIN

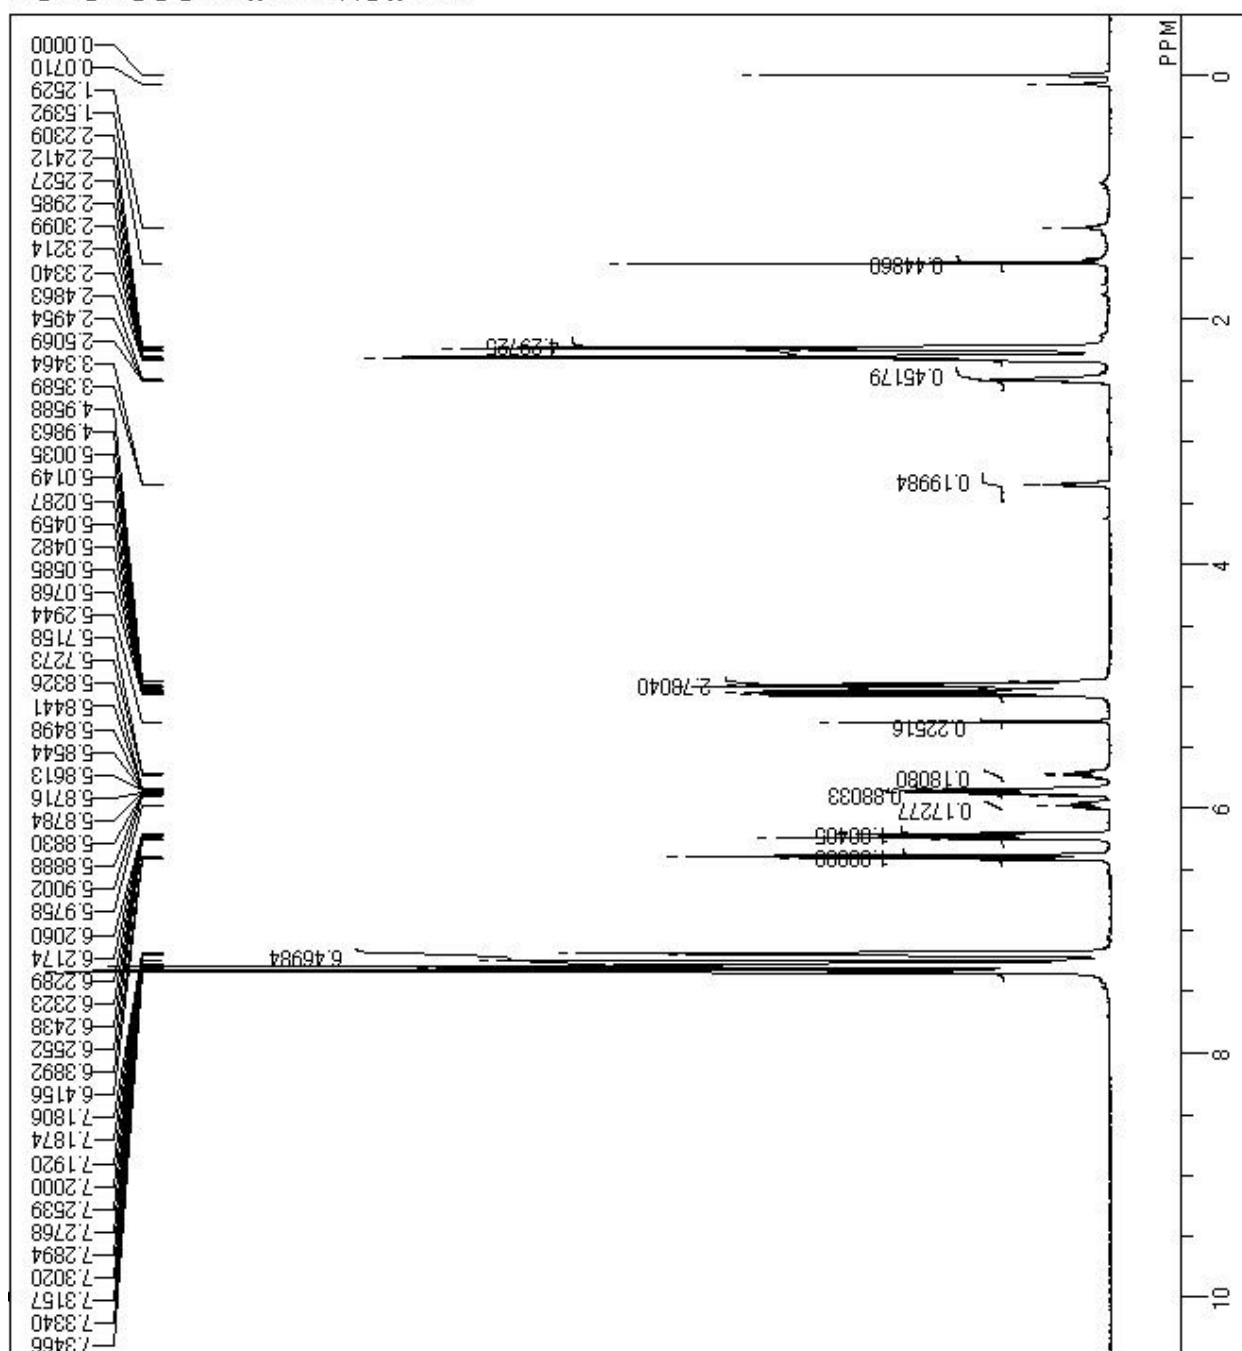

DFILE  
COMNT  
DATIM  
OBNUC  
EXMOD  
OBFRQ  
OBSET  
OBFIN  
POINT  
FREQU  
SCANS  
ACQTM  
PD  
PWI  
IRNUC  
CTEMP  
SLVNT  
EXREF  
BF  
RGAIN

06-02-2010 03:39:19  
13C  
single pulse\_dec  
150.92 MHz  
8.52 KHz  
1.74 Hz  
32768  
47348.49 Hz  
116  
0.6921 sec  
2.0000 sec  
2.87 usec  
1H  
20.0 c  
CDCL3  
77.00 ppm  
0.12 Hz  
58

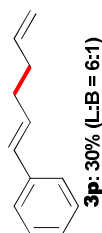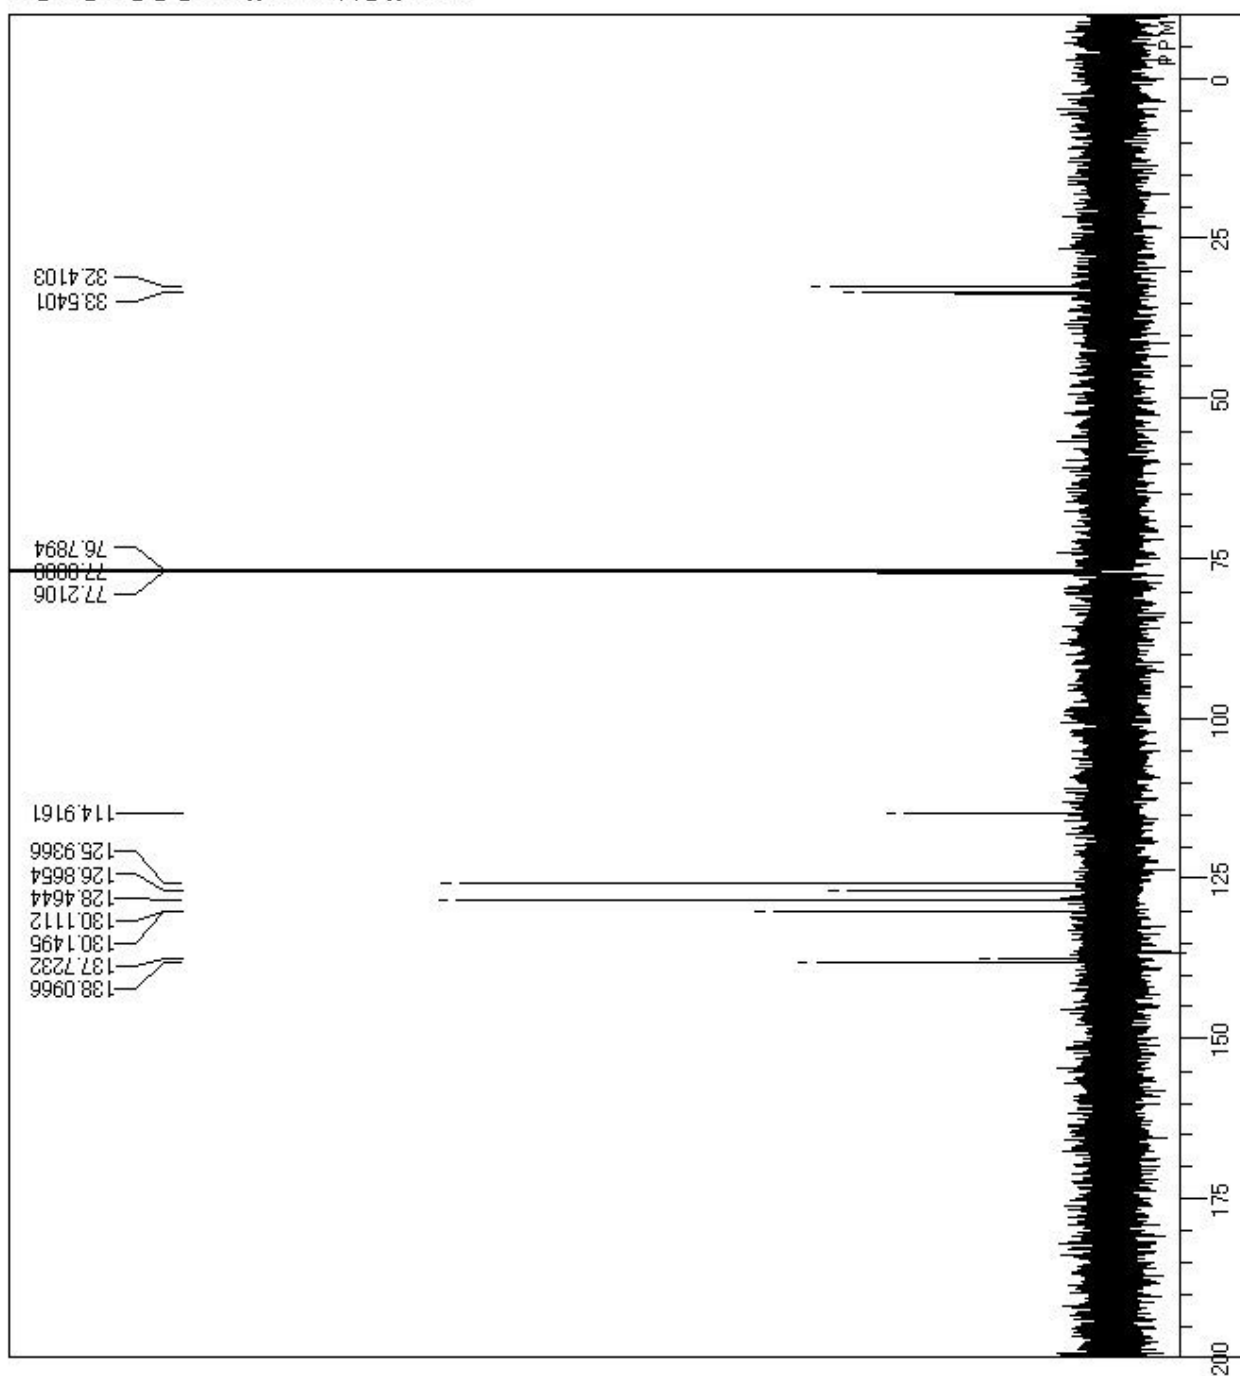

C:\Documents and Settings\delta\My I

DFILE  
COMNT  
DATIM  
OBNUC  
EXMOD  
OBFRQ  
OBSET  
OBFIN  
POINT  
FREQU  
SCANS  
ACQTM  
PD  
PWI  
IRNUC  
CTEMP  
SLVNT  
EXREF  
BF  
RGAIN

single pulse  
18-06-2010 03:38:51  
1H  
single pulse.ex2  
600.17 MHz  
5.30 KHz  
5.47 Hz  
16384  
11261.26 Hz  
8  
1.4549 sec  
2.0000 sec  
6.50 usec  
1H  
25.2 c  
CDCL3  
0.00 ppm  
0.12 Hz  
36

1.2460  
1.2575  
1.2689  
1.5277  
1.7545  
1.7659  
2.2458  
2.2572  
2.2687  
2.2801  
2.2916  
2.3030  
2.3145  
2.3260  
2.3374  
2.6913  
2.7027  
2.7142  
2.7256  
2.7371  
2.7485  
3.1826  
3.1849  
3.1876  
5.0756  
5.0928  
5.1054  
5.1089  
5.1340  
5.1363  
5.8922  
5.9048  
5.9094  
5.9162  
5.9208  
5.9334  
5.9380  
5.9449  
5.9494  
5.9620  
7.1760  
7.2332  
7.2378  
7.2436  
7.2458  
7.2550  
7.2665  
7.2722  
7.2745  
7.2779  
7.2802  
7.2848  
7.2974  
7.3100  
7.3741  
7.3787  
7.3821  
7.3913  
7.3947

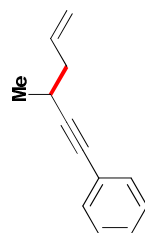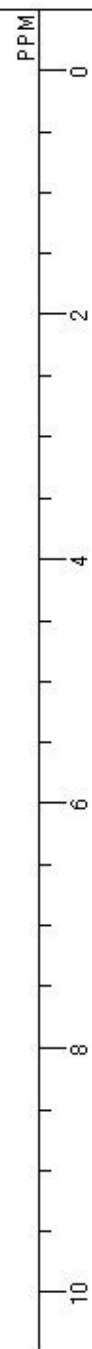

C:\Documents and Settings\My I

18-06-2010 03:48:03

13C

single\_pulse\_dec

160.92 MHz

8.52 KHz

1.74 Hz

32768

47348.48 Hz

147

0.6921 sec

2.0000 sec

2.87 usec

1H

26.1 c

CDCL3

77.00 ppm

0.12 Hz

60

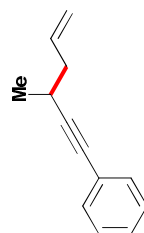

**3q: 60% (L:B = 12:1)**

DFILE  
COMNT  
DATIM  
OBNUC  
EXMOD  
OBFRQ  
OBSET  
OBFIN  
POINT  
FREQU  
SCANS  
AQCTM  
PD  
PW1  
IRNUC  
CTEMP  
SLVNT  
EXREF  
BF  
RGAIN

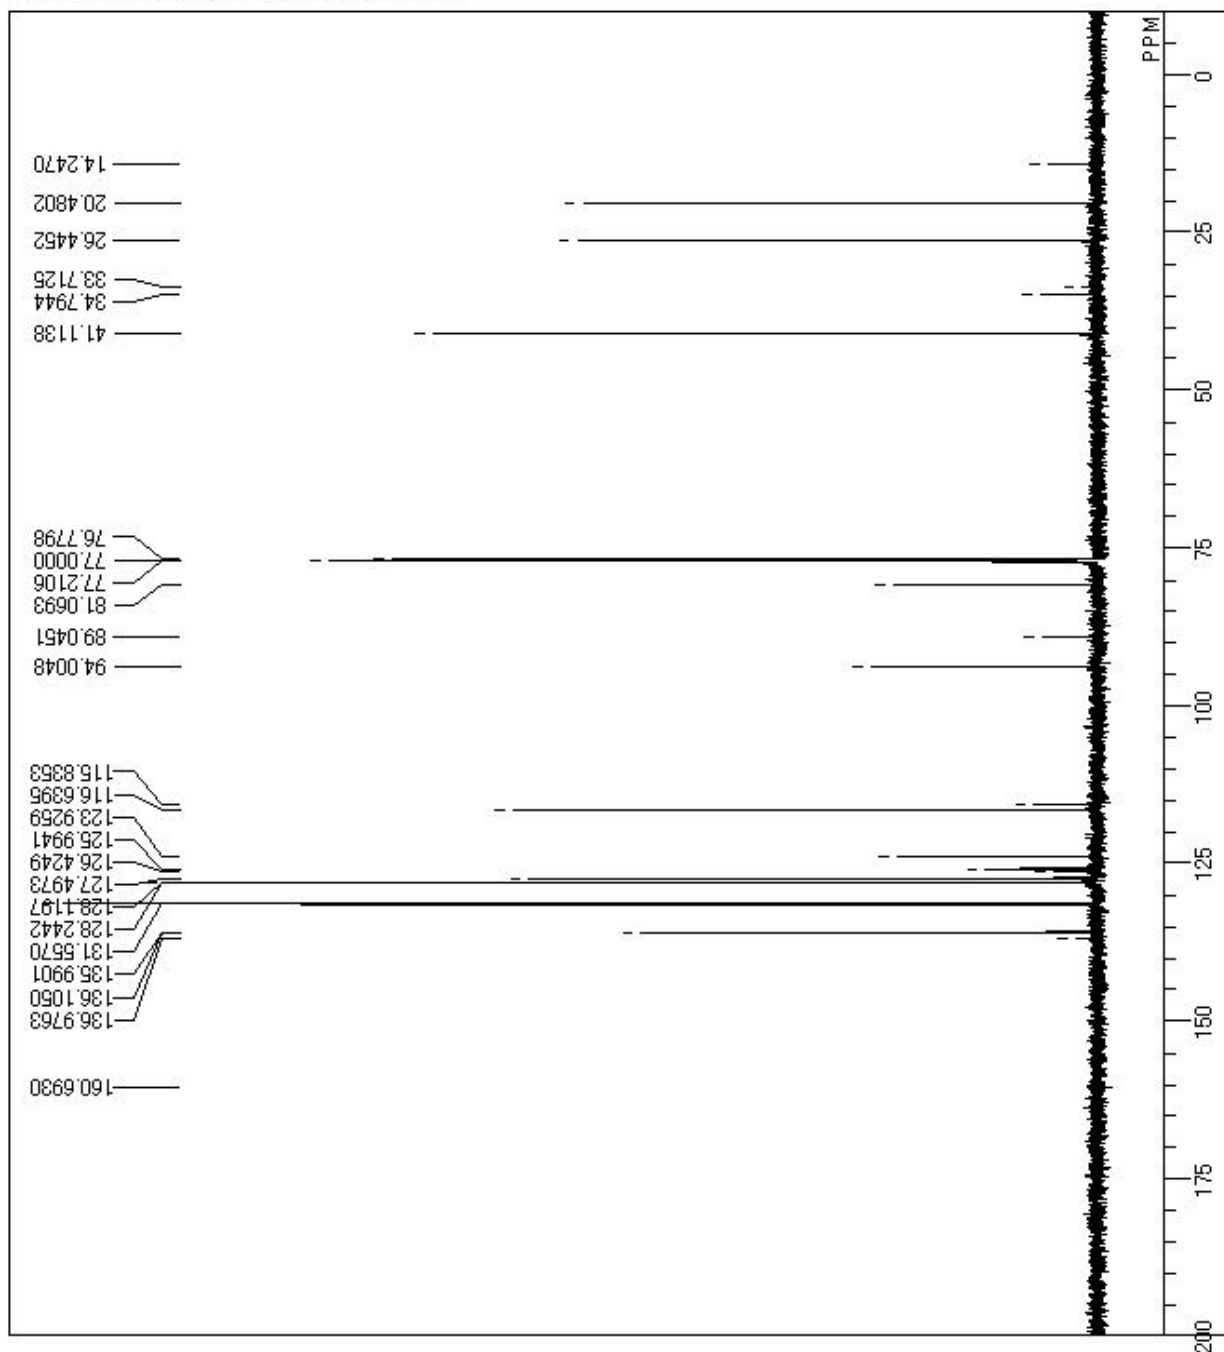

```

DFILE
COMNT
DATIM
OBNUG
EXMOD
OBFRQ
OBSET
OBFIN
POINT
FREQU
SCANS
ACQTM
PD
PW1
IRNUG
CTEMP
SLVNT
EXREF
BF
RGAIN

```

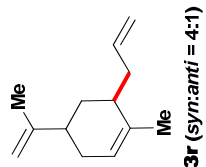

C:\Documents and Settings\delta\My [

DFILE  
COMNT  
DATIM  
OBNUC  
EXMOD  
OBFRQ  
OBSET  
OBFIN  
POINT  
FREQU  
SCANS  
ACQTM  
PD  
PWI  
IRNUC  
CTEMP  
SLVNT  
EXREF  
BF  
RGAIN

27-07-2010 20:46:16

13C

single pulse dec

100.53 MHz

5.35 KHz

5.86 Hz

32768

31407.04 Hz

208

1.0433 sec

2.0000 sec

3.50 usec

1H

407.6 c

CDCL3

77.00 ppm

0.12 Hz

56

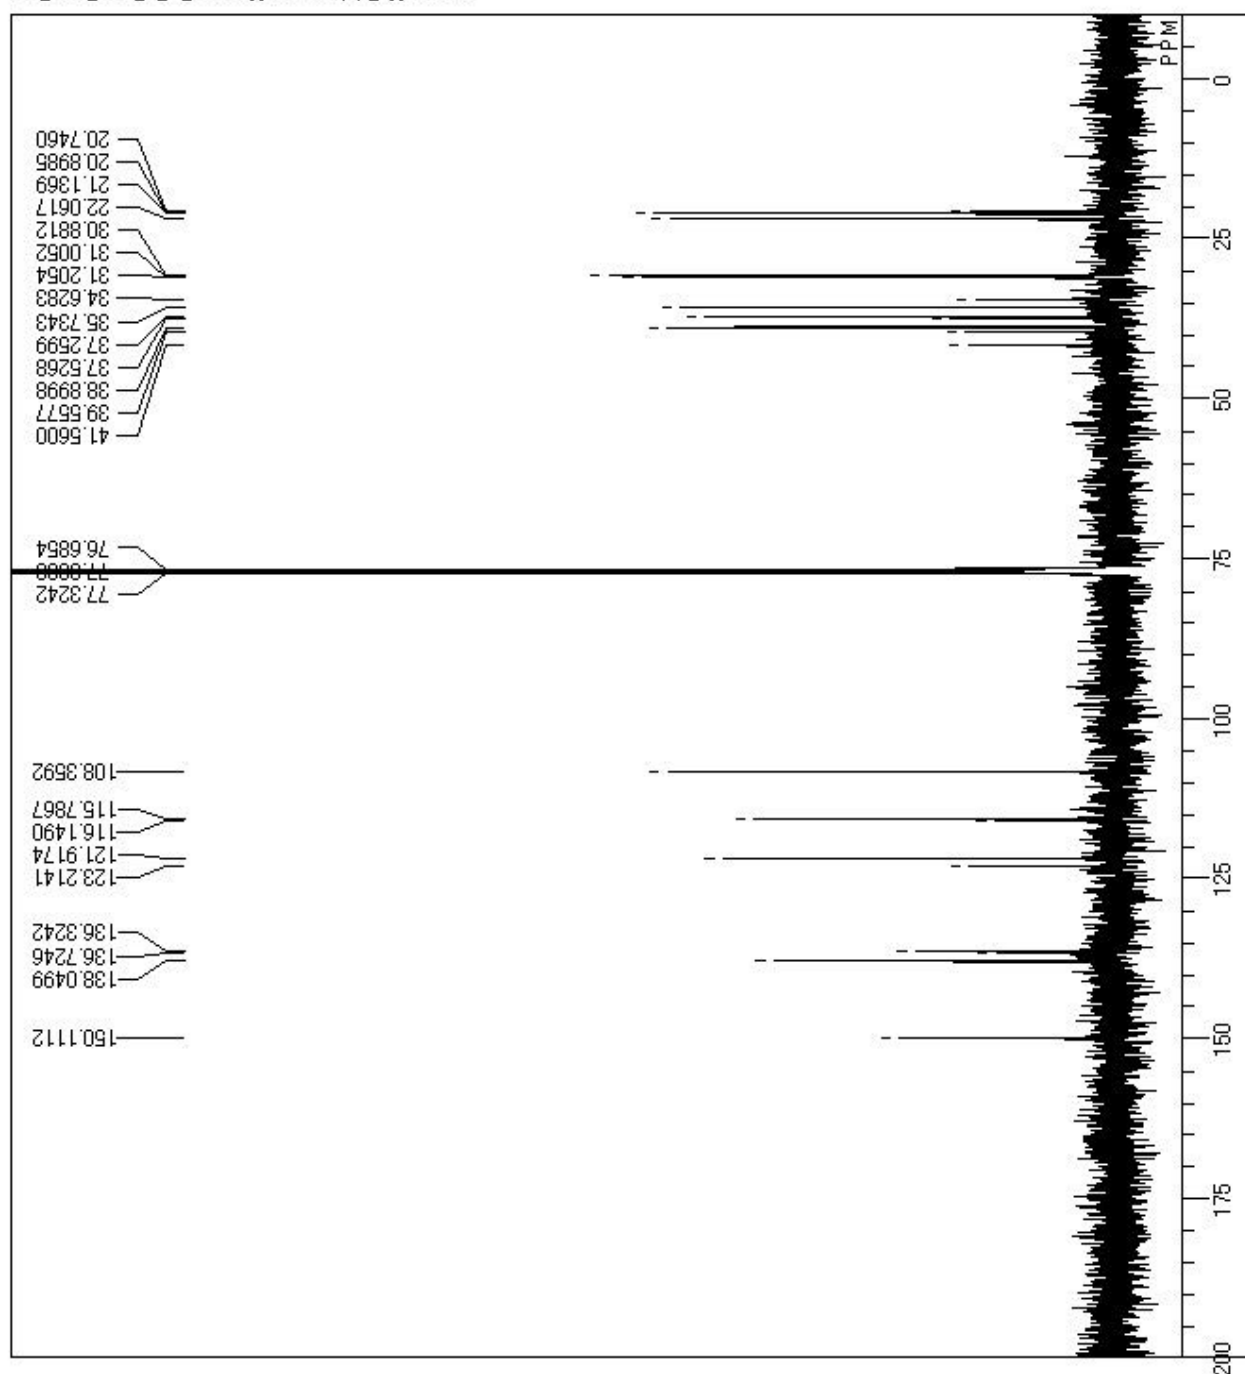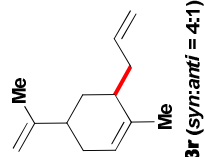

C:\Documents and Settings\delta\My I

DFILE  
COMNT  
DATIM  
OBNUC  
EXMOD  
OBFRQ  
OBSET  
OBFIN  
POINT  
FREQU  
SCANS  
ACQTM  
PD  
PW1  
IRNUC  
CTEMP  
SLVNT  
EXREF  
BF  
RGAIN

dao 718-1  
20-06-2010 18:21:25  
1H  
single pulse ex2  
399.78 MHz  
4.19 KHz  
7.29 Hz  
16384  
7503.00 Hz  
8  
2.1837 sec  
2.0000 sec  
6.50 usec  
1H  
405.1 c  
CDCL3  
0.00 ppm  
0.12 Hz  
34

1.4834  
1.5716  
1.5899  
1.6094  
1.6277  
1.6472  
1.9771  
1.9954  
2.0138  
2.0310  
2.1249  
2.4697  
2.4892  
2.5086  
3.6690  
3.7080  
3.7251  
3.7366  
3.7480  
4.8798  
4.8821  
4.9027  
4.9050  
4.9073  
4.9153  
4.9187  
4.9233  
4.9279  
4.9577  
4.9623  
4.9668  
5.7045  
5.7206  
5.7297  
5.7378  
5.7469  
5.7641  
5.7733  
5.7801  
5.7893  
5.8065  
5.8099  
5.7389  
6.7435  
6.7550  
6.7595  
6.7676  
7.0070  
7.0287  
7.1708

3.38052

2.21758

2.03153

2.11137

2.09737

1.00000

2.13715

2.00344

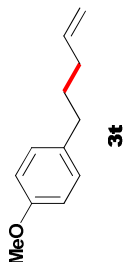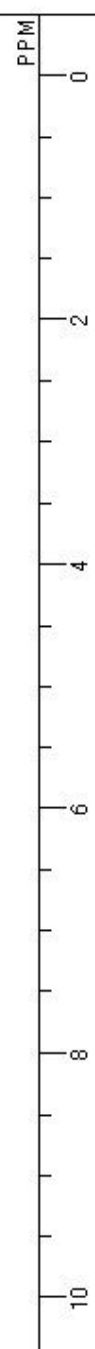

C:\Documents and Settings\delta\My I

DFILE  
COMNT  
DATIM  
OBNUC  
EXMOD  
OBFRQ  
OBSET  
OBFIN  
POINT  
FREQU  
SCANS  
ACQTM  
PD  
PWI  
IRNUC  
CTEMP  
SLVNT  
EXREF  
BF  
RGAIN

20-06-2010 18:31:43  
13C  
single\_pulse\_dec  
100.53 MHz  
5.35 KHz  
5.86 Hz  
32768  
31407.04 Hz  
134  
1.0433 sec  
2.0000 sec  
3.50 usec  
1H  
405.1 c  
CDCL3  
77.00 ppm  
0.20 Hz  
56

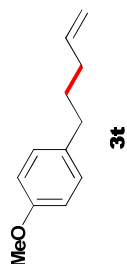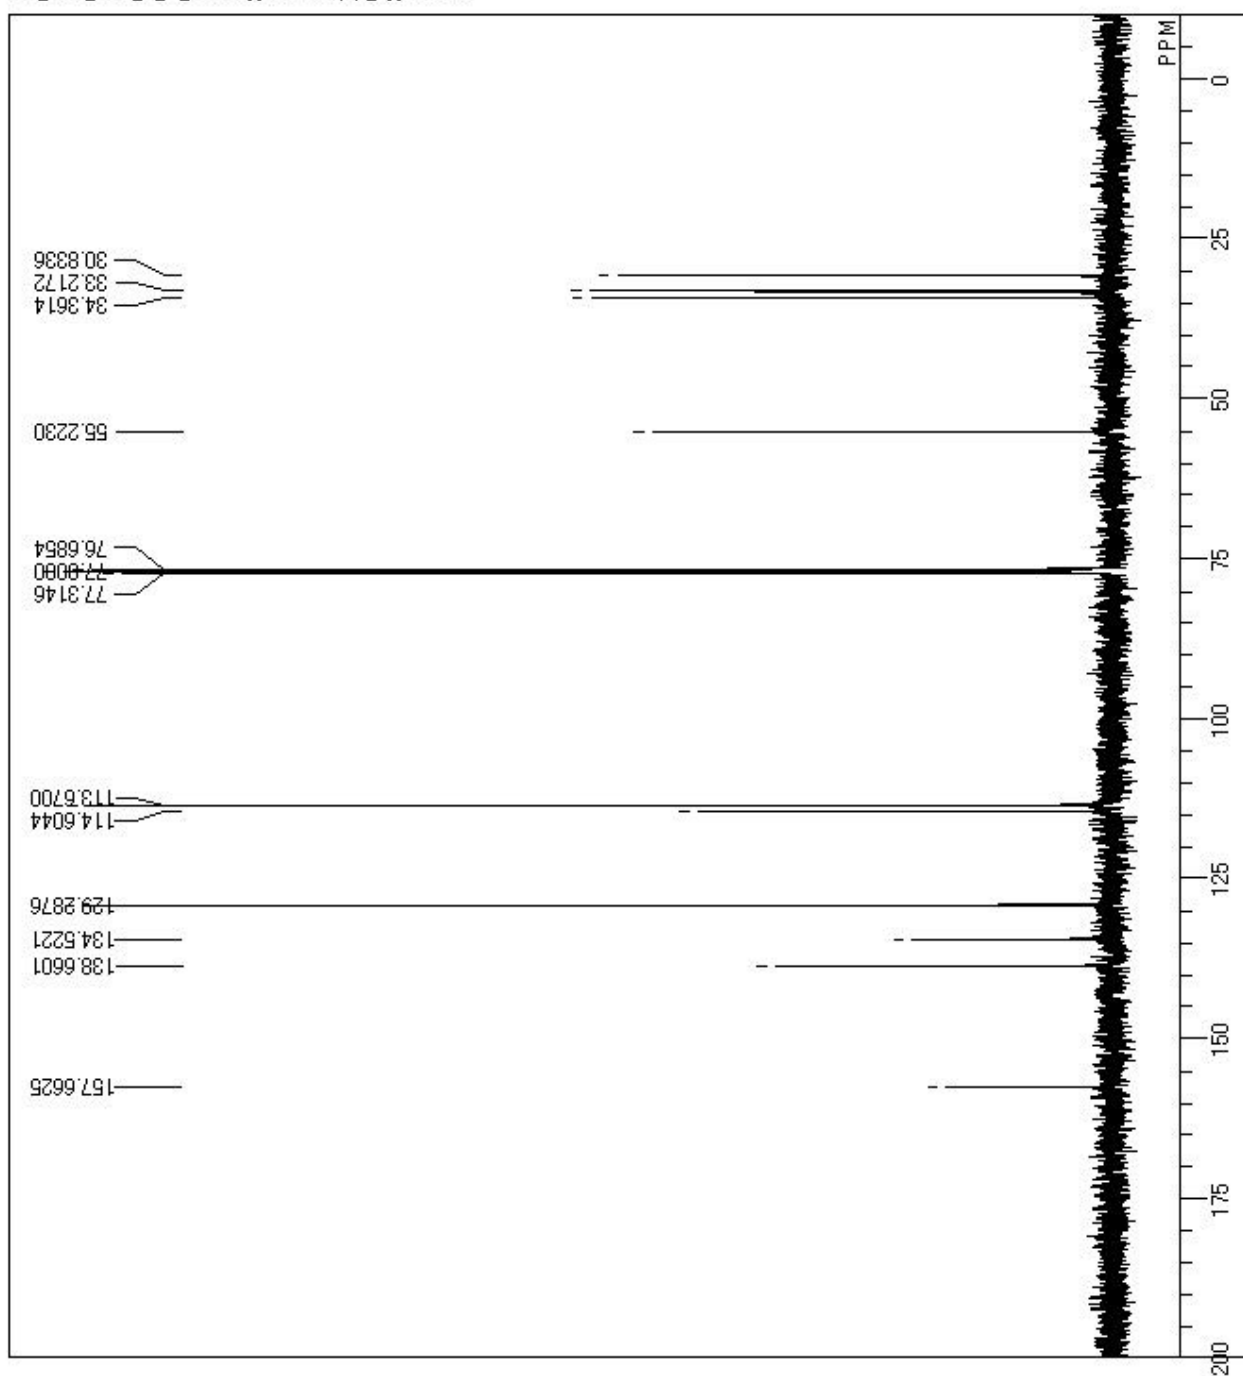

C:\Documents and Settings\delta\My [

DFILE  
COMNT  
DATIM  
OBNUC  
EXMOD  
OBFRQ  
OBSET  
OBFIN  
POINT  
FREQU  
SCANS  
ACQTM  
PD  
PW1  
IRNUC  
CTEMP  
SLVNT  
EXREF  
BF  
RGAIN

27-07-2010 20:20:11  
1H  
single\_pulse.ex2  
399.78 MHz  
4.19 KHz  
7.29 Hz  
13107  
6002.31 Hz  
8  
2.1837 sec  
2.0000 sec  
6.50 usec  
1H  
407.6 c  
ODCL3  
0.00 ppm  
0.71 Hz  
28

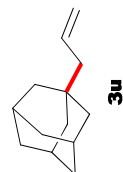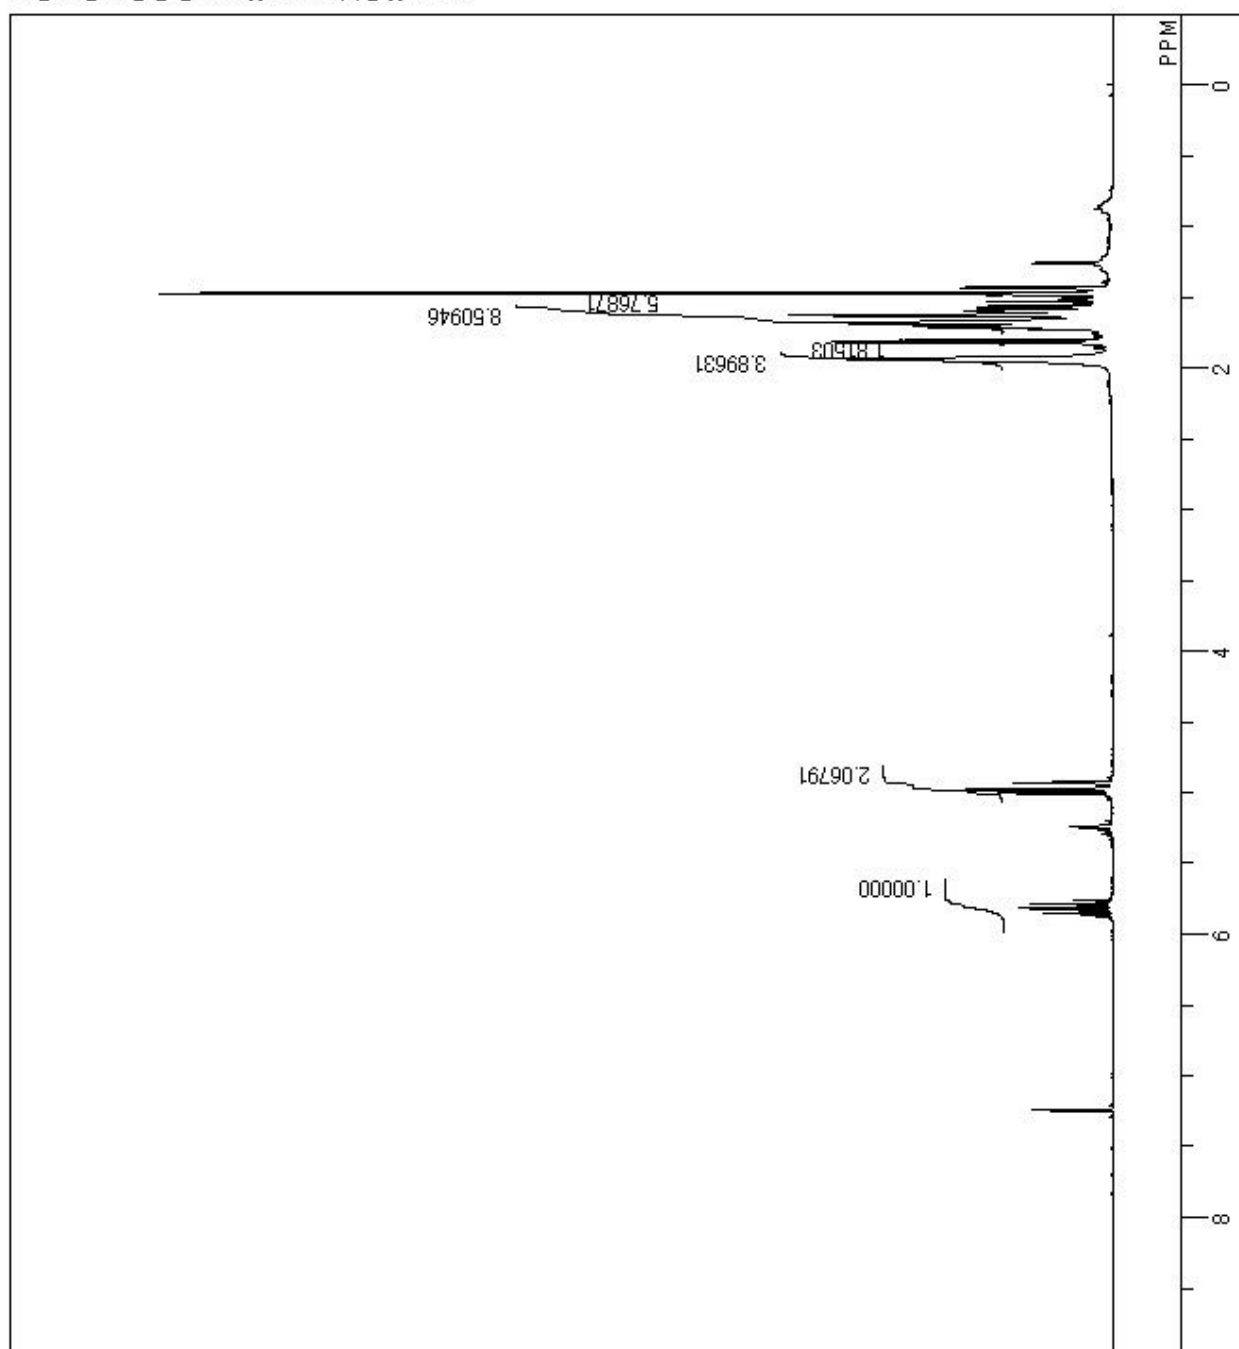

S-51

C:\Documents and Settings\delta\My I

27-07-2010 20:25:04

13C  
single pulse dec

100.53 MHz

5.35 KHz

5.86 Hz

32768

31407.04 Hz

36

1.0433 sec

2.0000 sec

3.50 usec

1H

407.6 c

CDCL3

77.00 ppm

0.71 Hz

56

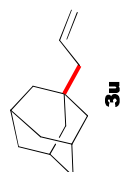

DFILE  
COMNT  
DATIM  
OBNUC  
EXMOD  
OBFRQ  
OBSET  
OBFIN  
POINT  
FREQU  
SCANS  
ACQTM  
PW1  
IRNUC  
CTEMP  
SLVNT  
EXREF  
BF  
RGAIN

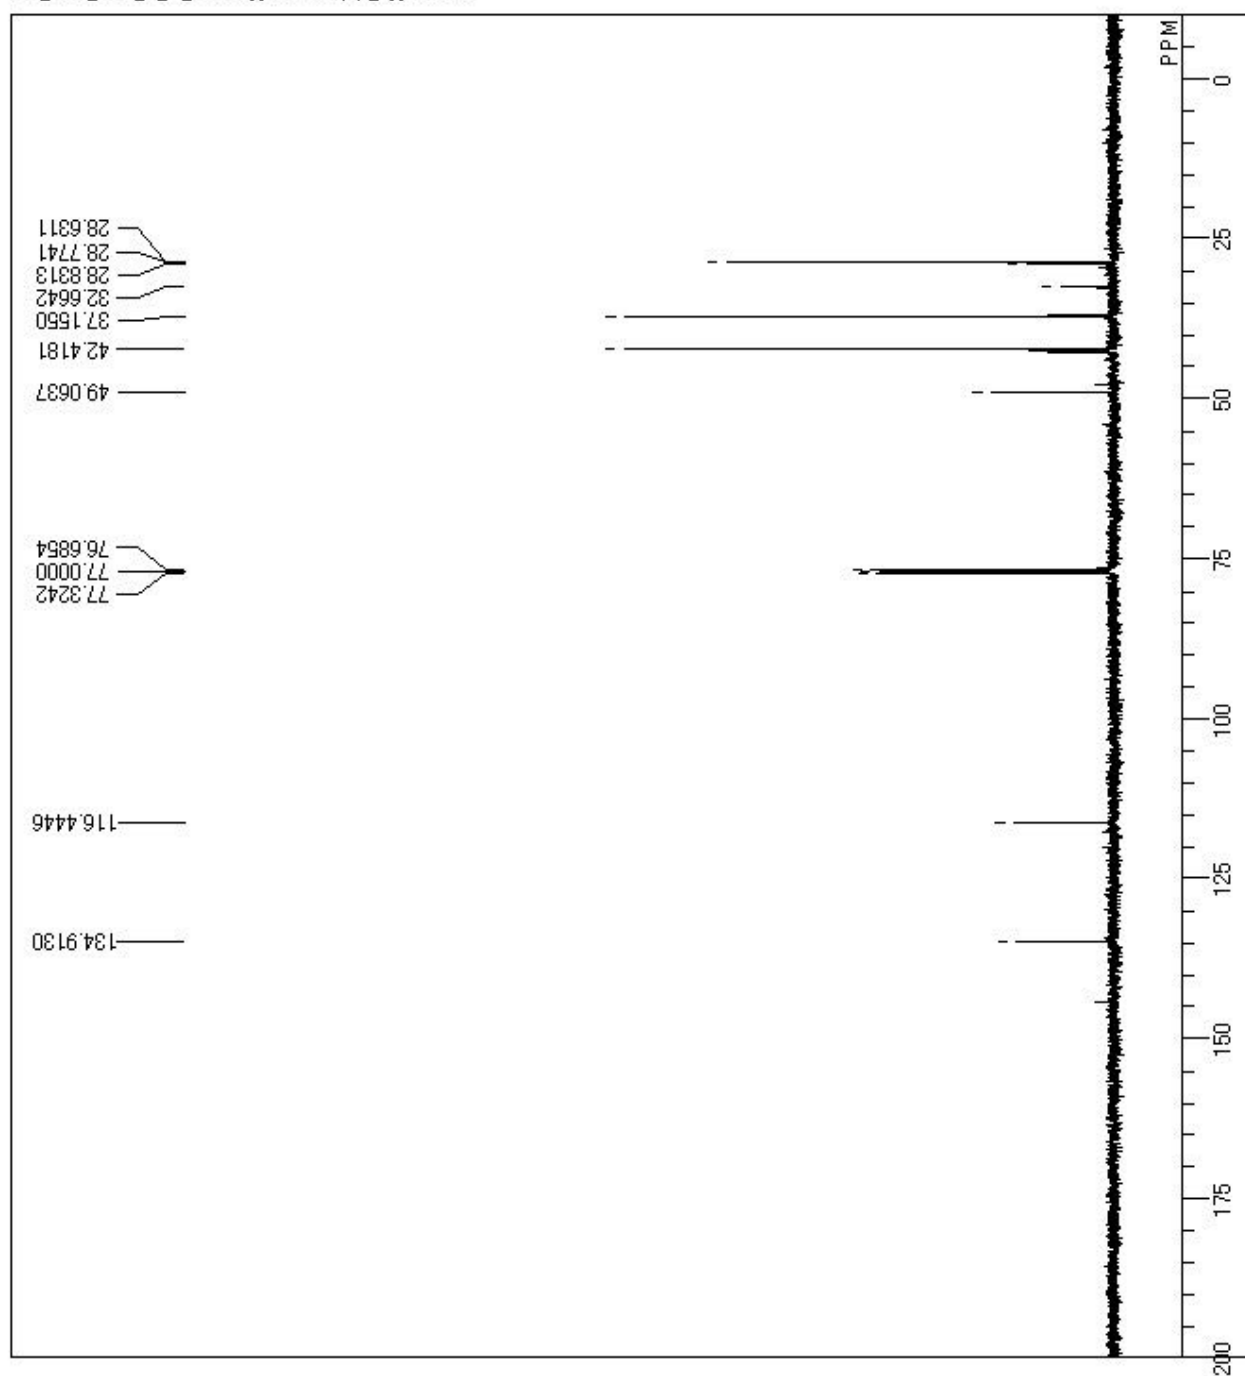

Supplement: c0cc03673k.pdf [file c0cc03673k.pdf]
